# Supplementary material for: Gut Pathology and Responses to the Microsporidium Nosema ceranae in the Honey Bee Apis mellifera
Source: PLoS One. 2012 May 18;7(5):e37017. doi: 10.1371/journal.pone.0037017 (PMC3356400; doi:10.1371/journal.pone.0037017)
Supplement: Table S2 — List of genes associated with each Gene Ontology category (see Table 1). GB accession number, fly orthologs and M-and q-values are shown. (XLSX) [file pone.0037017.s003.xlsx]

## Sheet: Table S2
		Downregulated							Upregulated
GO term	Bee name	Fly name	M	qvalue			GO term	Bee name	Fly name	M	qvalue
plasma membrane	GB13229	Z band alternatively spliced PDZ-motif protein	-0.497979	0.0940056			response to oxidative stress	GB10907	Inositol 1,4,5-triphosphate kinase 1	0.559173	0.0667789
	GB19884	heartless	-0.857823	0.0191133				GB15202	CG1349	0.554102	0.090094
	GB11625	Semaphorin-5c	-0.597931	0.0612528				GB30227	Catalase	0.676803	0.0502834
	GB10342	tweety	-0.744406	0.048335				GB12875	CG6666	0.583114	0.0621965
	GB12463	armadillo	-0.859134	0.0477511				GB18955	Glutathione peroxidase	0.521949	0.099043
	GB15780	Protein kinase 61C	-0.900347	0.0710714			oxidation reduction	GB13505	CG18003	0.993346	0.0175712
	GB10437	Furin 1	-1.1675	0.0175712				GB16218	sluggish A	0.896179	0.0245043
	GB11452	CG33208	-0.610177	0.0746369				GB12327	CG8665	0.592585	0.0650687
	GB12185	lethal (2) 01289	-0.521772	0.0836835				GB11683	CG3446	0.483084	0.0986718
	GB18384	vein	-0.596275	0.0475833				GB30227	Catalase	0.676803	0.0502834
	GB17989	shotgun	-0.665163	0.0666213				GB18760	CG7322	0.902289	0.0251092
	GB13853	Dystrophin	-0.545774	0.0748524				GB13292	CG15629	0.498516	0.0958868
	GB12765	frizzled 2	-0.541252	0.0830997				GB11150	CG17856	0.545508	0.0980605
	GB14967	Dystroglycan	-0.603716	0.0481694				GB15768	Flavin-containing monooxygenase 1	0.750017	0.0701569
	GB15061	retinal degeneration B	-0.580126	0.0520647				GB12875	CG6666	0.583114	0.0621965
	GB12207	Epidermal growth factor receptor	-0.936731	0.0214627				GB18955	Glutathione peroxidase	0.521949	0.099043
	GB14803	Trehalase	-0.957861	0.0295394			Interpro term	Bee name	Fly name	M	qvalue
	GB19698	Na+-driven anion exchanger 1	-0.742063	0.0260067			Sugar transporter, conserved site	GB12932	CG4797	0.809688	0.0352244
	GB11407	β Spectrin	-0.76659	0.0221587				GB16424	CG3168	0.55414	0.0539968
	GB14273	neuralized	-0.769199	0.0538644				GB13688	CG30035	0.560441	0.0548334
	GB30186	CG1862	-0.780145	0.0581225				GB17752	CG31100	0.623576	0.0856623
	GB30071	CG18408	-0.5134	0.0844266
	GB14314	scavenger receptor acting in neural tissue and majority of rhodopsin is absent	-1.02876	0.0796718
	GB13120	Glycoprotein 3-alpha-L-fucosyltransferase A	-0.869927	0.0539968
	GB12564	Synapsin	-0.692442	0.045981
	GB20055	Na pump alpha subunit	-0.963895	0.0191133
	GB17403	Ca2+-channel-protein-β-subunit	-0.769859	0.0606467
	GB18394	foraging	-0.668382	0.0701569
	GB18435	CG1212	-1.09237	0.045981
	GB11426	CG14992	-0.650262	0.036339
	GB19294	Keren	-1.03192	0.0180197
	GB13224	Multi drug resistance 49	-0.651349	0.0388996
neuron differentiation	GB11999	dally-like	-0.702044	0.0836835
	GB14857	hairy	-1.07847	0.0295394
	GB11625	Semaphorin-5c	-0.597931	0.0612528
	GB13456	groucho	-0.543676	0.0648719
	GB15295	Pituitary homeobox 1 homolog	-0.667864	0.0727926
	GB12463	armadillo	-0.859134	0.0477511
	GB10504	pumilio	-0.570677	0.0520647
	GB19937	SoxNeuro	-0.85372	0.0539968
	GB19929	slit	-0.891043	0.0441777
	GB16014	Semaphorin-2A	-0.799338	0.0232885
	GB11452	CG33208	-0.610177	0.0746369
	GB17210	smooth	-0.735411	0.0748169
	GB17989	shotgun	-0.665163	0.0666213
	GB16012	rugose	-1.01318	0.0214627
	GB12765	frizzled 2	-0.541252	0.0830997
	GB18435	CG1212	-1.09237	0.045981
	GB12207	Epidermal growth factor receptor	-0.936731	0.0214627
	GB16401	basket	-0.801825	0.0285895
	GB11407	β Spectrin	-0.76659	0.0221587
	GB30186	CG1862	-0.780145	0.0581225
	GB19838	jing	-0.85064	0.0214627
	GB18613	pointed	-0.655369	0.0571434
	GB10751	tramtrack	-0.710776	0.045981
neuron development	GB11999	dally-like	-0.702044	0.0836835
	GB11625	Semaphorin-5c	-0.597931	0.0612528
	GB13456	groucho	-0.543676	0.0648719
	GB15295	Pituitary homeobox 1 homolog	-0.667864	0.0727926
	GB10504	pumilio	-0.570677	0.0520647
	GB19937	SoxNeuro	-0.85372	0.0539968
	GB19929	slit	-0.891043	0.0441777
	GB16014	Semaphorin-2A	-0.799338	0.0232885
	GB11452	CG33208	-0.610177	0.0746369
	GB17210	smooth	-0.735411	0.0748169
	GB17989	shotgun	-0.665163	0.0666213
	GB16012	rugose	-1.01318	0.0214627
	GB12765	frizzled 2	-0.541252	0.0830997
	GB18435	CG1212	-1.09237	0.045981
	GB16401	basket	-0.801825	0.0285895
	GB11407	β Spectrin	-0.76659	0.0221587
	GB30186	CG1862	-0.780145	0.0581225
	GB19838	jing	-0.85064	0.0214627
	GB18613	pointed	-0.655369	0.0571434
	GB10751	tramtrack	-0.710776	0.045981
axonogenesis	GB11999	dally-like	-0.702044	0.0836835
	GB11625	Semaphorin-5c	-0.597931	0.0612528
	GB19937	SoxNeuro	-0.85372	0.0539968
	GB19929	slit	-0.891043	0.0441777
	GB16014	Semaphorin-2A	-0.799338	0.0232885
	GB11452	CG33208	-0.610177	0.0746369
	GB17210	smooth	-0.735411	0.0748169
	GB17989	shotgun	-0.665163	0.0666213
	GB12765	frizzled 2	-0.541252	0.0830997
	GB18435	CG1212	-1.09237	0.045981
	GB11407	β Spectrin	-0.76659	0.0221587
	GB16401	basket	-0.801825	0.0285895
	GB30186	CG1862	-0.780145	0.0581225
	GB19838	jing	-0.85064	0.0214627
open tracheal system development	GB14857	hairy	-1.07847	0.0295394
	GB30329	Myosin heavy chain	-0.884079	0.0180197
	GB17989	shotgun	-0.665163	0.0666213
	GB16688	Cyclin-dependent kinase 4	-0.729001	0.0245043
	GB16181	crossveinless c	-0.809754	0.0220576
	GB20055	Na pump alpha subunit	-0.963895	0.0191133
	GB12207	Epidermal growth factor receptor	-0.936731	0.0214627
	GB12463	armadillo	-0.859134	0.0477511
	GB18065	sulfateless	-0.628877	0.0716439
	GB19929	slit	-0.891043	0.0441777
	GB19838	jing	-0.85064	0.0214627
	GB18613	pointed	-0.655369	0.0571434
axon guidance	GB11999	dally-like	-0.702044	0.0836835
	GB17989	shotgun	-0.665163	0.0666213
	GB11625	Semaphorin-5c	-0.597931	0.0612528
	GB11407	β Spectrin	-0.76659	0.0221587
	GB19937	SoxNeuro	-0.85372	0.0539968
	GB19929	slit	-0.891043	0.0441777
	GB30186	CG1862	-0.780145	0.0581225
	GB16014	Semaphorin-2A	-0.799338	0.0232885
	GB19838	jing	-0.85064	0.0214627
	GB11452	CG33208	-0.610177	0.0746369
	GB17210	smooth	-0.735411	0.0748169
tissue homeostasis	GB17989	shotgun	-0.665163	0.0666213
	GB16457	u-shaped	-0.693275	0.0746369
	GB16181	crossveinless c	-0.809754	0.0220576
	GB20055	Na pump alpha subunit	-0.963895	0.0191133
	GB12207	Epidermal growth factor receptor	-0.936731	0.0214627
tissue morphogenesis	GB19901	puckered	-0.922362	0.0233057
	GB19884	heartless	-0.857823	0.0191133
	GB14141	cheerio	-0.86792	0.0214627
	GB12463	armadillo	-0.859134	0.0477511
	GB19929	slit	-0.891043	0.0441777
	GB18065	sulfateless	-0.628877	0.0716439
	GB17989	shotgun	-0.665163	0.0666213
	GB14967	Dystroglycan	-0.603716	0.0481694
	GB16181	crossveinless c	-0.809754	0.0220576
	GB16457	u-shaped	-0.693275	0.0746369
	GB12207	Epidermal growth factor receptor	-0.936731	0.0214627
	GB16401	basket	-0.801825	0.0285895
	GB19294	Keren	-1.03192	0.0180197
	GB18613	pointed	-0.655369	0.0571434
transmembrane receptor protein tyrosine kinase signaling pathway	GB18384	vein	-0.596275	0.0475833
	GB19884	heartless	-0.857823	0.0191133
	GB16457	u-shaped	-0.693275	0.0746369
	GB16181	crossveinless c	-0.809754	0.0220576
	GB12207	Epidermal growth factor receptor	-0.936731	0.0214627
	GB19294	Keren	-1.03192	0.0180197
	GB15780	Protein kinase 61C	-0.900347	0.0710714
	GB18065	sulfateless	-0.628877	0.0716439
	GB18613	pointed	-0.655369	0.0571434
neuromuscular process	GB11625	Semaphorin-5c	-0.597931	0.0612528
	GB20055	Na pump alpha subunit	-0.963895	0.0191133
	GB14273	neuralized	-0.769199	0.0538644
	GB10751	tramtrack	-0.710776	0.045981
enzyme linked receptor protein signaling pathway	GB11999	dally-like	-0.702044	0.0836835
	GB18384	vein	-0.596275	0.0475833
	GB19884	heartless	-0.857823	0.0191133
	GB16457	u-shaped	-0.693275	0.0746369
	GB16181	crossveinless c	-0.809754	0.0220576
	GB12207	Epidermal growth factor receptor	-0.936731	0.0214627
	GB19294	Keren	-1.03192	0.0180197
	GB15780	Protein kinase 61C	-0.900347	0.0710714
	GB18065	sulfateless	-0.628877	0.0716439
	GB18613	pointed	-0.655369	0.0571434
positive regulation of cell communication	GB11999	dally-like	-0.702044	0.0836835
	GB18384	vein	-0.596275	0.0475833
	GB12463	armadillo	-0.859134	0.0477511
	GB11407	β Spectrin	-0.76659	0.0221587
	GB19294	Keren	-1.03192	0.0180197
	GB14273	neuralized	-0.769199	0.0538644
intracellular signaling cascade	GB16799	CG31140	-1.01374	0.0334538
	GB19901	puckered	-0.922362	0.0233057
	GB17258	CG9098	-0.712449	0.0285895
	GB14180	CG13375	-0.550287	0.0753342
	GB20120	CG5712	-0.728401	0.0475833
	GB16688	Cyclin-dependent kinase 4	-0.729001	0.0245043
	GB10445	Rapgap1	-0.604767	0.0710862
	GB16811	gustavus	-1.06174	0.0409978
	GB11276	CG3216	-0.586485	0.0666213
	GB11950	Ral guanine nucleotide exchange factor 2	-0.857207	0.034386
	GB16401	basket	-0.801825	0.0285895
	GB19294	Keren	-1.03192	0.0180197
	GB16444	CG10737	-0.778561	0.0214627
	GB18613	pointed	-0.655369	0.0571434
protein amino acid phosphorylation	GB19884	heartless	-0.857823	0.0191133
	GB15780	Protein kinase 61C	-0.900347	0.0710714
	GB16688	Cyclin-dependent kinase 4	-0.729001	0.0245043
	GB10792	Germinal centre kinase III	-0.738929	0.0688756
	GB14600	smell impaired 35A	-0.879139	0.0517312
	GB18394	foraging	-0.668382	0.0701569
	GB13245	Chromosomal serine/threonine-protein kinase JIL-1	-0.925282	0.0245043
	GB11276	CG3216	-0.586485	0.0666213
	GB12207	Epidermal growth factor receptor	-0.936731	0.0214627
	GB11426	CG14992	-0.650262	0.036339
	GB12884	CG17090	-0.781224	0.0927768
	GB16401	basket	-0.801825	0.0285895
	GB14793	CG11221	-0.646104	0.0836786
morphogenesis of an epithelium	GB19901	puckered	-0.922362	0.0233057
	GB17989	shotgun	-0.665163	0.0666213
	GB16457	u-shaped	-0.693275	0.0746369
	GB14967	Dystroglycan	-0.603716	0.0481694
	GB16181	crossveinless c	-0.809754	0.0220576
	GB14141	cheerio	-0.86792	0.0214627
	GB12207	Epidermal growth factor receptor	-0.936731	0.0214627
	GB12463	armadillo	-0.859134	0.0477511
	GB19294	Keren	-1.03192	0.0180197
	GB16401	basket	-0.801825	0.0285895
	GB18065	sulfateless	-0.628877	0.0716439
	GB18613	pointed	-0.655369	0.0571434
