# Supplementary material for: Gut Pathology and Responses to the Microsporidium Nosema ceranae in the Honey Bee Apis mellifera
Source: PLoS One. 2012 May 18;7(5):e37017. doi: 10.1371/journal.pone.0037017 (PMC3356400; doi:10.1371/journal.pone.0037017)
Supplement: Table S5 — Tiling array summary. (XLSX) [file pone.0037017.s006.xlsx]

## Sheet: Feuil1
Group	Species	Accession	Length	No. of probes	No. of genes	No. of exons
	Apis mellifera strain DH4 linkage group	CM000054	29934090	907212	1242	8105
	Apis mellifera strain DH4 linkage group	CM000055	16072177	492326	767	5153
	Apis mellifera strain DH4 linkage group	CM000056	17739083	519306	515	3757
	Apis mellifera strain DH4 linkage group	CM000057	14521977	431736	789	5577
	Apis mellifera strain DH4 linkage group	CM000058	14500692	452574	713	4558
	Apis mellifera strain DH4 linkage group	CM000059	13621520	401815	566	4232
	Apis mellifera strain DH4 linkage group	CM000060	12256690	392664	600	4432
	Apis mellifera strain DH4 linkage group	CM000061	13189223	374433	632	4384
	Apis mellifera strain DH4 linkage group	CM000062	11082907	345538	484	3174
	Apis mellifera strain DH4 linkage group	CM000063	12848973	356374	445	3122
	Apis mellifera strain DH4 linkage group	CM000064	10266737	321011	413	2487
	Apis mellifera strain DH4 linkage group	CM000065	9976661	306822	612	3917
	Apis mellifera strain DH4 linkage group	CM000066	10159687	276667	1207	7487
	Apis mellifera strain DH4 linkage group	CM000067	11309010	343998	423	3023
	Apis mellifera strain DH4 linkage group	CM000068	12642577	365799	577	3973
	Apis mellifera strain DH4 linkage group	CM000069	7072872	208362	641	4568
	Apis mellifera strain DH4 Amel_4.0_GroupUn genomic scaffold	CH876891	167350	4492	16	136
	Apis mellifera strain DH4 Amel_4.0_GroupUn genomic scaffold	CH876892	68320	1584	0	0
	Apis mellifera strain DH4 Amel_4.0_GroupUn genomic scaffold	CH876893	41328	476	0	0
	Apis mellifera strain DH4 Amel_4.0_GroupUn genomic scaffold	CH876894	75035	2477	11	48
	Apis mellifera strain DH4 Amel_4.0_GroupUn genomic scaffold	CH876895	54497	1580	3	9
	Apis mellifera strain DH4 Amel_4.0_GroupUn genomic scaffold	CH876896	67495	2184	5	42
	Apis mellifera strain DH4 Amel_4.0_GroupUn genomic scaffold	CH876897	134830	4716	5	30
	Apis mellifera strain DH4 Amel_4.0_GroupUn genomic scaffold	CH876898	72672	2473	7	37
	Apis mellifera strain DH4 Amel_4.0_GroupUn genomic scaffold	CH876899	155064	5062	3	17
	Apis mellifera strain DH4 Amel_4.0_GroupUn genomic scaffold	CH876900	39617	1327	0	0
	Apis mellifera strain DH4 Amel_4.0_GroupUn genomic scaffold	CH876901	40108	1276	0	0
	Apis mellifera strain DH4 Amel_4.0_GroupUn genomic scaffold	CH876902	45492	1550	2	9
	Apis mellifera strain DH4 Amel_4.0_GroupUn genomic scaffold	CH876903	54739	1736	0	0
	Apis mellifera strain DH4 Amel_4.0_GroupUn genomic scaffold	CH876904	66121	2337	11	68
	Apis mellifera strain DH4 Amel_4.0_GroupUn genomic scaffold	CH876905	43404	1282	0	0
	Apis mellifera strain DH4 Amel_4.0_GroupUn genomic scaffold	CH876906	39468	1291	0	0
	Apis mellifera strain DH4 Amel_4.0_GroupUn genomic scaffold	CH876907	97919	3426	3	17
	Apis mellifera strain DH4 Amel_4.0_GroupUn genomic scaffold	CH876908	64275	2081	8	38
	Apis mellifera strain DH4 Amel_4.0_GroupUn genomic scaffold	CH876909	86093	2766	6	36
	Apis mellifera strain DH4 Amel_4.0_GroupUn genomic scaffold	CH876910	42195	1462	5	40
	Apis mellifera strain DH4 Amel_4.0_GroupUn genomic scaffold	CH876911	19463	659	1	3
	Apis mellifera strain DH4 Amel_4.0_GroupUn genomic scaffold	CH876912	36507	1197	0	0
	Apis mellifera strain DH4 Amel_4.0_GroupUn genomic scaffold	CH876913	58882	2027	0	0
	Apis mellifera strain DH4 Amel_4.0_GroupUn genomic scaffold	CH876914	69063	2455	0	0
	Apis mellifera strain DH4 Amel_4.0_GroupUn genomic scaffold	CH876915	43218	1474	2	14
	Apis mellifera strain DH4 Amel_4.0_GroupUn genomic scaffold	CH876916	38053	1305	6	39
	Apis mellifera strain DH4 Amel_4.0_GroupUn genomic scaffold	CH876917	32410	983	2	4
	Apis mellifera strain DH4 Amel_4.0_GroupUn genomic scaffold	CH876918	78934	2666	1	6
	Apis mellifera strain DH4 Amel_4.0_GroupUn genomic scaffold	CH876919	64983	2094	5	51
	Apis mellifera strain DH4 Amel_4.0_GroupUn genomic scaffold	CH876920	21236	588	0	0
	Apis mellifera strain DH4 Amel_4.0_GroupUn genomic scaffold	CH876921	42353	1398	0	0
	Apis mellifera strain DH4 Amel_4.0_GroupUn genomic scaffold	CH876922	64069	2301	4	17
	Apis mellifera strain DH4 Amel_4.0_GroupUn genomic scaffold	CH876923	56415	1970	9	68
	Apis mellifera strain DH4 Amel_4.0_GroupUn genomic scaffold	CH876924	40162	1342	9	68
	Apis mellifera strain DH4 Amel_4.0_GroupUn genomic scaffold	CH876925	34649	1146	0	0
	Apis mellifera strain DH4 Amel_4.0_GroupUn genomic scaffold	CH876926	51687	1853	27	147
	Apis mellifera strain DH4 Amel_4.0_GroupUn genomic scaffold	CH876927	58824	1962	0	0
	Apis mellifera strain DH4 Amel_4.0_GroupUn genomic scaffold	CH876928	26954	810	0	0
	Apis mellifera strain DH4 Amel_4.0_GroupUn genomic scaffold	CH876929	78775	2796	5	42
	Apis mellifera strain DH4 Amel_4.0_GroupUn genomic scaffold	CH876930	67968	2332	10	81
	Apis mellifera strain DH4 Amel_4.0_GroupUn genomic scaffold	CH876931	49957	1561	11	31
	Apis mellifera strain DH4 Amel_4.0_GroupUn genomic scaffold	CH876932	33836	1110	0	0
	Apis mellifera strain DH4 Amel_4.0_GroupUn genomic scaffold	CH876933	23751	781	0	0
	Apis mellifera strain DH4 Amel_4.0_GroupUn genomic scaffold	CH876934	42741	1299	2	6
	Apis mellifera strain DH4 Amel_4.0_GroupUn genomic scaffold	CH876935	32498	661	0	0
	Apis mellifera strain DH4 Amel_4.0_GroupUn genomic scaffold	CH876936	60385	2098	0	0
	Apis mellifera strain DH4 Amel_4.0_GroupUn genomic scaffold	CH876937	54856	1475	4	17
	Apis mellifera strain DH4 Amel_4.0_GroupUn genomic scaffold	CH876938	53464	1895	6	37
	Apis mellifera strain DH4 Amel_4.0_GroupUn genomic scaffold	CH876939	34802	1134	2	2
	Apis mellifera strain DH4 Amel_4.0_GroupUn genomic scaffold	CH876940	47299	1593	14	71
	Apis mellifera strain DH4 Amel_4.0_GroupUn genomic scaffold	CH876941	34146	1129	8	50
	Apis mellifera strain DH4 Amel_4.0_GroupUn genomic scaffold	CH876942	52461	1802	13	81
	Apis mellifera strain DH4 Amel_4.0_GroupUn genomic scaffold	CH876943	69623	2396	18	101
	Apis mellifera strain DH4 Amel_4.0_GroupUn genomic scaffold	CH876944	51818	1672	0	0
	Apis mellifera strain DH4 Amel_4.0_GroupUn genomic scaffold	CH876945	41281	1430	0	0
	Apis mellifera strain DH4 Amel_4.0_GroupUn genomic scaffold	CH876946	30507	1027	1	2
	Apis mellifera strain DH4 Amel_4.0_GroupUn genomic scaffold	CH876947	55005	1800	5	35
	Apis mellifera strain DH4 Amel_4.0_GroupUn genomic scaffold	CH876948	30097	977	0	0
	Apis mellifera strain DH4 Amel_4.0_GroupUn genomic scaffold	CH876949	50311	1725	11	75
	Apis mellifera strain DH4 Amel_4.0_GroupUn genomic scaffold	CH876950	27007	980	5	25
	Apis mellifera strain DH4 Amel_4.0_GroupUn genomic scaffold	CH876951	40249	1296	10	68
	Apis mellifera strain DH4 Amel_4.0_GroupUn genomic scaffold	CH876952	17194	529	0	0
	Apis mellifera strain DH4 Amel_4.0_GroupUn genomic scaffold	CH876953	35130	824	0	0
	Apis mellifera strain DH4 Amel_4.0_GroupUn genomic scaffold	CH876954	47111	1594	1	2
	Apis mellifera strain DH4 Amel_4.0_GroupUn genomic scaffold	CH876955	38492	1306	7	102
	Apis mellifera strain DH4 Amel_4.0_GroupUn genomic scaffold	CH876956	65287	2162	2	18
	Apis mellifera strain DH4 Amel_4.0_GroupUn genomic scaffold	CH876957	16401	287	1	7
	Apis mellifera strain DH4 Amel_4.0_GroupUn genomic scaffold	CH876958	38481	1315	2	10
	Apis mellifera strain DH4 Amel_4.0_GroupUn genomic scaffold	CH876959	40839	1394	5	34
	Apis mellifera strain DH4 Amel_4.0_GroupUn genomic scaffold	CH876960	30436	1047	1	3
	Apis mellifera strain DH4 Amel_4.0_GroupUn genomic scaffold	CH876961	63468	2228	4	24
	Apis mellifera strain DH4 Amel_4.0_GroupUn genomic scaffold	CH876962	33509	1119	5	36
	Apis mellifera strain DH4 Amel_4.0_GroupUn genomic scaffold	CH876963	37702	1204	4	33
	Apis mellifera strain DH4 Amel_4.0_GroupUn genomic scaffold	CH876964	83691	2861	12	67
	Apis mellifera strain DH4 Amel_4.0_GroupUn genomic scaffold	CH876965	56271	1946	0	0
	Apis mellifera strain DH4 Amel_4.0_GroupUn genomic scaffold	CH876966	33407	1115	0	0
	Apis mellifera strain DH4 Amel_4.0_GroupUn genomic scaffold	CH876967	31727	1018	2	3
	Apis mellifera strain DH4 Amel_4.0_GroupUn genomic scaffold	CH876968	43579	1544	8	101
	Apis mellifera strain DH4 Amel_4.0_GroupUn genomic scaffold	CH876969	27154	849	0	0
	Apis mellifera strain DH4 Amel_4.0_GroupUn genomic scaffold	CH876970	71468	2325	9	44
	Apis mellifera strain DH4 Amel_4.0_GroupUn genomic scaffold	CH876971	14768	415	0	0
	Apis mellifera strain DH4 Amel_4.0_GroupUn genomic scaffold	CH876972	66126	2417	3	22
	Apis mellifera strain DH4 Amel_4.0_GroupUn genomic scaffold	CH876973	51235	1755	9	65
	Apis mellifera strain DH4 Amel_4.0_GroupUn genomic scaffold	CH876974	34171	994	0	0
	Apis mellifera strain DH4 Amel_4.0_GroupUn genomic scaffold	CH876975	61304	1475	2	3
	Apis mellifera strain DH4 Amel_4.0_GroupUn genomic scaffold	CH876976	39949	1394	5	28
	Apis mellifera strain DH4 Amel_4.0_GroupUn genomic scaffold	CH876977	33507	1034	0	0
	Apis mellifera strain DH4 Amel_4.0_GroupUn genomic scaffold	CH876978	32003	1055	0	0
	Apis mellifera strain DH4 Amel_4.0_GroupUn genomic scaffold	CH876979	52340	1871	0	0
	Apis mellifera strain DH4 Amel_4.0_GroupUn genomic scaffold	CH876980	30377	892	1	1
	Apis mellifera strain DH4 Amel_4.0_GroupUn genomic scaffold	CH876981	51299	1487	1	4
	Apis mellifera strain DH4 Amel_4.0_GroupUn genomic scaffold	CH876982	55188	1464	1	5
	Apis mellifera strain DH4 Amel_4.0_GroupUn genomic scaffold	CH876983	31950	1018	8	41
	Apis mellifera strain DH4 Amel_4.0_GroupUn genomic scaffold	CH876984	38586	1221	1	3
	Apis mellifera strain DH4 Amel_4.0_GroupUn genomic scaffold	CH876985	99439	3434	7	46
	Apis mellifera strain DH4 Amel_4.0_GroupUn genomic scaffold	CH876986	42335	1293	0	0
	Apis mellifera strain DH4 Amel_4.0_GroupUn genomic scaffold	CH876987	73375	2629	19	102
	Apis mellifera strain DH4 Amel_4.0_GroupUn genomic scaffold	CH876988	47640	1586	4	27
	Apis mellifera strain DH4 Amel_4.0_GroupUn genomic scaffold	CH876989	25192	878	7	47
	Apis mellifera strain DH4 Amel_4.0_GroupUn genomic scaffold	CH876990	25021	349	0	0
	Apis mellifera strain DH4 Amel_4.0_GroupUn genomic scaffold	CH876991	54395	2015	4	37
	Apis mellifera strain DH4 Amel_4.0_GroupUn genomic scaffold	CH876992	13477	147	0	0
	Apis mellifera strain DH4 Amel_4.0_GroupUn genomic scaffold	CH876993	28315	879	8	36
	Apis mellifera strain DH4 Amel_4.0_GroupUn genomic scaffold	CH876994	25900	897	0	0
	Apis mellifera strain DH4 Amel_4.0_GroupUn genomic scaffold	CH876995	27040	903	3	11
	Apis mellifera strain DH4 Amel_4.0_GroupUn genomic scaffold	CH876996	15008	474	2	4
	Apis mellifera strain DH4 Amel_4.0_GroupUn genomic scaffold	CH876997	22117	709	9	37
	Apis mellifera strain DH4 Amel_4.0_GroupUn genomic scaffold	CH876998	35573	1267	1	4
	Apis mellifera strain DH4 Amel_4.0_GroupUn genomic scaffold	CH876999	41197	1450	4	51
	Apis mellifera strain DH4 Amel_4.0_GroupUn genomic scaffold	CH877000	22239	766	0	0
	Apis mellifera strain DH4 Amel_4.0_GroupUn genomic scaffold	CH877001	32887	1046	2	11
	Apis mellifera strain DH4 Amel_4.0_GroupUn genomic scaffold	CH877002	13432	339	0	0
	Apis mellifera strain DH4 Amel_4.0_GroupUn genomic scaffold	CH877003	27770	548	0	0
	Apis mellifera strain DH4 Amel_4.0_GroupUn genomic scaffold	CH877004	18146	615	0	0
	Apis mellifera strain DH4 Amel_4.0_GroupUn genomic scaffold	CH877005	19601	662	0	0
	Apis mellifera strain DH4 Amel_4.0_GroupUn genomic scaffold	CH877006	26217	903	2	16
	Apis mellifera strain DH4 Amel_4.0_GroupUn genomic scaffold	CH877007	14927	404	2	3
	Apis mellifera strain DH4 Amel_4.0_GroupUn genomic scaffold	CH877008	24943	789	0	0
	Apis mellifera strain DH4 Amel_4.0_GroupUn genomic scaffold	CH877009	16958	565	2	4
	Apis mellifera strain DH4 Amel_4.0_GroupUn genomic scaffold	CH877010	48844	1597	7	70
	Apis mellifera strain DH4 Amel_4.0_GroupUn genomic scaffold	CH877011	11668	366	0	0
	Apis mellifera strain DH4 Amel_4.0_GroupUn genomic scaffold	CH877012	45287	1541	0	0
	Apis mellifera strain DH4 Amel_4.0_GroupUn genomic scaffold	CH877013	36372	1212	5	38
	Apis mellifera strain DH4 Amel_4.0_GroupUn genomic scaffold	CH877014	53882	1920	3	18
	Apis mellifera strain DH4 Amel_4.0_GroupUn genomic scaffold	CH877015	23374	534	9	34
	Apis mellifera strain DH4 Amel_4.0_GroupUn genomic scaffold	CH877016	65461	2349	10	56
	Apis mellifera strain DH4 Amel_4.0_GroupUn genomic scaffold	CH877017	36820	1112	0	0
	Apis mellifera strain DH4 Amel_4.0_GroupUn genomic scaffold	CH877018	27180	934	4	14
	Apis mellifera strain DH4 Amel_4.0_GroupUn genomic scaffold	CH877019	43137	1462	3	19
	Apis mellifera strain DH4 Amel_4.0_GroupUn genomic scaffold	CH877020	34365	1212	6	34
	Apis mellifera strain DH4 Amel_4.0_GroupUn genomic scaffold	CH877021	55222	1856	0	0
	Apis mellifera strain DH4 Amel_4.0_GroupUn genomic scaffold	CH877022	23656	809	3	16
	Apis mellifera strain DH4 Amel_4.0_GroupUn genomic scaffold	CH877023	29891	950	0	0
	Apis mellifera strain DH4 Amel_4.0_GroupUn genomic scaffold	CH877024	48108	956	0	0
	Apis mellifera strain DH4 Amel_4.0_GroupUn genomic scaffold	CH877025	41905	1325	0	0
	Apis mellifera strain DH4 Amel_4.0_GroupUn genomic scaffold	CH877026	18299	623	0	0
	Apis mellifera strain DH4 Amel_4.0_GroupUn genomic scaffold	CH877027	65485	2409	11	89
	Apis mellifera strain DH4 Amel_4.0_GroupUn genomic scaffold	CH877028	98097	3372	0	0
	Apis mellifera strain DH4 Amel_4.0_GroupUn genomic scaffold	CH877029	63875	1948	6	62
	Apis mellifera strain DH4 Amel_4.0_GroupUn genomic scaffold	CH877030	37256	1285	15	76
	Apis mellifera strain DH4 Amel_4.0_GroupUn genomic scaffold	CH877031	34659	1132	0	0
	Apis mellifera strain DH4 Amel_4.0_GroupUn genomic scaffold	CH877032	19086	665	0	0
	Apis mellifera strain DH4 Amel_4.0_GroupUn genomic scaffold	CH877033	58301	1999	0	0
	Apis mellifera strain DH4 Amel_4.0_GroupUn genomic scaffold	CH877034	62387	2268	8	26
	Apis mellifera strain DH4 Amel_4.0_GroupUn genomic scaffold	CH877035	18533	646	0	0
	Apis mellifera strain DH4 Amel_4.0_GroupUn genomic scaffold	CH877036	32731	1014	0	0
	Apis mellifera strain DH4 Amel_4.0_GroupUn genomic scaffold	CH877037	12832	385	0	0
	Apis mellifera strain DH4 Amel_4.0_GroupUn genomic scaffold	CH877038	42238	1485	9	79
	Apis mellifera strain DH4 Amel_4.0_GroupUn genomic scaffold	CH877039	21704	721	0	0
	Apis mellifera strain DH4 Amel_4.0_GroupUn genomic scaffold	CH877040	20117	511	3	10
	Apis mellifera strain DH4 Amel_4.0_GroupUn genomic scaffold	CH877041	25367	865	0	0
	Apis mellifera strain DH4 Amel_4.0_GroupUn genomic scaffold	CH877042	45066	1637	10	58
	Apis mellifera strain DH4 Amel_4.0_GroupUn genomic scaffold	CH877043	11696	361	0	0
	Apis mellifera strain DH4 Amel_4.0_GroupUn genomic scaffold	CH877044	74620	2323	8	47
	Apis mellifera strain DH4 Amel_4.0_GroupUn genomic scaffold	CH877045	11978	74	0	0
	Apis mellifera strain DH4 Amel_4.0_GroupUn genomic scaffold	CH877046	29811	1032	6	86
	Apis mellifera strain DH4 Amel_4.0_GroupUn genomic scaffold	CH877047	17249	464	0	0
	Apis mellifera strain DH4 Amel_4.0_GroupUn genomic scaffold	CH877048	46379	1644	0	0
	Apis mellifera strain DH4 Amel_4.0_GroupUn genomic scaffold	CH877049	35074	1127	1	12
	Apis mellifera strain DH4 Amel_4.0_GroupUn genomic scaffold	CH877050	53944	1980	1	3
	Apis mellifera strain DH4 Amel_4.0_GroupUn genomic scaffold	CH877051	15367	50	0	0
	Apis mellifera strain DH4 Amel_4.0_GroupUn genomic scaffold	CH877052	21739	696	5	21
	Apis mellifera strain DH4 Amel_4.0_GroupUn genomic scaffold	CH877053	25837	787	0	0
	Apis mellifera strain DH4 Amel_4.0_GroupUn genomic scaffold	CH877054	53244	1709	9	47
	Apis mellifera strain DH4 Amel_4.0_GroupUn genomic scaffold	CH877055	37559	1295	0	0
	Apis mellifera strain DH4 Amel_4.0_GroupUn genomic scaffold	CH877056	19688	583	0	0
	Apis mellifera strain DH4 Amel_4.0_GroupUn genomic scaffold	CH877057	28256	919	4	20
	Apis mellifera strain DH4 Amel_4.0_GroupUn genomic scaffold	CH877058	7489	48	0	0
	Apis mellifera strain DH4 Amel_4.0_GroupUn genomic scaffold	CH877059	84733	3088	8	50
	Apis mellifera strain DH4 Amel_4.0_GroupUn genomic scaffold	CH877060	44815	1434	6	31
	Apis mellifera strain DH4 Amel_4.0_GroupUn genomic scaffold	CH877061	31210	400	1	1
	Apis mellifera strain DH4 Amel_4.0_GroupUn genomic scaffold	CH877062	11837	360	0	0
	Apis mellifera strain DH4 Amel_4.0_GroupUn genomic scaffold	CH877063	28538	927	0	0
	Apis mellifera strain DH4 Amel_4.0_GroupUn genomic scaffold	CH877064	59541	284	0	0
	Apis mellifera strain DH4 Amel_4.0_GroupUn genomic scaffold	CH877065	30859	983	6	42
	Apis mellifera strain DH4 Amel_4.0_GroupUn genomic scaffold	CH877066	33404	1051	8	33
	Apis mellifera strain DH4 Amel_4.0_GroupUn genomic scaffold	CH877067	70848	2589	21	112
	Apis mellifera strain DH4 Amel_4.0_GroupUn genomic scaffold	CH877068	15421	496	1	5
	Apis mellifera strain DH4 Amel_4.0_GroupUn genomic scaffold	CH877069	35525	1219	0	0
	Apis mellifera strain DH4 Amel_4.0_GroupUn genomic scaffold	CH877070	23000	768	0	0
	Apis mellifera strain DH4 Amel_4.0_GroupUn genomic scaffold	CH877071	34993	1170	1	23
	Apis mellifera strain DH4 Amel_4.0_GroupUn genomic scaffold	CH877072	46272	1661	0	0
	Apis mellifera strain DH4 Amel_4.0_GroupUn genomic scaffold	CH877073	19993	167	0	0
	Apis mellifera strain DH4 Amel_4.0_GroupUn genomic scaffold	CH877074	20192	209	0	0
	Apis mellifera strain DH4 Amel_4.0_GroupUn genomic scaffold	CH877075	20209	643	5	29
	Apis mellifera strain DH4 Amel_4.0_GroupUn genomic scaffold	CH877076	40308	1436	7	75
	Apis mellifera strain DH4 Amel_4.0_GroupUn genomic scaffold	CH877077	9012	290	0	0
	Apis mellifera strain DH4 Amel_4.0_GroupUn genomic scaffold	CH877078	9459	273	0	0
	Apis mellifera strain DH4 Amel_4.0_GroupUn genomic scaffold	CH877079	28435	1006	0	0
	Apis mellifera strain DH4 Amel_4.0_GroupUn genomic scaffold	CH877080	15670	508	2	27
	Apis mellifera strain DH4 Amel_4.0_GroupUn genomic scaffold	CH877081	44032	1530	4	40
	Apis mellifera strain DH4 Amel_4.0_GroupUn genomic scaffold	CH877082	6104	191	0	0
	Apis mellifera strain DH4 Amel_4.0_GroupUn genomic scaffold	CH877083	16891	548	0	0
	Apis mellifera strain DH4 Amel_4.0_GroupUn genomic scaffold	CH877084	6939	201	0	0
	Apis mellifera strain DH4 Amel_4.0_GroupUn genomic scaffold	CH877085	51585	1708	0	0
	Apis mellifera strain DH4 Amel_4.0_GroupUn genomic scaffold	CH877086	42732	1527	0	0
	Apis mellifera strain DH4 Amel_4.0_GroupUn genomic scaffold	CH877087	74338	2630	18	90
	Apis mellifera strain DH4 Amel_4.0_GroupUn genomic scaffold	CH877088	57916	1666	2	20
	Apis mellifera strain DH4 Amel_4.0_GroupUn genomic scaffold	CH877089	15269	446	0	0
	Apis mellifera strain DH4 Amel_4.0_GroupUn genomic scaffold	CH877090	15008	541	0	0
	Apis mellifera strain DH4 Amel_4.0_GroupUn genomic scaffold	CH877091	21864	752	5	23
	Apis mellifera strain DH4 Amel_4.0_GroupUn genomic scaffold	CH877092	13160	326	4	15
	Apis mellifera strain DH4 Amel_4.0_GroupUn genomic scaffold	CH877093	39887	1334	2	12
	Apis mellifera strain DH4 Amel_4.0_GroupUn genomic scaffold	CH877094	8480	292	0	0
	Apis mellifera strain DH4 Amel_4.0_GroupUn genomic scaffold	CH877095	58601	2032	0	0
	Apis mellifera strain DH4 Amel_4.0_GroupUn genomic scaffold	CH877096	9328	286	0	0
	Apis mellifera strain DH4 Amel_4.0_GroupUn genomic scaffold	CH877097	15054	533	0	0
	Apis mellifera strain DH4 Amel_4.0_GroupUn genomic scaffold	CH877098	21934	547	0	0
	Apis mellifera strain DH4 Amel_4.0_GroupUn genomic scaffold	CH877099	15991	522	0	0
	Apis mellifera strain DH4 Amel_4.0_GroupUn genomic scaffold	CH877100	18167	168	0	0
	Apis mellifera strain DH4 Amel_4.0_GroupUn genomic scaffold	CH877101	12470	350	0	0
	Apis mellifera strain DH4 Amel_4.0_GroupUn genomic scaffold	CH877102	10626	324	1	2
	Apis mellifera strain DH4 Amel_4.0_GroupUn genomic scaffold	CH877103	54743	1334	0	0
	Apis mellifera strain DH4 Amel_4.0_GroupUn genomic scaffold	CH877104	13126	410	2	30
	Apis mellifera strain DH4 Amel_4.0_GroupUn genomic scaffold	CH877105	13411	432	0	0
	Apis mellifera strain DH4 Amel_4.0_GroupUn genomic scaffold	CH877106	44913	854	1	2
	Apis mellifera strain DH4 Amel_4.0_GroupUn genomic scaffold	CH877107	53830	1804	2	11
	Apis mellifera strain DH4 Amel_4.0_GroupUn genomic scaffold	CH877108	12256	359	0	0
	Apis mellifera strain DH4 Amel_4.0_GroupUn genomic scaffold	CH877109	27864	353	0	0
	Apis mellifera strain DH4 Amel_4.0_GroupUn genomic scaffold	CH877110	65345	2274	0	0
	Apis mellifera strain DH4 Amel_4.0_GroupUn genomic scaffold	CH877111	10999	350	1	3
	Apis mellifera strain DH4 Amel_4.0_GroupUn genomic scaffold	CH877112	26882	835	0	0
	Apis mellifera strain DH4 Amel_4.0_GroupUn genomic scaffold	CH877113	44868	1104	0	0
	Apis mellifera strain DH4 Amel_4.0_GroupUn genomic scaffold	CH877114	81893	2661	7	35
	Apis mellifera strain DH4 Amel_4.0_GroupUn genomic scaffold	CH877115	43876	1559	8	63
	Apis mellifera strain DH4 Amel_4.0_GroupUn genomic scaffold	CH877116	14521	504	0	0
	Apis mellifera strain DH4 Amel_4.0_GroupUn genomic scaffold	CH877117	22981	694	0	0
	Apis mellifera strain DH4 Amel_4.0_GroupUn genomic scaffold	CH877118	21420	663	0	0
	Apis mellifera strain DH4 Amel_4.0_GroupUn genomic scaffold	CH877119	22636	777	6	41
	Apis mellifera strain DH4 Amel_4.0_GroupUn genomic scaffold	CH877120	13766	339	2	6
	Apis mellifera strain DH4 Amel_4.0_GroupUn genomic scaffold	CH877121	16493	351	0	0
	Apis mellifera strain DH4 Amel_4.0_GroupUn genomic scaffold	CH877122	12741	438	3	27
	Apis mellifera strain DH4 Amel_4.0_GroupUn genomic scaffold	CH877123	35090	1238	0	0
	Apis mellifera strain DH4 Amel_4.0_GroupUn genomic scaffold	CH877124	16551	570	0	0
	Apis mellifera strain DH4 Amel_4.0_GroupUn genomic scaffold	CH877125	25188	843	1	1
	Apis mellifera strain DH4 Amel_4.0_GroupUn genomic scaffold	CH877126	14822	465	0	0
	Apis mellifera strain DH4 Amel_4.0_GroupUn genomic scaffold	CH877127	40530	1440	0	0
	Apis mellifera strain DH4 Amel_4.0_GroupUn genomic scaffold	CH877128	9039	310	0	0
	Apis mellifera strain DH4 Amel_4.0_GroupUn genomic scaffold	CH877129	63861	2187	16	107
	Apis mellifera strain DH4 Amel_4.0_GroupUn genomic scaffold	CH877130	18846	288	0	0
	Apis mellifera strain DH4 Amel_4.0_GroupUn genomic scaffold	CH877131	27042	851	3	26
	Apis mellifera strain DH4 Amel_4.0_GroupUn genomic scaffold	CH877132	13537	454	5	22
	Apis mellifera strain DH4 Amel_4.0_GroupUn genomic scaffold	CH877133	12033	359	0	0
	Apis mellifera strain DH4 Amel_4.0_GroupUn genomic scaffold	CH877134	19589	579	1	19
	Apis mellifera strain DH4 Amel_4.0_GroupUn genomic scaffold	CH877135	17061	554	0	0
	Apis mellifera strain DH4 Amel_4.0_GroupUn genomic scaffold	CH877136	25762	842	6	32
	Apis mellifera strain DH4 Amel_4.0_GroupUn genomic scaffold	CH877137	67960	428	0	0
	Apis mellifera strain DH4 Amel_4.0_GroupUn genomic scaffold	CH877138	43579	1530	11	77
	Apis mellifera strain DH4 Amel_4.0_GroupUn genomic scaffold	CH877139	20159	645	0	0
	Apis mellifera strain DH4 Amel_4.0_GroupUn genomic scaffold	CH877140	9419	269	0	0
	Apis mellifera strain DH4 Amel_4.0_GroupUn genomic scaffold	CH877141	24206	392	0	0
	Apis mellifera strain DH4 Amel_4.0_GroupUn genomic scaffold	CH877142	14623	415	2	6
	Apis mellifera strain DH4 Amel_4.0_GroupUn genomic scaffold	CH877143	6470	199	1	4
	Apis mellifera strain DH4 Amel_4.0_GroupUn genomic scaffold	CH877144	9555	305	0	0
	Apis mellifera strain DH4 Amel_4.0_GroupUn genomic scaffold	CH877145	11481	397	0	0
	Apis mellifera strain DH4 Amel_4.0_GroupUn genomic scaffold	CH877146	21992	713	0	0
	Apis mellifera strain DH4 Amel_4.0_GroupUn genomic scaffold	CH877147	11990	106	0	0
	Apis mellifera strain DH4 Amel_4.0_GroupUn genomic scaffold	CH877148	11065	376	2	4
	Apis mellifera strain DH4 Amel_4.0_GroupUn genomic scaffold	CH877149	11574	368	0	0
	Apis mellifera strain DH4 Amel_4.0_GroupUn genomic scaffold	CH877150	24697	690	0	0
	Apis mellifera strain DH4 Amel_4.0_GroupUn genomic scaffold	CH877151	65468	2296	4	44
	Apis mellifera strain DH4 Amel_4.0_GroupUn genomic scaffold	CH877152	36906	1202	1	6
	Apis mellifera strain DH4 Amel_4.0_GroupUn genomic scaffold	CH877153	37873	1263	0	0
	Apis mellifera strain DH4 Amel_4.0_GroupUn genomic scaffold	CH877154	8728	265	0	0
	Apis mellifera strain DH4 Amel_4.0_GroupUn genomic scaffold	CH877155	59035	2024	4	29
	Apis mellifera strain DH4 Amel_4.0_GroupUn genomic scaffold	CH877156	34534	1103	0	0
	Apis mellifera strain DH4 Amel_4.0_GroupUn genomic scaffold	CH877157	56185	1674	12	64
	Apis mellifera strain DH4 Amel_4.0_GroupUn genomic scaffold	CH877158	43267	1605	8	50
	Apis mellifera strain DH4 Amel_4.0_GroupUn genomic scaffold	CH877159	14968	379	0	0
	Apis mellifera strain DH4 Amel_4.0_GroupUn genomic scaffold	CH877160	31472	929	6	23
	Apis mellifera strain DH4 Amel_4.0_GroupUn genomic scaffold	CH877161	15873	522	0	0
	Apis mellifera strain DH4 Amel_4.0_GroupUn genomic scaffold	CH877162	33556	1121	4	46
	Apis mellifera strain DH4 Amel_4.0_GroupUn genomic scaffold	CH877163	7914	106	0	0
	Apis mellifera strain DH4 Amel_4.0_GroupUn genomic scaffold	CH877164	8347	223	0	0
	Apis mellifera strain DH4 Amel_4.0_GroupUn genomic scaffold	CH877165	17969	581	4	12
	Apis mellifera strain DH4 Amel_4.0_GroupUn genomic scaffold	CH877166	20093	672	0	0
	Apis mellifera strain DH4 Amel_4.0_GroupUn genomic scaffold	CH877167	59827	2112	19	104
	Apis mellifera strain DH4 Amel_4.0_GroupUn genomic scaffold	CH877168	15911	540	1	6
	Apis mellifera strain DH4 Amel_4.0_GroupUn genomic scaffold	CH877169	31574	1023	2	11
	Apis mellifera strain DH4 Amel_4.0_GroupUn genomic scaffold	CH877170	14267	345	0	0
	Apis mellifera strain DH4 Amel_4.0_GroupUn genomic scaffold	CH877171	18300	643	4	24
	Apis mellifera strain DH4 Amel_4.0_GroupUn genomic scaffold	CH877172	42821	1125	3	6
	Apis mellifera strain DH4 Amel_4.0_GroupUn genomic scaffold	CH877173	29615	1061	4	16
	Apis mellifera strain DH4 Amel_4.0_GroupUn genomic scaffold	CH877174	30949	1091	1	1
	Apis mellifera strain DH4 Amel_4.0_GroupUn genomic scaffold	CH877175	9748	292	1	1
	Apis mellifera strain DH4 Amel_4.0_GroupUn genomic scaffold	CH877176	18745	591	0	0
	Apis mellifera strain DH4 Amel_4.0_GroupUn genomic scaffold	CH877177	61982	1735	3	17
	Apis mellifera strain DH4 Amel_4.0_GroupUn genomic scaffold	CH877178	45552	1630	16	91
	Apis mellifera strain DH4 Amel_4.0_GroupUn genomic scaffold	CH877179	30335	932	8	40
	Apis mellifera strain DH4 Amel_4.0_GroupUn genomic scaffold	CH877180	21029	667	0	0
	Apis mellifera strain DH4 Amel_4.0_GroupUn genomic scaffold	CH877181	30061	1007	1	4
	Apis mellifera strain DH4 Amel_4.0_GroupUn genomic scaffold	CH877182	23412	757	1	1
	Apis mellifera strain DH4 Amel_4.0_GroupUn genomic scaffold	CH877183	12896	413	2	10
	Apis mellifera strain DH4 Amel_4.0_GroupUn genomic scaffold	CH877184	20081	654	0	0
	Apis mellifera strain DH4 Amel_4.0_GroupUn genomic scaffold	CH877185	43677	1551	3	15
	Apis mellifera strain DH4 Amel_4.0_GroupUn genomic scaffold	CH877186	6992	222	0	0
	Apis mellifera strain DH4 Amel_4.0_GroupUn genomic scaffold	CH877187	55727	1567	10	47
	Apis mellifera strain DH4 Amel_4.0_GroupUn genomic scaffold	CH877188	25601	870	5	19
	Apis mellifera strain DH4 Amel_4.0_GroupUn genomic scaffold	CH877189	13011	433	0	0
	Apis mellifera strain DH4 Amel_4.0_GroupUn genomic scaffold	CH877190	12018	361	0	0
	Apis mellifera strain DH4 Amel_4.0_GroupUn genomic scaffold	CH877191	52417	1678	7	41
	Apis mellifera strain DH4 Amel_4.0_GroupUn genomic scaffold	CH877192	44418	1327	1	2
	Apis mellifera strain DH4 Amel_4.0_GroupUn genomic scaffold	CH877193	16029	391	1	4
	Apis mellifera strain DH4 Amel_4.0_GroupUn genomic scaffold	CH877194	19886	447	0	0
	Apis mellifera strain DH4 Amel_4.0_GroupUn genomic scaffold	CH877195	9355	303	0	0
	Apis mellifera strain DH4 Amel_4.0_GroupUn genomic scaffold	CH877196	10517	329	0	0
	Apis mellifera strain DH4 Amel_4.0_GroupUn genomic scaffold	CH877197	20528	668	1	6
	Apis mellifera strain DH4 Amel_4.0_GroupUn genomic scaffold	CH877198	18151	593	0	0
	Apis mellifera strain DH4 Amel_4.0_GroupUn genomic scaffold	CH877199	32822	1087	2	12
	Apis mellifera strain DH4 Amel_4.0_GroupUn genomic scaffold	CH877200	28469	951	0	0
	Apis mellifera strain DH4 Amel_4.0_GroupUn genomic scaffold	CH877201	18845	610	0	0
	Apis mellifera strain DH4 Amel_4.0_GroupUn genomic scaffold	CH877202	19102	403	0	0
	Apis mellifera strain DH4 Amel_4.0_GroupUn genomic scaffold	CH877203	9310	272	0	0
	Apis mellifera strain DH4 Amel_4.0_GroupUn genomic scaffold	CH877204	4631	30	0	0
	Apis mellifera strain DH4 Amel_4.0_GroupUn genomic scaffold	CH877205	48792	1702	2	10
	Apis mellifera strain DH4 Amel_4.0_GroupUn genomic scaffold	CH877206	34532	983	5	24
	Apis mellifera strain DH4 Amel_4.0_GroupUn genomic scaffold	CH877207	48506	1688	0	0
	Apis mellifera strain DH4 Amel_4.0_GroupUn genomic scaffold	CH877208	22928	759	1	2
	Apis mellifera strain DH4 Amel_4.0_GroupUn genomic scaffold	CH877209	36449	1207	2	12
	Apis mellifera strain DH4 Amel_4.0_GroupUn genomic scaffold	CH877210	27252	870	2	2
	Apis mellifera strain DH4 Amel_4.0_GroupUn genomic scaffold	CH877211	25073	846	0	0
	Apis mellifera strain DH4 Amel_4.0_GroupUn genomic scaffold	CH877212	36548	1262	10	47
	Apis mellifera strain DH4 Amel_4.0_GroupUn genomic scaffold	CH877213	8826	247	0	0
	Apis mellifera strain DH4 Amel_4.0_GroupUn genomic scaffold	CH877214	20554	609	0	0
	Apis mellifera strain DH4 Amel_4.0_GroupUn genomic scaffold	CH877215	55863	1889	0	0
	Apis mellifera strain DH4 Amel_4.0_GroupUn genomic scaffold	CH877216	7673	219	0	0
	Apis mellifera strain DH4 Amel_4.0_GroupUn genomic scaffold	CH877217	8722	281	0	0
	Apis mellifera strain DH4 Amel_4.0_GroupUn genomic scaffold	CH877218	31287	1089	0	0
	Apis mellifera strain DH4 Amel_4.0_GroupUn genomic scaffold	CH877219	34276	993	1	15
	Apis mellifera strain DH4 Amel_4.0_GroupUn genomic scaffold	CH877220	8084	257	0	0
	Apis mellifera strain DH4 Amel_4.0_GroupUn genomic scaffold	CH877221	29164	922	0	0
	Apis mellifera strain DH4 Amel_4.0_GroupUn genomic scaffold	CH877222	29429	886	3	32
	Apis mellifera strain DH4 Amel_4.0_GroupUn genomic scaffold	CH877223	21050	682	2	17
	Apis mellifera strain DH4 Amel_4.0_GroupUn genomic scaffold	CH877224	15228	458	0	0
	Apis mellifera strain DH4 Amel_4.0_GroupUn genomic scaffold	CH877225	16755	481	0	0
	Apis mellifera strain DH4 Amel_4.0_GroupUn genomic scaffold	CH877226	26868	893	2	4
	Apis mellifera strain DH4 Amel_4.0_GroupUn genomic scaffold	CH877227	9742	283	0	0
	Apis mellifera strain DH4 Amel_4.0_GroupUn genomic scaffold	CH877228	65373	1973	1	2
	Apis mellifera strain DH4 Amel_4.0_GroupUn genomic scaffold	CH877229	15821	547	0	0
	Apis mellifera strain DH4 Amel_4.0_GroupUn genomic scaffold	CH877230	35867	1234	9	46
	Apis mellifera strain DH4 Amel_4.0_GroupUn genomic scaffold	CH877231	27430	953	0	0
	Apis mellifera strain DH4 Amel_4.0_GroupUn genomic scaffold	CH877232	10635	305	0	0
	Apis mellifera strain DH4 Amel_4.0_GroupUn genomic scaffold	CH877233	44828	885	6	25
	Apis mellifera strain DH4 Amel_4.0_GroupUn genomic scaffold	CH877234	35430	1176	3	13
	Apis mellifera strain DH4 Amel_4.0_GroupUn genomic scaffold	CH877235	11575	165	0	0
	Apis mellifera strain DH4 Amel_4.0_GroupUn genomic scaffold	CH877236	34035	1199	3	21
	Apis mellifera strain DH4 Amel_4.0_GroupUn genomic scaffold	CH877237	14236	360	0	0
	Apis mellifera strain DH4 Amel_4.0_GroupUn genomic scaffold	CH877238	13474	457	0	0
	Apis mellifera strain DH4 Amel_4.0_GroupUn genomic scaffold	CH877239	10975	356	2	16
	Apis mellifera strain DH4 Amel_4.0_GroupUn genomic scaffold	CH877240	12455	385	0	0
	Apis mellifera strain DH4 Amel_4.0_GroupUn genomic scaffold	CH877241	9704	98	0	0
	Apis mellifera strain DH4 Amel_4.0_GroupUn genomic scaffold	CH877242	24054	789	2	20
	Apis mellifera strain DH4 Amel_4.0_GroupUn genomic scaffold	CH877243	10086	287	0	0
	Apis mellifera strain DH4 Amel_4.0_GroupUn genomic scaffold	CH877244	42337	1478	10	53
	Apis mellifera strain DH4 Amel_4.0_GroupUn genomic scaffold	CH877245	13824	454	0	0
	Apis mellifera strain DH4 Amel_4.0_GroupUn genomic scaffold	CH877246	22604	714	4	42
	Apis mellifera strain DH4 Amel_4.0_GroupUn genomic scaffold	CH877247	10879	365	0	0
	Apis mellifera strain DH4 Amel_4.0_GroupUn genomic scaffold	CH877248	7905	251	0	0
	Apis mellifera strain DH4 Amel_4.0_GroupUn genomic scaffold	CH877249	11161	323	0	0
	Apis mellifera strain DH4 Amel_4.0_GroupUn genomic scaffold	CH877250	27526	921	7	39
	Apis mellifera strain DH4 Amel_4.0_GroupUn genomic scaffold	CH877251	3952	110	0	0
	Apis mellifera strain DH4 Amel_4.0_GroupUn genomic scaffold	CH877252	10995	341	2	6
	Apis mellifera strain DH4 Amel_4.0_GroupUn genomic scaffold	CH877253	53365	517	0	0
	Apis mellifera strain DH4 Amel_4.0_GroupUn genomic scaffold	CH877254	14983	184	0	0
	Apis mellifera strain DH4 Amel_4.0_GroupUn genomic scaffold	CH877255	50361	1791	0	0
	Apis mellifera strain DH4 Amel_4.0_GroupUn genomic scaffold	CH877256	19604	655	2	26
	Apis mellifera strain DH4 Amel_4.0_GroupUn genomic scaffold	CH877257	11459	390	0	0
	Apis mellifera strain DH4 Amel_4.0_GroupUn genomic scaffold	CH877258	33589	840	0	0
	Apis mellifera strain DH4 Amel_4.0_GroupUn genomic scaffold	CH877259	25398	877	2	7
	Apis mellifera strain DH4 Amel_4.0_GroupUn genomic scaffold	CH877260	11627	143	0	0
	Apis mellifera strain DH4 Amel_4.0_GroupUn genomic scaffold	CH877261	51812	316	0	0
	Apis mellifera strain DH4 Amel_4.0_GroupUn genomic scaffold	CH877262	24732	812	4	19
	Apis mellifera strain DH4 Amel_4.0_GroupUn genomic scaffold	CH877263	11668	348	2	11
	Apis mellifera strain DH4 Amel_4.0_GroupUn genomic scaffold	CH877264	56024	322	0	0
	Apis mellifera strain DH4 Amel_4.0_GroupUn genomic scaffold	CH877265	58033	2071	2	16
	Apis mellifera strain DH4 Amel_4.0_GroupUn genomic scaffold	CH877266	47582	1441	12	75
	Apis mellifera strain DH4 Amel_4.0_GroupUn genomic scaffold	CH877267	23771	738	0	0
	Apis mellifera strain DH4 Amel_4.0_GroupUn genomic scaffold	CH877268	12471	312	0	0
	Apis mellifera strain DH4 Amel_4.0_GroupUn genomic scaffold	CH877269	15224	490	6	27
	Apis mellifera strain DH4 Amel_4.0_GroupUn genomic scaffold	CH877270	11095	301	0	0
	Apis mellifera strain DH4 Amel_4.0_GroupUn genomic scaffold	CH877271	7514	237	1	4
	Apis mellifera strain DH4 Amel_4.0_GroupUn genomic scaffold	CH877272	7917	258	3	20
	Apis mellifera strain DH4 Amel_4.0_GroupUn genomic scaffold	CH877273	7420	231	0	0
	Apis mellifera strain DH4 Amel_4.0_GroupUn genomic scaffold	CH877274	15329	558	0	0
	Apis mellifera strain DH4 Amel_4.0_GroupUn genomic scaffold	CH877275	68373	2339	0	0
	Apis mellifera strain DH4 Amel_4.0_GroupUn genomic scaffold	CH877276	7558	234	0	0
	Apis mellifera strain DH4 Amel_4.0_GroupUn genomic scaffold	CH877277	10542	350	0	0
	Apis mellifera strain DH4 Amel_4.0_GroupUn genomic scaffold	CH877278	9048	266	0	0
	Apis mellifera strain DH4 Amel_4.0_GroupUn genomic scaffold	CH877279	20919	682	0	0
	Apis mellifera strain DH4 Amel_4.0_GroupUn genomic scaffold	CH877280	21060	558	0	0
	Apis mellifera strain DH4 Amel_4.0_GroupUn genomic scaffold	CH877281	4493	2	0	0
	Apis mellifera strain DH4 Amel_4.0_GroupUn genomic scaffold	CH877282	12526	442	0	0
	Apis mellifera strain DH4 Amel_4.0_GroupUn genomic scaffold	CH877283	28203	286	0	0
	Apis mellifera strain DH4 Amel_4.0_GroupUn genomic scaffold	CH877284	15712	69	0	0
	Apis mellifera strain DH4 Amel_4.0_GroupUn genomic scaffold	CH877285	31877	1095	5	29
	Apis mellifera strain DH4 Amel_4.0_GroupUn genomic scaffold	CH877286	11990	167	0	0
	Apis mellifera strain DH4 Amel_4.0_GroupUn genomic scaffold	CH877287	6874	125	1	1
	Apis mellifera strain DH4 Amel_4.0_GroupUn genomic scaffold	CH877288	15538	425	2	2
	Apis mellifera strain DH4 Amel_4.0_GroupUn genomic scaffold	CH877289	29439	1053	11	48
	Apis mellifera strain DH4 Amel_4.0_GroupUn genomic scaffold	CH877290	4835	139	0	0
	Apis mellifera strain DH4 Amel_4.0_GroupUn genomic scaffold	CH877291	27419	940	5	24
	Apis mellifera strain DH4 Amel_4.0_GroupUn genomic scaffold	CH877292	21740	763	4	25
	Apis mellifera strain DH4 Amel_4.0_GroupUn genomic scaffold	CH877293	14457	495	0	0
	Apis mellifera strain DH4 Amel_4.0_GroupUn genomic scaffold	CH877294	5621	143	0	0
	Apis mellifera strain DH4 Amel_4.0_GroupUn genomic scaffold	CH877295	13804	485	1	9
	Apis mellifera strain DH4 Amel_4.0_GroupUn genomic scaffold	CH877296	9948	233	0	0
	Apis mellifera strain DH4 Amel_4.0_GroupUn genomic scaffold	CH877297	51579	1792	1	6
	Apis mellifera strain DH4 Amel_4.0_GroupUn genomic scaffold	CH877298	7884	211	0	0
	Apis mellifera strain DH4 Amel_4.0_GroupUn genomic scaffold	CH877299	5837	172	0	0
	Apis mellifera strain DH4 Amel_4.0_GroupUn genomic scaffold	CH877300	68292	2374	21	179
	Apis mellifera strain DH4 Amel_4.0_GroupUn genomic scaffold	CH877301	3996	23	0	0
	Apis mellifera strain DH4 Amel_4.0_GroupUn genomic scaffold	CH877302	21784	596	4	22
	Apis mellifera strain DH4 Amel_4.0_GroupUn genomic scaffold	CH877303	59973	2033	8	60
	Apis mellifera strain DH4 Amel_4.0_GroupUn genomic scaffold	CH877304	10910	364	0	0
	Apis mellifera strain DH4 Amel_4.0_GroupUn genomic scaffold	CH877305	23991	804	6	34
	Apis mellifera strain DH4 Amel_4.0_GroupUn genomic scaffold	CH877306	71997	2212	0	0
	Apis mellifera strain DH4 Amel_4.0_GroupUn genomic scaffold	CH877307	6992	230	0	0
	Apis mellifera strain DH4 Amel_4.0_GroupUn genomic scaffold	CH877308	27329	954	8	70
	Apis mellifera strain DH4 Amel_4.0_GroupUn genomic scaffold	CH877309	5800	171	1	10
	Apis mellifera strain DH4 Amel_4.0_GroupUn genomic scaffold	CH877310	15269	496	8	63
	Apis mellifera strain DH4 Amel_4.0_GroupUn genomic scaffold	CH877311	35999	1227	0	0
	Apis mellifera strain DH4 Amel_4.0_GroupUn genomic scaffold	CH877312	21655	319	0	0
	Apis mellifera strain DH4 Amel_4.0_GroupUn genomic scaffold	CH877313	12495	420	0	0
	Apis mellifera strain DH4 Amel_4.0_GroupUn genomic scaffold	CH877314	24725	680	0	0
	Apis mellifera strain DH4 Amel_4.0_GroupUn genomic scaffold	CH877315	13566	443	0	0
	Apis mellifera strain DH4 Amel_4.0_GroupUn genomic scaffold	CH877316	22978	794	0	0
	Apis mellifera strain DH4 Amel_4.0_GroupUn genomic scaffold	CH877317	40678	1399	5	43
	Apis mellifera strain DH4 Amel_4.0_GroupUn genomic scaffold	CH877318	16265	523	1	17
	Apis mellifera strain DH4 Amel_4.0_GroupUn genomic scaffold	CH877319	9289	290	0	0
	Apis mellifera strain DH4 Amel_4.0_GroupUn genomic scaffold	CH877320	3501	111	0	0
	Apis mellifera strain DH4 Amel_4.0_GroupUn genomic scaffold	CH877321	71403	1710	1	4
	Apis mellifera strain DH4 Amel_4.0_GroupUn genomic scaffold	CH877322	67075	1864	12	44
	Apis mellifera strain DH4 Amel_4.0_GroupUn genomic scaffold	CH877323	17044	48	0	0
	Apis mellifera strain DH4 Amel_4.0_GroupUn genomic scaffold	CH877324	9229	259	0	0
	Apis mellifera strain DH4 Amel_4.0_GroupUn genomic scaffold	CH877325	16918	584	0	0
	Apis mellifera strain DH4 Amel_4.0_GroupUn genomic scaffold	CH877326	6674	141	0	0
	Apis mellifera strain DH4 Amel_4.0_GroupUn genomic scaffold	CH877327	26331	886	10	59
	Apis mellifera strain DH4 Amel_4.0_GroupUn genomic scaffold	CH877328	22825	772	2	15
	Apis mellifera strain DH4 Amel_4.0_GroupUn genomic scaffold	CH877329	6099	118	0	0
	Apis mellifera strain DH4 Amel_4.0_GroupUn genomic scaffold	CH877330	21491	342	0	0
	Apis mellifera strain DH4 Amel_4.0_GroupUn genomic scaffold	CH877331	21959	759	2	27
	Apis mellifera strain DH4 Amel_4.0_GroupUn genomic scaffold	CH877332	12212	400	0	0
	Apis mellifera strain DH4 Amel_4.0_GroupUn genomic scaffold	CH877333	6269	213	3	12
	Apis mellifera strain DH4 Amel_4.0_GroupUn genomic scaffold	CH877334	17999	295	2	4
	Apis mellifera strain DH4 Amel_4.0_GroupUn genomic scaffold	CH877335	11099	359	1	2
	Apis mellifera strain DH4 Amel_4.0_GroupUn genomic scaffold	CH877336	21293	748	1	10
	Apis mellifera strain DH4 Amel_4.0_GroupUn genomic scaffold	CH877337	22555	178	0	0
	Apis mellifera strain DH4 Amel_4.0_GroupUn genomic scaffold	CH877338	21992	742	3	23
	Apis mellifera strain DH4 Amel_4.0_GroupUn genomic scaffold	CH877339	17316	235	0	0
	Apis mellifera strain DH4 Amel_4.0_GroupUn genomic scaffold	CH877340	20540	646	0	0
	Apis mellifera strain DH4 Amel_4.0_GroupUn genomic scaffold	CH877341	5077	117	0	0
	Apis mellifera strain DH4 Amel_4.0_GroupUn genomic scaffold	CH877342	16615	528	8	23
	Apis mellifera strain DH4 Amel_4.0_GroupUn genomic scaffold	CH877343	63956	1771	0	0
	Apis mellifera strain DH4 Amel_4.0_GroupUn genomic scaffold	CH877344	15349	490	0	0
	Apis mellifera strain DH4 Amel_4.0_GroupUn genomic scaffold	CH877345	13133	234	0	0
	Apis mellifera strain DH4 Amel_4.0_GroupUn genomic scaffold	CH877346	18980	84	0	0
	Apis mellifera strain DH4 Amel_4.0_GroupUn genomic scaffold	CH877347	16926	575	0	0
	Apis mellifera strain DH4 Amel_4.0_GroupUn genomic scaffold	CH877348	9938	331	2	8
	Apis mellifera strain DH4 Amel_4.0_GroupUn genomic scaffold	CH877349	22074	746	1	2
	Apis mellifera strain DH4 Amel_4.0_GroupUn genomic scaffold	CH877350	9317	277	0	0
	Apis mellifera strain DH4 Amel_4.0_GroupUn genomic scaffold	CH877351	19665	646	6	36
	Apis mellifera strain DH4 Amel_4.0_GroupUn genomic scaffold	CH877352	21976	669	4	13
	Apis mellifera strain DH4 Amel_4.0_GroupUn genomic scaffold	CH877353	9031	274	0	0
	Apis mellifera strain DH4 Amel_4.0_GroupUn genomic scaffold	CH877354	14726	520	5	23
	Apis mellifera strain DH4 Amel_4.0_GroupUn genomic scaffold	CH877355	23224	806	2	12
	Apis mellifera strain DH4 Amel_4.0_GroupUn genomic scaffold	CH877356	19695	603	1	6
	Apis mellifera strain DH4 Amel_4.0_GroupUn genomic scaffold	CH877357	6792	231	0	0
	Apis mellifera strain DH4 Amel_4.0_GroupUn genomic scaffold	CH877358	9849	187	0	0
	Apis mellifera strain DH4 Amel_4.0_GroupUn genomic scaffold	CH877359	13269	469	0	0
	Apis mellifera strain DH4 Amel_4.0_GroupUn genomic scaffold	CH877360	15815	529	0	0
	Apis mellifera strain DH4 Amel_4.0_GroupUn genomic scaffold	CH877361	30032	1010	0	0
	Apis mellifera strain DH4 Amel_4.0_GroupUn genomic scaffold	CH877362	11722	68	0	0
	Apis mellifera strain DH4 Amel_4.0_GroupUn genomic scaffold	CH877363	38729	1308	0	0
	Apis mellifera strain DH4 Amel_4.0_GroupUn genomic scaffold	CH877364	21352	652	0	0
	Apis mellifera strain DH4 Amel_4.0_GroupUn genomic scaffold	CH877365	22704	724	2	9
	Apis mellifera strain DH4 Amel_4.0_GroupUn genomic scaffold	CH877366	12519	225	0	0
	Apis mellifera strain DH4 Amel_4.0_GroupUn genomic scaffold	CH877367	16561	511	1	6
	Apis mellifera strain DH4 Amel_4.0_GroupUn genomic scaffold	CH877368	27646	344	0	0
	Apis mellifera strain DH4 Amel_4.0_GroupUn genomic scaffold	CH877369	33096	1132	13	55
	Apis mellifera strain DH4 Amel_4.0_GroupUn genomic scaffold	CH877370	10516	329	0	0
	Apis mellifera strain DH4 Amel_4.0_GroupUn genomic scaffold	CH877371	7366	228	0	0
	Apis mellifera strain DH4 Amel_4.0_GroupUn genomic scaffold	CH877372	13371	455	0	0
	Apis mellifera strain DH4 Amel_4.0_GroupUn genomic scaffold	CH877373	27049	932	5	28
	Apis mellifera strain DH4 Amel_4.0_GroupUn genomic scaffold	CH877374	4808	116	0	0
	Apis mellifera strain DH4 Amel_4.0_GroupUn genomic scaffold	CH877375	11611	388	0	0
	Apis mellifera strain DH4 Amel_4.0_GroupUn genomic scaffold	CH877376	16509	543	1	2
	Apis mellifera strain DH4 Amel_4.0_GroupUn genomic scaffold	CH877377	23734	856	6	42
	Apis mellifera strain DH4 Amel_4.0_GroupUn genomic scaffold	CH877378	9116	312	0	0
	Apis mellifera strain DH4 Amel_4.0_GroupUn genomic scaffold	CH877379	5220	32	0	0
	Apis mellifera strain DH4 Amel_4.0_GroupUn genomic scaffold	CH877380	33779	1182	7	40
	Apis mellifera strain DH4 Amel_4.0_GroupUn genomic scaffold	CH877381	13206	424	0	0
	Apis mellifera strain DH4 Amel_4.0_GroupUn genomic scaffold	CH877382	22000	746	4	23
	Apis mellifera strain DH4 Amel_4.0_GroupUn genomic scaffold	CH877383	14714	493	1	9
	Apis mellifera strain DH4 Amel_4.0_GroupUn genomic scaffold	CH877384	7285	244	0	0
	Apis mellifera strain DH4 Amel_4.0_GroupUn genomic scaffold	CH877385	15119	131	0	0
	Apis mellifera strain DH4 Amel_4.0_GroupUn genomic scaffold	CH877386	41447	1311	6	34
	Apis mellifera strain DH4 Amel_4.0_GroupUn genomic scaffold	CH877387	14118	369	5	32
	Apis mellifera strain DH4 Amel_4.0_GroupUn genomic scaffold	CH877388	35303	655	0	0
	Apis mellifera strain DH4 Amel_4.0_GroupUn genomic scaffold	CH877389	61248	1227	0	0
	Apis mellifera strain DH4 Amel_4.0_GroupUn genomic scaffold	CH877390	24568	839	0	0
	Apis mellifera strain DH4 Amel_4.0_GroupUn genomic scaffold	CH877391	11624	259	0	0
	Apis mellifera strain DH4 Amel_4.0_GroupUn genomic scaffold	CH877392	13392	429	0	0
	Apis mellifera strain DH4 Amel_4.0_GroupUn genomic scaffold	CH877393	14041	253	0	0
	Apis mellifera strain DH4 Amel_4.0_GroupUn genomic scaffold	CH877394	19580	700	0	0
	Apis mellifera strain DH4 Amel_4.0_GroupUn genomic scaffold	CH877395	50979	1836	6	43
	Apis mellifera strain DH4 Amel_4.0_GroupUn genomic scaffold	CH877396	15198	480	0	0
	Apis mellifera strain DH4 Amel_4.0_GroupUn genomic scaffold	CH877397	6761	82	0	0
	Apis mellifera strain DH4 Amel_4.0_GroupUn genomic scaffold	CH877398	7299	226	0	0
	Apis mellifera strain DH4 Amel_4.0_GroupUn genomic scaffold	CH877399	31071	700	0	0
	Apis mellifera strain DH4 Amel_4.0_GroupUn genomic scaffold	CH877400	64741	2095	10	56
	Apis mellifera strain DH4 Amel_4.0_GroupUn genomic scaffold	CH877401	14861	503	0	0
	Apis mellifera strain DH4 Amel_4.0_GroupUn genomic scaffold	CH877402	18800	608	0	0
	Apis mellifera strain DH4 Amel_4.0_GroupUn genomic scaffold	CH877403	4319	30	0	0
	Apis mellifera strain DH4 Amel_4.0_GroupUn genomic scaffold	CH877404	32526	1136	1	1
	Apis mellifera strain DH4 Amel_4.0_GroupUn genomic scaffold	CH877405	10671	357	0	0
	Apis mellifera strain DH4 Amel_4.0_GroupUn genomic scaffold	CH877406	9572	158	0	0
	Apis mellifera strain DH4 Amel_4.0_GroupUn genomic scaffold	CH877407	11614	356	0	0
	Apis mellifera strain DH4 Amel_4.0_GroupUn genomic scaffold	CH877408	4766	84	1	2
	Apis mellifera strain DH4 Amel_4.0_GroupUn genomic scaffold	CH877409	20473	650	1	4
	Apis mellifera strain DH4 Amel_4.0_GroupUn genomic scaffold	CH877410	49045	1647	16	80
	Apis mellifera strain DH4 Amel_4.0_GroupUn genomic scaffold	CH877411	62981	2180	7	74
	Apis mellifera strain DH4 Amel_4.0_GroupUn genomic scaffold	CH877412	21579	715	6	40
	Apis mellifera strain DH4 Amel_4.0_GroupUn genomic scaffold	CH877413	9380	57	0	0
	Apis mellifera strain DH4 Amel_4.0_GroupUn genomic scaffold	CH877414	12865	432	4	22
	Apis mellifera strain DH4 Amel_4.0_GroupUn genomic scaffold	CH877415	15428	511	0	0
	Apis mellifera strain DH4 Amel_4.0_GroupUn genomic scaffold	CH877416	7955	245	0	0
	Apis mellifera strain DH4 Amel_4.0_GroupUn genomic scaffold	CH877417	35064	1255	9	56
	Apis mellifera strain DH4 Amel_4.0_GroupUn genomic scaffold	CH877418	14191	418	3	17
	Apis mellifera strain DH4 Amel_4.0_GroupUn genomic scaffold	CH877419	13321	449	0	0
	Apis mellifera strain DH4 Amel_4.0_GroupUn genomic scaffold	CH877420	7089	214	0	0
	Apis mellifera strain DH4 Amel_4.0_GroupUn genomic scaffold	CH877421	20539	654	2	19
	Apis mellifera strain DH4 Amel_4.0_GroupUn genomic scaffold	CH877422	6515	174	0	0
	Apis mellifera strain DH4 Amel_4.0_GroupUn genomic scaffold	CH877423	8271	242	2	4
	Apis mellifera strain DH4 Amel_4.0_GroupUn genomic scaffold	CH877424	21044	722	2	26
	Apis mellifera strain DH4 Amel_4.0_GroupUn genomic scaffold	CH877425	33364	288	0	0
	Apis mellifera strain DH4 Amel_4.0_GroupUn genomic scaffold	CH877426	7721	208	0	0
	Apis mellifera strain DH4 Amel_4.0_GroupUn genomic scaffold	CH877427	9426	73	0	0
	Apis mellifera strain DH4 Amel_4.0_GroupUn genomic scaffold	CH877428	24330	847	2	23
	Apis mellifera strain DH4 Amel_4.0_GroupUn genomic scaffold	CH877429	11386	103	0	0
	Apis mellifera strain DH4 Amel_4.0_GroupUn genomic scaffold	CH877430	36358	1318	0	0
	Apis mellifera strain DH4 Amel_4.0_GroupUn genomic scaffold	CH877431	17359	584	0	0
	Apis mellifera strain DH4 Amel_4.0_GroupUn genomic scaffold	CH877432	10014	309	3	9
	Apis mellifera strain DH4 Amel_4.0_GroupUn genomic scaffold	CH877433	6831	215	1	9
	Apis mellifera strain DH4 Amel_4.0_GroupUn genomic scaffold	CH877434	9954	264	0	0
	Apis mellifera strain DH4 Amel_4.0_GroupUn genomic scaffold	CH877435	15619	514	0	0
	Apis mellifera strain DH4 Amel_4.0_GroupUn genomic scaffold	CH877436	30939	920	0	0
	Apis mellifera strain DH4 Amel_4.0_GroupUn genomic scaffold	CH877437	10933	360	0	0
	Apis mellifera strain DH4 Amel_4.0_GroupUn genomic scaffold	CH877438	11140	324	0	0
	Apis mellifera strain DH4 Amel_4.0_GroupUn genomic scaffold	CH877439	46665	1695	3	17
	Apis mellifera strain DH4 Amel_4.0_GroupUn genomic scaffold	CH877440	9570	288	0	0
	Apis mellifera strain DH4 Amel_4.0_GroupUn genomic scaffold	CH877441	12359	407	0	0
	Apis mellifera strain DH4 Amel_4.0_GroupUn genomic scaffold	CH877442	21024	623	0	0
	Apis mellifera strain DH4 Amel_4.0_GroupUn genomic scaffold	CH877443	9721	320	0	0
	Apis mellifera strain DH4 Amel_4.0_GroupUn genomic scaffold	CH877444	33587	1157	0	0
	Apis mellifera strain DH4 Amel_4.0_GroupUn genomic scaffold	CH877445	14537	449	0	0
	Apis mellifera strain DH4 Amel_4.0_GroupUn genomic scaffold	CH877446	16466	567	4	16
	Apis mellifera strain DH4 Amel_4.0_GroupUn genomic scaffold	CH877447	8298	239	0	0
	Apis mellifera strain DH4 Amel_4.0_GroupUn genomic scaffold	CH877448	10474	339	0	0
	Apis mellifera strain DH4 Amel_4.0_GroupUn genomic scaffold	CH877449	39631	1455	4	76
	Apis mellifera strain DH4 Amel_4.0_GroupUn genomic scaffold	CH877450	43633	1263	5	64
	Apis mellifera strain DH4 Amel_4.0_GroupUn genomic scaffold	CH877451	6661	189	0	0
	Apis mellifera strain DH4 Amel_4.0_GroupUn genomic scaffold	CH877452	12125	344	0	0
	Apis mellifera strain DH4 Amel_4.0_GroupUn genomic scaffold	CH877453	16314	505	6	46
	Apis mellifera strain DH4 Amel_4.0_GroupUn genomic scaffold	CH877454	9268	145	0	0
	Apis mellifera strain DH4 Amel_4.0_GroupUn genomic scaffold	CH877455	7616	258	0	0
	Apis mellifera strain DH4 Amel_4.0_GroupUn genomic scaffold	CH877456	41479	1418	5	32
	Apis mellifera strain DH4 Amel_4.0_GroupUn genomic scaffold	CH877457	26696	293	1	1
	Apis mellifera strain DH4 Amel_4.0_GroupUn genomic scaffold	CH877458	12801	389	0	0
	Apis mellifera strain DH4 Amel_4.0_GroupUn genomic scaffold	CH877459	18709	613	5	22
	Apis mellifera strain DH4 Amel_4.0_GroupUn genomic scaffold	CH877460	9080	283	0	0
	Apis mellifera strain DH4 Amel_4.0_GroupUn genomic scaffold	CH877461	11765	284	0	0
	Apis mellifera strain DH4 Amel_4.0_GroupUn genomic scaffold	CH877462	5731	167	0	0
	Apis mellifera strain DH4 Amel_4.0_GroupUn genomic scaffold	CH877463	30099	999	1	1
	Apis mellifera strain DH4 Amel_4.0_GroupUn genomic scaffold	CH877464	7062	227	0	0
	Apis mellifera strain DH4 Amel_4.0_GroupUn genomic scaffold	CH877465	11490	297	0	0
	Apis mellifera strain DH4 Amel_4.0_GroupUn genomic scaffold	CH877466	9468	320	1	21
	Apis mellifera strain DH4 Amel_4.0_GroupUn genomic scaffold	CH877467	5359	142	0	0
	Apis mellifera strain DH4 Amel_4.0_GroupUn genomic scaffold	CH877468	7430	205	0	0
	Apis mellifera strain DH4 Amel_4.0_GroupUn genomic scaffold	CH877469	5686	160	0	0
	Apis mellifera strain DH4 Amel_4.0_GroupUn genomic scaffold	CH877470	43471	1413	0	0
	Apis mellifera strain DH4 Amel_4.0_GroupUn genomic scaffold	CH877471	6305	204	0	0
	Apis mellifera strain DH4 Amel_4.0_GroupUn genomic scaffold	CH877472	8169	256	1	3
	Apis mellifera strain DH4 Amel_4.0_GroupUn genomic scaffold	CH877473	9357	266	0	0
	Apis mellifera strain DH4 Amel_4.0_GroupUn genomic scaffold	CH877474	8233	284	0	0
	Apis mellifera strain DH4 Amel_4.0_GroupUn genomic scaffold	CH877475	4761	44	0	0
	Apis mellifera strain DH4 Amel_4.0_GroupUn genomic scaffold	CH877476	24999	786	0	0
	Apis mellifera strain DH4 Amel_4.0_GroupUn genomic scaffold	CH877477	39086	1344	10	68
	Apis mellifera strain DH4 Amel_4.0_GroupUn genomic scaffold	CH877478	17762	618	3	11
	Apis mellifera strain DH4 Amel_4.0_GroupUn genomic scaffold	CH877479	25589	906	5	27
	Apis mellifera strain DH4 Amel_4.0_GroupUn genomic scaffold	CH877480	9097	295	0	0
	Apis mellifera strain DH4 Amel_4.0_GroupUn genomic scaffold	CH877481	38906	1157	0	0
	Apis mellifera strain DH4 Amel_4.0_GroupUn genomic scaffold	CH877482	18703	327	0	0
	Apis mellifera strain DH4 Amel_4.0_GroupUn genomic scaffold	CH877483	7232	201	1	5
	Apis mellifera strain DH4 Amel_4.0_GroupUn genomic scaffold	CH877484	13887	369	1	9
	Apis mellifera strain DH4 Amel_4.0_GroupUn genomic scaffold	CH877485	21293	732	0	0
	Apis mellifera strain DH4 Amel_4.0_GroupUn genomic scaffold	CH877486	24974	874	0	0
	Apis mellifera strain DH4 Amel_4.0_GroupUn genomic scaffold	CH877487	12541	409	1	6
	Apis mellifera strain DH4 Amel_4.0_GroupUn genomic scaffold	CH877488	12285	373	0	0
	Apis mellifera strain DH4 Amel_4.0_GroupUn genomic scaffold	CH877489	15420	493	0	0
	Apis mellifera strain DH4 Amel_4.0_GroupUn genomic scaffold	CH877490	8168	227	1	4
	Apis mellifera strain DH4 Amel_4.0_GroupUn genomic scaffold	CH877491	13625	477	1	3
	Apis mellifera strain DH4 Amel_4.0_GroupUn genomic scaffold	CH877492	17547	619	0	0
	Apis mellifera strain DH4 Amel_4.0_GroupUn genomic scaffold	CH877493	25989	831	0	0
	Apis mellifera strain DH4 Amel_4.0_GroupUn genomic scaffold	CH877494	11393	358	0	0
	Apis mellifera strain DH4 Amel_4.0_GroupUn genomic scaffold	CH877495	9534	329	0	0
	Apis mellifera strain DH4 Amel_4.0_GroupUn genomic scaffold	CH877496	63593	1565	2	2
	Apis mellifera strain DH4 Amel_4.0_GroupUn genomic scaffold	CH877497	25682	880	0	0
	Apis mellifera strain DH4 Amel_4.0_GroupUn genomic scaffold	CH877498	32847	473	0	0
	Apis mellifera strain DH4 Amel_4.0_GroupUn genomic scaffold	CH877499	39418	1304	10	38
	Apis mellifera strain DH4 Amel_4.0_GroupUn genomic scaffold	CH877500	6269	183	1	2
	Apis mellifera strain DH4 Amel_4.0_GroupUn genomic scaffold	CH877501	14930	446	0	0
	Apis mellifera strain DH4 Amel_4.0_GroupUn genomic scaffold	CH877502	23046	767	0	0
	Apis mellifera strain DH4 Amel_4.0_GroupUn genomic scaffold	CH877503	15983	500	0	0
	Apis mellifera strain DH4 Amel_4.0_GroupUn genomic scaffold	CH877504	21913	716	4	22
	Apis mellifera strain DH4 Amel_4.0_GroupUn genomic scaffold	CH877505	21120	269	0	0
	Apis mellifera strain DH4 Amel_4.0_GroupUn genomic scaffold	CH877506	9871	310	1	4
	Apis mellifera strain DH4 Amel_4.0_GroupUn genomic scaffold	CH877507	9021	277	0	0
	Apis mellifera strain DH4 Amel_4.0_GroupUn genomic scaffold	CH877508	9002	282	3	16
	Apis mellifera strain DH4 Amel_4.0_GroupUn genomic scaffold	CH877509	15037	500	0	0
	Apis mellifera strain DH4 Amel_4.0_GroupUn genomic scaffold	CH877510	15760	526	3	10
	Apis mellifera strain DH4 Amel_4.0_GroupUn genomic scaffold	CH877511	43413	1521	1	22
	Apis mellifera strain DH4 Amel_4.0_GroupUn genomic scaffold	CH877512	8090	151	0	0
	Apis mellifera strain DH4 Amel_4.0_GroupUn genomic scaffold	CH877513	15658	543	2	7
	Apis mellifera strain DH4 Amel_4.0_GroupUn genomic scaffold	CH877514	14076	495	1	6
	Apis mellifera strain DH4 Amel_4.0_GroupUn genomic scaffold	CH877515	28950	914	7	49
	Apis mellifera strain DH4 Amel_4.0_GroupUn genomic scaffold	CH877516	21948	676	3	39
	Apis mellifera strain DH4 Amel_4.0_GroupUn genomic scaffold	CH877517	8094	253	2	4
	Apis mellifera strain DH4 Amel_4.0_GroupUn genomic scaffold	CH877518	51999	1778	7	49
	Apis mellifera strain DH4 Amel_4.0_GroupUn genomic scaffold	CH877519	19029	559	0	0
	Apis mellifera strain DH4 Amel_4.0_GroupUn genomic scaffold	CH877520	12848	435	1	10
	Apis mellifera strain DH4 Amel_4.0_GroupUn genomic scaffold	CH877521	15325	124	0	0
	Apis mellifera strain DH4 Amel_4.0_GroupUn genomic scaffold	CH877522	25105	830	3	11
	Apis mellifera strain DH4 Amel_4.0_GroupUn genomic scaffold	CH877523	18403	623	5	38
	Apis mellifera strain DH4 Amel_4.0_GroupUn genomic scaffold	CH877524	4531	70	0	0
	Apis mellifera strain DH4 Amel_4.0_GroupUn genomic scaffold	CH877525	13044	425	0	0
	Apis mellifera strain DH4 Amel_4.0_GroupUn genomic scaffold	CH877526	18512	592	0	0
	Apis mellifera strain DH4 Amel_4.0_GroupUn genomic scaffold	CH877527	10631	301	0	0
	Apis mellifera strain DH4 Amel_4.0_GroupUn genomic scaffold	CH877528	22509	578	1	5
	Apis mellifera strain DH4 Amel_4.0_GroupUn genomic scaffold	CH877529	5278	160	2	8
	Apis mellifera strain DH4 Amel_4.0_GroupUn genomic scaffold	CH877530	16061	306	0	0
	Apis mellifera strain DH4 Amel_4.0_GroupUn genomic scaffold	CH877531	8618	282	0	0
	Apis mellifera strain DH4 Amel_4.0_GroupUn genomic scaffold	CH877532	11432	392	0	0
	Apis mellifera strain DH4 Amel_4.0_GroupUn genomic scaffold	CH877533	7161	217	0	0
	Apis mellifera strain DH4 Amel_4.0_GroupUn genomic scaffold	CH877534	25911	892	3	36
	Apis mellifera strain DH4 Amel_4.0_GroupUn genomic scaffold	CH877535	7568	210	0	0
	Apis mellifera strain DH4 Amel_4.0_GroupUn genomic scaffold	CH877536	18358	669	0	0
	Apis mellifera strain DH4 Amel_4.0_GroupUn genomic scaffold	CH877537	6537	163	1	5
	Apis mellifera strain DH4 Amel_4.0_GroupUn genomic scaffold	CH877538	9716	305	0	0
	Apis mellifera strain DH4 Amel_4.0_GroupUn genomic scaffold	CH877539	12100	369	0	0
	Apis mellifera strain DH4 Amel_4.0_GroupUn genomic scaffold	CH877540	12345	380	1	10
	Apis mellifera strain DH4 Amel_4.0_GroupUn genomic scaffold	CH877541	26555	518	1	5
	Apis mellifera strain DH4 Amel_4.0_GroupUn genomic scaffold	CH877542	41203	1481	10	64
	Apis mellifera strain DH4 Amel_4.0_GroupUn genomic scaffold	CH877543	9279	296	0	0
	Apis mellifera strain DH4 Amel_4.0_GroupUn genomic scaffold	CH877544	9426	129	0	0
	Apis mellifera strain DH4 Amel_4.0_GroupUn genomic scaffold	CH877545	24784	786	4	5
	Apis mellifera strain DH4 Amel_4.0_GroupUn genomic scaffold	CH877546	10672	50	0	0
	Apis mellifera strain DH4 Amel_4.0_GroupUn genomic scaffold	CH877547	15771	515	7	25
	Apis mellifera strain DH4 Amel_4.0_GroupUn genomic scaffold	CH877548	10230	303	1	4
	Apis mellifera strain DH4 Amel_4.0_GroupUn genomic scaffold	CH877549	12445	397	0	0
	Apis mellifera strain DH4 Amel_4.0_GroupUn genomic scaffold	CH877550	5961	185	0	0
	Apis mellifera strain DH4 Amel_4.0_GroupUn genomic scaffold	CH877551	27146	949	0	0
	Apis mellifera strain DH4 Amel_4.0_GroupUn genomic scaffold	CH877552	14165	461	0	0
	Apis mellifera strain DH4 Amel_4.0_GroupUn genomic scaffold	CH877553	24163	808	0	0
	Apis mellifera strain DH4 Amel_4.0_GroupUn genomic scaffold	CH877554	6619	177	2	12
	Apis mellifera strain DH4 Amel_4.0_GroupUn genomic scaffold	CH877555	17173	447	1	5
	Apis mellifera strain DH4 Amel_4.0_GroupUn genomic scaffold	CH877556	12737	407	1	5
	Apis mellifera strain DH4 Amel_4.0_GroupUn genomic scaffold	CH877557	68694	2235	0	0
	Apis mellifera strain DH4 Amel_4.0_GroupUn genomic scaffold	CH877558	22486	776	0	0
	Apis mellifera strain DH4 Amel_4.0_GroupUn genomic scaffold	CH877559	19313	145	0	0
	Apis mellifera strain DH4 Amel_4.0_GroupUn genomic scaffold	CH877560	22996	790	0	0
	Apis mellifera strain DH4 Amel_4.0_GroupUn genomic scaffold	CH877561	16385	553	1	6
	Apis mellifera strain DH4 Amel_4.0_GroupUn genomic scaffold	CH877562	7310	235	0	0
	Apis mellifera strain DH4 Amel_4.0_GroupUn genomic scaffold	CH877563	15107	463	2	7
	Apis mellifera strain DH4 Amel_4.0_GroupUn genomic scaffold	CH877564	9940	357	0	0
	Apis mellifera strain DH4 Amel_4.0_GroupUn genomic scaffold	CH877565	2464	82	0	0
	Apis mellifera strain DH4 Amel_4.0_GroupUn genomic scaffold	CH877566	6801	67	0	0
	Apis mellifera strain DH4 Amel_4.0_GroupUn genomic scaffold	CH877567	15371	504	5	33
	Apis mellifera strain DH4 Amel_4.0_GroupUn genomic scaffold	CH877568	4223	124	0	0
	Apis mellifera strain DH4 Amel_4.0_GroupUn genomic scaffold	CH877569	11389	91	0	0
	Apis mellifera strain DH4 Amel_4.0_GroupUn genomic scaffold	CH877570	5597	166	0	0
	Apis mellifera strain DH4 Amel_4.0_GroupUn genomic scaffold	CH877571	32131	1160	7	24
	Apis mellifera strain DH4 Amel_4.0_GroupUn genomic scaffold	CH877572	10960	81	0	0
	Apis mellifera strain DH4 Amel_4.0_GroupUn genomic scaffold	CH877573	9375	309	0	0
	Apis mellifera strain DH4 Amel_4.0_GroupUn genomic scaffold	CH877574	3971	103	0	0
	Apis mellifera strain DH4 Amel_4.0_GroupUn genomic scaffold	CH877575	6253	196	1	6
	Apis mellifera strain DH4 Amel_4.0_GroupUn genomic scaffold	CH877576	3128	25	0	0
	Apis mellifera strain DH4 Amel_4.0_GroupUn genomic scaffold	CH877577	29601	923	1	3
	Apis mellifera strain DH4 Amel_4.0_GroupUn genomic scaffold	CH877578	15901	586	1	3
	Apis mellifera strain DH4 Amel_4.0_GroupUn genomic scaffold	CH877579	59489	1738	5	48
	Apis mellifera strain DH4 Amel_4.0_GroupUn genomic scaffold	CH877580	6090	183	0	0
	Apis mellifera strain DH4 Amel_4.0_GroupUn genomic scaffold	CH877581	10910	374	0	0
	Apis mellifera strain DH4 Amel_4.0_GroupUn genomic scaffold	CH877582	3253	93	0	0
	Apis mellifera strain DH4 Amel_4.0_GroupUn genomic scaffold	CH877583	67807	2342	1	2
	Apis mellifera strain DH4 Amel_4.0_GroupUn genomic scaffold	CH877584	5301	36	0	0
	Apis mellifera strain DH4 Amel_4.0_GroupUn genomic scaffold	CH877585	13504	126	0	0
	Apis mellifera strain DH4 Amel_4.0_GroupUn genomic scaffold	CH877586	12831	431	3	9
	Apis mellifera strain DH4 Amel_4.0_GroupUn genomic scaffold	CH877587	9292	298	0	0
	Apis mellifera strain DH4 Amel_4.0_GroupUn genomic scaffold	CH877588	18044	298	0	0
	Apis mellifera strain DH4 Amel_4.0_GroupUn genomic scaffold	CH877589	9050	323	0	0
	Apis mellifera strain DH4 Amel_4.0_GroupUn genomic scaffold	CH877590	4082	108	2	2
	Apis mellifera strain DH4 Amel_4.0_GroupUn genomic scaffold	CH877591	2550	72	0	0
	Apis mellifera strain DH4 Amel_4.0_GroupUn genomic scaffold	CH877592	10451	111	0	0
	Apis mellifera strain DH4 Amel_4.0_GroupUn genomic scaffold	CH877593	6015	45	0	0
	Apis mellifera strain DH4 Amel_4.0_GroupUn genomic scaffold	CH877594	22005	806	4	16
	Apis mellifera strain DH4 Amel_4.0_GroupUn genomic scaffold	CH877595	38101	1075	0	0
	Apis mellifera strain DH4 Amel_4.0_GroupUn genomic scaffold	CH877596	23973	838	2	14
	Apis mellifera strain DH4 Amel_4.0_GroupUn genomic scaffold	CH877597	3868	69	0	0
	Apis mellifera strain DH4 Amel_4.0_GroupUn genomic scaffold	CH877598	14078	218	0	0
	Apis mellifera strain DH4 Amel_4.0_GroupUn genomic scaffold	CH877599	12715	404	0	0
	Apis mellifera strain DH4 Amel_4.0_GroupUn genomic scaffold	CH877600	10622	80	0	0
	Apis mellifera strain DH4 Amel_4.0_GroupUn genomic scaffold	CH877601	3157	105	0	0
	Apis mellifera strain DH4 Amel_4.0_GroupUn genomic scaffold	CH877602	65906	1908	4	26
	Apis mellifera strain DH4 Amel_4.0_GroupUn genomic scaffold	CH877603	5776	56	0	0
	Apis mellifera strain DH4 Amel_4.0_GroupUn genomic scaffold	CH877604	5913	98	0	0
	Apis mellifera strain DH4 Amel_4.0_GroupUn genomic scaffold	CH877605	4931	132	1	1
	Apis mellifera strain DH4 Amel_4.0_GroupUn genomic scaffold	CH877606	3453	131	1	1
	Apis mellifera strain DH4 Amel_4.0_GroupUn genomic scaffold	CH877607	6710	218	0	0
	Apis mellifera strain DH4 Amel_4.0_GroupUn genomic scaffold	CH877608	8325	256	0	0
	Apis mellifera strain DH4 Amel_4.0_GroupUn genomic scaffold	CH877609	6285	150	0	0
	Apis mellifera strain DH4 Amel_4.0_GroupUn genomic scaffold	CH877610	3688	100	0	0
	Apis mellifera strain DH4 Amel_4.0_GroupUn genomic scaffold	CH877611	2166	73	0	0
	Apis mellifera strain DH4 Amel_4.0_GroupUn genomic scaffold	CH877612	6696	214	0	0
	Apis mellifera strain DH4 Amel_4.0_GroupUn genomic scaffold	CH877613	9572	333	0	0
	Apis mellifera strain DH4 Amel_4.0_GroupUn genomic scaffold	CH877614	15958	558	1	8
	Apis mellifera strain DH4 Amel_4.0_GroupUn genomic scaffold	CH877615	15229	509	0	0
	Apis mellifera strain DH4 Amel_4.0_GroupUn genomic scaffold	CH877616	5680	160	1	5
	Apis mellifera strain DH4 Amel_4.0_GroupUn genomic scaffold	CH877617	3902	103	0	0
	Apis mellifera strain DH4 Amel_4.0_GroupUn genomic scaffold	CH877618	4529	115	0	0
	Apis mellifera strain DH4 Amel_4.0_GroupUn genomic scaffold	CH877619	7625	250	0	0
	Apis mellifera strain DH4 Amel_4.0_GroupUn genomic scaffold	CH877620	24392	566	1	4
	Apis mellifera strain DH4 Amel_4.0_GroupUn genomic scaffold	CH877621	7452	50	0	0
	Apis mellifera strain DH4 Amel_4.0_GroupUn genomic scaffold	CH877622	4881	16	0	0
	Apis mellifera strain DH4 Amel_4.0_GroupUn genomic scaffold	CH877623	9874	66	0	0
	Apis mellifera strain DH4 Amel_4.0_GroupUn genomic scaffold	CH877624	7336	52	0	0
	Apis mellifera strain DH4 Amel_4.0_GroupUn genomic scaffold	CH877625	4335	137	0	0
	Apis mellifera strain DH4 Amel_4.0_GroupUn genomic scaffold	CH877626	3415	104	0	0
	Apis mellifera strain DH4 Amel_4.0_GroupUn genomic scaffold	CH877627	9035	268	0	0
	Apis mellifera strain DH4 Amel_4.0_GroupUn genomic scaffold	CH877628	4447	118	0	0
	Apis mellifera strain DH4 Amel_4.0_GroupUn genomic scaffold	CH877629	15046	536	3	16
	Apis mellifera strain DH4 Amel_4.0_GroupUn genomic scaffold	CH877630	7837	132	0	0
	Apis mellifera strain DH4 Amel_4.0_GroupUn genomic scaffold	CH877631	27160	923	0	0
	Apis mellifera strain DH4 Amel_4.0_GroupUn genomic scaffold	CH877632	13115	155	0	0
	Apis mellifera strain DH4 Amel_4.0_GroupUn genomic scaffold	CH877633	3074	82	0	0
	Apis mellifera strain DH4 Amel_4.0_GroupUn genomic scaffold	CH877634	14541	447	0	0
	Apis mellifera strain DH4 Amel_4.0_GroupUn genomic scaffold	CH877635	37207	1376	4	22
	Apis mellifera strain DH4 Amel_4.0_GroupUn genomic scaffold	CH877636	6150	8	0	0
	Apis mellifera strain DH4 Amel_4.0_GroupUn genomic scaffold	CH877637	11655	373	1	2
	Apis mellifera strain DH4 Amel_4.0_GroupUn genomic scaffold	CH877638	11365	399	1	1
	Apis mellifera strain DH4 Amel_4.0_GroupUn genomic scaffold	CH877639	16822	241	1	3
	Apis mellifera strain DH4 Amel_4.0_GroupUn genomic scaffold	CH877640	5558	106	0	0
	Apis mellifera strain DH4 Amel_4.0_GroupUn genomic scaffold	CH877641	18513	588	2	14
	Apis mellifera strain DH4 Amel_4.0_GroupUn genomic scaffold	CH877642	21392	669	2	10
	Apis mellifera strain DH4 Amel_4.0_GroupUn genomic scaffold	CH877643	4236	146	0	0
	Apis mellifera strain DH4 Amel_4.0_GroupUn genomic scaffold	CH877644	24266	830	0	0
	Apis mellifera strain DH4 Amel_4.0_GroupUn genomic scaffold	CH877645	4472	121	0	0
	Apis mellifera strain DH4 Amel_4.0_GroupUn genomic scaffold	CH877646	11996	387	0	0
	Apis mellifera strain DH4 Amel_4.0_GroupUn genomic scaffold	CH877647	7714	20	0	0
	Apis mellifera strain DH4 Amel_4.0_GroupUn genomic scaffold	CH877648	38139	1341	0	0
	Apis mellifera strain DH4 Amel_4.0_GroupUn genomic scaffold	CH877649	12219	425	0	0
	Apis mellifera strain DH4 Amel_4.0_GroupUn genomic scaffold	CH877650	25266	683	0	0
	Apis mellifera strain DH4 Amel_4.0_GroupUn genomic scaffold	CH877651	8445	295	0	0
	Apis mellifera strain DH4 Amel_4.0_GroupUn genomic scaffold	CH877652	17008	611	4	32
	Apis mellifera strain DH4 Amel_4.0_GroupUn genomic scaffold	CH877653	8668	267	0	0
	Apis mellifera strain DH4 Amel_4.0_GroupUn genomic scaffold	CH877654	22877	795	1	7
	Apis mellifera strain DH4 Amel_4.0_GroupUn genomic scaffold	CH877655	8007	22	0	0
	Apis mellifera strain DH4 Amel_4.0_GroupUn genomic scaffold	CH877656	2508	11	0	0
	Apis mellifera strain DH4 Amel_4.0_GroupUn genomic scaffold	CH877657	4027	123	1	3
	Apis mellifera strain DH4 Amel_4.0_GroupUn genomic scaffold	CH877658	22309	758	3	11
	Apis mellifera strain DH4 Amel_4.0_GroupUn genomic scaffold	CH877659	21454	721	2	12
	Apis mellifera strain DH4 Amel_4.0_GroupUn genomic scaffold	CH877660	5837	37	0	0
	Apis mellifera strain DH4 Amel_4.0_GroupUn genomic scaffold	CH877661	16294	514	4	23
	Apis mellifera strain DH4 Amel_4.0_GroupUn genomic scaffold	CH877662	4451	121	0	0
	Apis mellifera strain DH4 Amel_4.0_GroupUn genomic scaffold	CH877663	15171	96	0	0
	Apis mellifera strain DH4 Amel_4.0_GroupUn genomic scaffold	CH877664	8505	65	0	0
	Apis mellifera strain DH4 Amel_4.0_GroupUn genomic scaffold	CH877665	4712	155	0	0
	Apis mellifera strain DH4 Amel_4.0_GroupUn genomic scaffold	CH877666	11824	362	0	0
	Apis mellifera strain DH4 Amel_4.0_GroupUn genomic scaffold	CH877667	8792	276	1	8
	Apis mellifera strain DH4 Amel_4.0_GroupUn genomic scaffold	CH877668	5653	169	0	0
	Apis mellifera strain DH4 Amel_4.0_GroupUn genomic scaffold	CH877669	25055	342	0	0
	Apis mellifera strain DH4 Amel_4.0_GroupUn genomic scaffold	CH877670	11437	354	0	0
	Apis mellifera strain DH4 Amel_4.0_GroupUn genomic scaffold	CH877671	16137	524	3	14
	Apis mellifera strain DH4 Amel_4.0_GroupUn genomic scaffold	CH877672	10613	40	0	0
	Apis mellifera strain DH4 Amel_4.0_GroupUn genomic scaffold	CH877673	19999	212	0	0
	Apis mellifera strain DH4 Amel_4.0_GroupUn genomic scaffold	CH877674	6151	49	0	0
	Apis mellifera strain DH4 Amel_4.0_GroupUn genomic scaffold	CH877675	36334	1280	9	45
	Apis mellifera strain DH4 Amel_4.0_GroupUn genomic scaffold	CH877676	3403	103	0	0
	Apis mellifera strain DH4 Amel_4.0_GroupUn genomic scaffold	CH877677	6942	70	0	0
	Apis mellifera strain DH4 Amel_4.0_GroupUn genomic scaffold	CH877678	11488	386	0	0
	Apis mellifera strain DH4 Amel_4.0_GroupUn genomic scaffold	CH877679	4689	159	0	0
	Apis mellifera strain DH4 Amel_4.0_GroupUn genomic scaffold	CH877680	11927	404	0	0
	Apis mellifera strain DH4 Amel_4.0_GroupUn genomic scaffold	CH877681	3785	68	0	0
	Apis mellifera strain DH4 Amel_4.0_GroupUn genomic scaffold	CH877682	39832	1326	2	8
	Apis mellifera strain DH4 Amel_4.0_GroupUn genomic scaffold	CH877683	4556	142	0	0
	Apis mellifera strain DH4 Amel_4.0_GroupUn genomic scaffold	CH877684	13131	35	0	0
	Apis mellifera strain DH4 Amel_4.0_GroupUn genomic scaffold	CH877685	7309	221	0	0
	Apis mellifera strain DH4 Amel_4.0_GroupUn genomic scaffold	CH877686	10430	328	0	0
	Apis mellifera strain DH4 Amel_4.0_GroupUn genomic scaffold	CH877687	3366	111	0	0
	Apis mellifera strain DH4 Amel_4.0_GroupUn genomic scaffold	CH877688	9106	80	1	4
	Apis mellifera strain DH4 Amel_4.0_GroupUn genomic scaffold	CH877689	9849	351	0	0
	Apis mellifera strain DH4 Amel_4.0_GroupUn genomic scaffold	CH877690	16527	576	2	4
	Apis mellifera strain DH4 Amel_4.0_GroupUn genomic scaffold	CH877691	7030	200	0	0
	Apis mellifera strain DH4 Amel_4.0_GroupUn genomic scaffold	CH877692	4203	55	0	0
	Apis mellifera strain DH4 Amel_4.0_GroupUn genomic scaffold	CH877693	8782	308	0	0
	Apis mellifera strain DH4 Amel_4.0_GroupUn genomic scaffold	CH877694	3137	95	0	0
	Apis mellifera strain DH4 Amel_4.0_GroupUn genomic scaffold	CH877695	5331	28	0	0
	Apis mellifera strain DH4 Amel_4.0_GroupUn genomic scaffold	CH877696	6272	175	0	0
	Apis mellifera strain DH4 Amel_4.0_GroupUn genomic scaffold	CH877697	3888	112	0	0
	Apis mellifera strain DH4 Amel_4.0_GroupUn genomic scaffold	CH877698	34217	1170	3	21
	Apis mellifera strain DH4 Amel_4.0_GroupUn genomic scaffold	CH877699	15006	497	2	22
	Apis mellifera strain DH4 Amel_4.0_GroupUn genomic scaffold	CH877700	5266	166	2	14
	Apis mellifera strain DH4 Amel_4.0_GroupUn genomic scaffold	CH877701	3449	104	1	2
	Apis mellifera strain DH4 Amel_4.0_GroupUn genomic scaffold	CH877702	15548	536	1	6
	Apis mellifera strain DH4 Amel_4.0_GroupUn genomic scaffold	CH877703	11647	409	1	2
	Apis mellifera strain DH4 Amel_4.0_GroupUn genomic scaffold	CH877704	52282	256	0	0
	Apis mellifera strain DH4 Amel_4.0_GroupUn genomic scaffold	CH877705	7717	210	2	5
	Apis mellifera strain DH4 Amel_4.0_GroupUn genomic scaffold	CH877706	14289	475	2	6
	Apis mellifera strain DH4 Amel_4.0_GroupUn genomic scaffold	CH877707	4315	137	0	0
	Apis mellifera strain DH4 Amel_4.0_GroupUn genomic scaffold	CH877708	11770	376	1	4
	Apis mellifera strain DH4 Amel_4.0_GroupUn genomic scaffold	CH877709	4318	138	0	0
	Apis mellifera strain DH4 Amel_4.0_GroupUn genomic scaffold	CH877710	7874	282	0	0
	Apis mellifera strain DH4 Amel_4.0_GroupUn genomic scaffold	CH877711	31052	934	1	5
	Apis mellifera strain DH4 Amel_4.0_GroupUn genomic scaffold	CH877712	51300	1743	15	81
	Apis mellifera strain DH4 Amel_4.0_GroupUn genomic scaffold	CH877713	29521	1034	0	0
	Apis mellifera strain DH4 Amel_4.0_GroupUn genomic scaffold	CH877714	4273	149	0	0
	Apis mellifera strain DH4 Amel_4.0_GroupUn genomic scaffold	CH877715	3388	89	0	0
	Apis mellifera strain DH4 Amel_4.0_GroupUn genomic scaffold	CH877716	13618	465	0	0
	Apis mellifera strain DH4 Amel_4.0_GroupUn genomic scaffold	CH877717	9214	304	0	0
	Apis mellifera strain DH4 Amel_4.0_GroupUn genomic scaffold	CH877718	11250	363	1	3
	Apis mellifera strain DH4 Amel_4.0_GroupUn genomic scaffold	CH877719	16963	124	0	0
	Apis mellifera strain DH4 Amel_4.0_GroupUn genomic scaffold	CH877720	5640	189	0	0
	Apis mellifera strain DH4 Amel_4.0_GroupUn genomic scaffold	CH877721	6347	224	0	0
	Apis mellifera strain DH4 Amel_4.0_GroupUn genomic scaffold	CH877722	5807	24	0	0
	Apis mellifera strain DH4 Amel_4.0_GroupUn genomic scaffold	CH877723	7865	196	0	0
	Apis mellifera strain DH4 Amel_4.0_GroupUn genomic scaffold	CH877724	3039	97	1	1
	Apis mellifera strain DH4 Amel_4.0_GroupUn genomic scaffold	CH877725	10279	316	0	0
	Apis mellifera strain DH4 Amel_4.0_GroupUn genomic scaffold	CH877726	15811	401	0	0
	Apis mellifera strain DH4 Amel_4.0_GroupUn genomic scaffold	CH877727	29047	1068	7	67
	Apis mellifera strain DH4 Amel_4.0_GroupUn genomic scaffold	CH877728	18643	687	1	6
	Apis mellifera strain DH4 Amel_4.0_GroupUn genomic scaffold	CH877729	36980	66	0	0
	Apis mellifera strain DH4 Amel_4.0_GroupUn genomic scaffold	CH877730	7596	269	0	0
	Apis mellifera strain DH4 Amel_4.0_GroupUn genomic scaffold	CH877731	9762	314	0	0
	Apis mellifera strain DH4 Amel_4.0_GroupUn genomic scaffold	CH877732	16017	88	0	0
	Apis mellifera strain DH4 Amel_4.0_GroupUn genomic scaffold	CH877733	3609	102	0	0
	Apis mellifera strain DH4 Amel_4.0_GroupUn genomic scaffold	CH877734	5589	157	0	0
	Apis mellifera strain DH4 Amel_4.0_GroupUn genomic scaffold	CH877735	25377	814	1	5
	Apis mellifera strain DH4 Amel_4.0_GroupUn genomic scaffold	CH877736	3696	127	0	0
	Apis mellifera strain DH4 Amel_4.0_GroupUn genomic scaffold	CH877737	7302	246	0	0
	Apis mellifera strain DH4 Amel_4.0_GroupUn genomic scaffold	CH877738	7006	65	0	0
	Apis mellifera strain DH4 Amel_4.0_GroupUn genomic scaffold	CH877739	8162	260	0	0
	Apis mellifera strain DH4 Amel_4.0_GroupUn genomic scaffold	CH877740	9451	305	3	12
	Apis mellifera strain DH4 Amel_4.0_GroupUn genomic scaffold	CH877741	7883	266	0	0
	Apis mellifera strain DH4 Amel_4.0_GroupUn genomic scaffold	CH877742	6731	218	0	0
	Apis mellifera strain DH4 Amel_4.0_GroupUn genomic scaffold	CH877743	10687	363	1	9
	Apis mellifera strain DH4 Amel_4.0_GroupUn genomic scaffold	CH877744	6655	30	0	0
	Apis mellifera strain DH4 Amel_4.0_GroupUn genomic scaffold	CH877745	10828	360	0	0
	Apis mellifera strain DH4 Amel_4.0_GroupUn genomic scaffold	CH877746	2969	61	0	0
	Apis mellifera strain DH4 Amel_4.0_GroupUn genomic scaffold	CH877747	16253	310	0	0
	Apis mellifera strain DH4 Amel_4.0_GroupUn genomic scaffold	CH877748	11759	393	0	0
	Apis mellifera strain DH4 Amel_4.0_GroupUn genomic scaffold	CH877749	12000	407	2	13
	Apis mellifera strain DH4 Amel_4.0_GroupUn genomic scaffold	CH877750	9303	237	0	0
	Apis mellifera strain DH4 Amel_4.0_GroupUn genomic scaffold	CH877751	3621	42	0	0
	Apis mellifera strain DH4 Amel_4.0_GroupUn genomic scaffold	CH877752	8443	229	1	2
	Apis mellifera strain DH4 Amel_4.0_GroupUn genomic scaffold	CH877753	4119	2	0	0
	Apis mellifera strain DH4 Amel_4.0_GroupUn genomic scaffold	CH877754	5464	171	1	4
	Apis mellifera strain DH4 Amel_4.0_GroupUn genomic scaffold	CH877755	10387	361	3	13
	Apis mellifera strain DH4 Amel_4.0_GroupUn genomic scaffold	CH877756	2194	72	0	0
	Apis mellifera strain DH4 Amel_4.0_GroupUn genomic scaffold	CH877757	10307	96	0	0
	Apis mellifera strain DH4 Amel_4.0_GroupUn genomic scaffold	CH877758	8493	244	0	0
	Apis mellifera strain DH4 Amel_4.0_GroupUn genomic scaffold	CH877759	21289	502	0	0
	Apis mellifera strain DH4 Amel_4.0_GroupUn genomic scaffold	CH877760	9948	317	2	20
	Apis mellifera strain DH4 Amel_4.0_GroupUn genomic scaffold	CH877761	8117	232	0	0
	Apis mellifera strain DH4 Amel_4.0_GroupUn genomic scaffold	CH877762	5076	173	0	0
	Apis mellifera strain DH4 Amel_4.0_GroupUn genomic scaffold	CH877763	13571	151	0	0
	Apis mellifera strain DH4 Amel_4.0_GroupUn genomic scaffold	CH877764	26714	927	5	35
	Apis mellifera strain DH4 Amel_4.0_GroupUn genomic scaffold	CH877765	15596	530	1	7
	Apis mellifera strain DH4 Amel_4.0_GroupUn genomic scaffold	CH877766	12232	393	0	0
	Apis mellifera strain DH4 Amel_4.0_GroupUn genomic scaffold	CH877767	6168	213	0	0
	Apis mellifera strain DH4 Amel_4.0_GroupUn genomic scaffold	CH877768	11270	365	0	0
	Apis mellifera strain DH4 Amel_4.0_GroupUn genomic scaffold	CH877769	6136	1	0	0
	Apis mellifera strain DH4 Amel_4.0_GroupUn genomic scaffold	CH877770	16764	549	0	0
	Apis mellifera strain DH4 Amel_4.0_GroupUn genomic scaffold	CH877771	5954	212	0	0
	Apis mellifera strain DH4 Amel_4.0_GroupUn genomic scaffold	CH877772	38431	1284	8	54
	Apis mellifera strain DH4 Amel_4.0_GroupUn genomic scaffold	CH877773	3037	30	0	0
	Apis mellifera strain DH4 Amel_4.0_GroupUn genomic scaffold	CH877774	43462	1485	1	2
	Apis mellifera strain DH4 Amel_4.0_GroupUn genomic scaffold	CH877775	10791	395	1	3
	Apis mellifera strain DH4 Amel_4.0_GroupUn genomic scaffold	CH877777	7598	252	1	6
	Apis mellifera strain DH4 Amel_4.0_GroupUn genomic scaffold	CH877778	11520	406	2	6
	Apis mellifera strain DH4 Amel_4.0_GroupUn genomic scaffold	CH877779	10906	74	0	0
	Apis mellifera strain DH4 Amel_4.0_GroupUn genomic scaffold	CH877780	35601	1286	8	45
	Apis mellifera strain DH4 Amel_4.0_GroupUn genomic scaffold	CH877781	33733	1122	1	4
	Apis mellifera strain DH4 Amel_4.0_GroupUn genomic scaffold	CH877782	8784	266	0	0
	Apis mellifera strain DH4 Amel_4.0_GroupUn genomic scaffold	CH877783	5758	175	0	0
	Apis mellifera strain DH4 Amel_4.0_GroupUn genomic scaffold	CH877784	22434	436	1	9
	Apis mellifera strain DH4 Amel_4.0_GroupUn genomic scaffold	CH877785	4311	97	0	0
	Apis mellifera strain DH4 Amel_4.0_GroupUn genomic scaffold	CH877786	16249	540	2	26
	Apis mellifera strain DH4 Amel_4.0_GroupUn genomic scaffold	CH877787	13211	420	1	7
	Apis mellifera strain DH4 Amel_4.0_GroupUn genomic scaffold	CH877788	11072	358	0	0
	Apis mellifera strain DH4 Amel_4.0_GroupUn genomic scaffold	CH877789	7049	200	0	0
	Apis mellifera strain DH4 Amel_4.0_GroupUn genomic scaffold	CH877790	39034	1441	1	4
	Apis mellifera strain DH4 Amel_4.0_GroupUn genomic scaffold	CH877791	19079	641	1	13
	Apis mellifera strain DH4 Amel_4.0_GroupUn genomic scaffold	CH877792	16627	109	1	1
	Apis mellifera strain DH4 Amel_4.0_GroupUn genomic scaffold	CH877793	7590	249	1	9
	Apis mellifera strain DH4 Amel_4.0_GroupUn genomic scaffold	CH877794	3373	33	0	0
	Apis mellifera strain DH4 Amel_4.0_GroupUn genomic scaffold	CH877795	3007	77	0	0
	Apis mellifera strain DH4 Amel_4.0_GroupUn genomic scaffold	CH877796	20569	679	0	0
	Apis mellifera strain DH4 Amel_4.0_GroupUn genomic scaffold	CH877797	6946	223	0	0
	Apis mellifera strain DH4 Amel_4.0_GroupUn genomic scaffold	CH877798	9768	309	0	0
	Apis mellifera strain DH4 Amel_4.0_GroupUn genomic scaffold	CH877799	5026	168	0	0
	Apis mellifera strain DH4 Amel_4.0_GroupUn genomic scaffold	CH877800	20602	443	0	0
	Apis mellifera strain DH4 Amel_4.0_GroupUn genomic scaffold	CH877801	9086	310	0	0
	Apis mellifera strain DH4 Amel_4.0_GroupUn genomic scaffold	CH877802	10359	327	6	28
	Apis mellifera strain DH4 Amel_4.0_GroupUn genomic scaffold	CH877803	6386	162	0	0
	Apis mellifera strain DH4 Amel_4.0_GroupUn genomic scaffold	CH877804	7853	249	0	0
	Apis mellifera strain DH4 Amel_4.0_GroupUn genomic scaffold	CH877805	3512	117	0	0
	Apis mellifera strain DH4 Amel_4.0_GroupUn genomic scaffold	CH877806	17138	549	3	14
	Apis mellifera strain DH4 Amel_4.0_GroupUn genomic scaffold	CH877807	10164	198	0	0
	Apis mellifera strain DH4 Amel_4.0_GroupUn genomic scaffold	CH877808	10576	350	0	0
	Apis mellifera strain DH4 Amel_4.0_GroupUn genomic scaffold	CH877809	5292	157	0	0
	Apis mellifera strain DH4 Amel_4.0_GroupUn genomic scaffold	CH877810	12953	449	0	0
	Apis mellifera strain DH4 Amel_4.0_GroupUn genomic scaffold	CH877811	7169	203	0	0
	Apis mellifera strain DH4 Amel_4.0_GroupUn genomic scaffold	CH877812	39226	1360	0	0
	Apis mellifera strain DH4 Amel_4.0_GroupUn genomic scaffold	CH877813	4817	4	0	0
	Apis mellifera strain DH4 Amel_4.0_GroupUn genomic scaffold	CH877814	15159	330	0	0
	Apis mellifera strain DH4 Amel_4.0_GroupUn genomic scaffold	CH877815	5011	155	0	0
	Apis mellifera strain DH4 Amel_4.0_GroupUn genomic scaffold	CH877816	10169	307	0	0
	Apis mellifera strain DH4 Amel_4.0_GroupUn genomic scaffold	CH877817	2610	20	0	0
	Apis mellifera strain DH4 Amel_4.0_GroupUn genomic scaffold	CH877818	4309	151	0	0
	Apis mellifera strain DH4 Amel_4.0_GroupUn genomic scaffold	CH877819	6108	49	0	0
	Apis mellifera strain DH4 Amel_4.0_GroupUn genomic scaffold	CH877820	5399	189	0	0
	Apis mellifera strain DH4 Amel_4.0_GroupUn genomic scaffold	CH877821	3738	54	1	2
	Apis mellifera strain DH4 Amel_4.0_GroupUn genomic scaffold	CH877822	21945	765	0	0
	Apis mellifera strain DH4 Amel_4.0_GroupUn genomic scaffold	CH877823	14134	286	2	10
	Apis mellifera strain DH4 Amel_4.0_GroupUn genomic scaffold	CH877824	7942	259	1	1
	Apis mellifera strain DH4 Amel_4.0_GroupUn genomic scaffold	CH877825	13684	434	0	0
	Apis mellifera strain DH4 Amel_4.0_GroupUn genomic scaffold	CH877826	6160	180	0	0
	Apis mellifera strain DH4 Amel_4.0_GroupUn genomic scaffold	CH877827	3787	13	0	0
	Apis mellifera strain DH4 Amel_4.0_GroupUn genomic scaffold	CH877828	6162	202	1	12
	Apis mellifera strain DH4 Amel_4.0_GroupUn genomic scaffold	CH877829	6407	217	1	2
	Apis mellifera strain DH4 Amel_4.0_GroupUn genomic scaffold	CH877830	12533	421	0	0
	Apis mellifera strain DH4 Amel_4.0_GroupUn genomic scaffold	CH877831	14247	444	0	0
	Apis mellifera strain DH4 Amel_4.0_GroupUn genomic scaffold	CH877832	16747	563	1	27
	Apis mellifera strain DH4 Amel_4.0_GroupUn genomic scaffold	CH877833	4475	71	0	0
	Apis mellifera strain DH4 Amel_4.0_GroupUn genomic scaffold	CH877834	4203	109	0	0
	Apis mellifera strain DH4 Amel_4.0_GroupUn genomic scaffold	CH877835	13135	436	0	0
	Apis mellifera strain DH4 Amel_4.0_GroupUn genomic scaffold	CH877836	7046	187	0	0
	Apis mellifera strain DH4 Amel_4.0_GroupUn genomic scaffold	CH877837	26003	195	0	0
	Apis mellifera strain DH4 Amel_4.0_GroupUn genomic scaffold	CH877838	5548	134	0	0
	Apis mellifera strain DH4 Amel_4.0_GroupUn genomic scaffold	CH877839	4054	109	0	0
	Apis mellifera strain DH4 Amel_4.0_GroupUn genomic scaffold	CH877840	7115	214	0	0
	Apis mellifera strain DH4 Amel_4.0_GroupUn genomic scaffold	CH877841	10421	364	0	0
	Apis mellifera strain DH4 Amel_4.0_GroupUn genomic scaffold	CH877842	12835	385	3	16
	Apis mellifera strain DH4 Amel_4.0_GroupUn genomic scaffold	CH877843	16208	545	0	0
	Apis mellifera strain DH4 Amel_4.0_GroupUn genomic scaffold	CH877844	7372	237	1	10
	Apis mellifera strain DH4 Amel_4.0_GroupUn genomic scaffold	CH877845	8149	279	2	8
	Apis mellifera strain DH4 Amel_4.0_GroupUn genomic scaffold	CH877846	8455	248	1	5
	Apis mellifera strain DH4 Amel_4.0_GroupUn genomic scaffold	CH877847	22097	745	0	0
	Apis mellifera strain DH4 Amel_4.0_GroupUn genomic scaffold	CH877848	9395	315	0	0
	Apis mellifera strain DH4 Amel_4.0_GroupUn genomic scaffold	CH877849	5132	170	2	14
	Apis mellifera strain DH4 Amel_4.0_GroupUn genomic scaffold	CH877850	3748	124	0	0
	Apis mellifera strain DH4 Amel_4.0_GroupUn genomic scaffold	CH877851	15255	523	0	0
	Apis mellifera strain DH4 Amel_4.0_GroupUn genomic scaffold	CH877852	8590	305	2	18
	Apis mellifera strain DH4 Amel_4.0_GroupUn genomic scaffold	CH877853	7758	220	0	0
	Apis mellifera strain DH4 Amel_4.0_GroupUn genomic scaffold	CH877854	10186	362	0	0
	Apis mellifera strain DH4 Amel_4.0_GroupUn genomic scaffold	CH877855	35241	1301	1	1
	Apis mellifera strain DH4 Amel_4.0_GroupUn genomic scaffold	CH877856	9841	309	3	13
	Apis mellifera strain DH4 Amel_4.0_GroupUn genomic scaffold	CH877857	3607	96	0	0
	Apis mellifera strain DH4 Amel_4.0_GroupUn genomic scaffold	CH877858	10316	324	0	0
	Apis mellifera strain DH4 Amel_4.0_GroupUn genomic scaffold	CH877859	3900	130	0	0
	Apis mellifera strain DH4 Amel_4.0_GroupUn genomic scaffold	CH877860	5492	91	0	0
	Apis mellifera strain DH4 Amel_4.0_GroupUn genomic scaffold	CH877861	7098	247	2	4
	Apis mellifera strain DH4 Amel_4.0_GroupUn genomic scaffold	CH877862	2234	22	0	0
	Apis mellifera strain DH4 Amel_4.0_GroupUn genomic scaffold	CH877863	3401	100	0	0
	Apis mellifera strain DH4 Amel_4.0_GroupUn genomic scaffold	CH877864	7971	41	0	0
	Apis mellifera strain DH4 Amel_4.0_GroupUn genomic scaffold	CH877865	10801	350	0	0
	Apis mellifera strain DH4 Amel_4.0_GroupUn genomic scaffold	CH877866	3285	88	0	0
	Apis mellifera strain DH4 Amel_4.0_GroupUn genomic scaffold	CH877867	3162	71	0	0
	Apis mellifera strain DH4 Amel_4.0_GroupUn genomic scaffold	CH877868	6070	207	0	0
	Apis mellifera strain DH4 Amel_4.0_GroupUn genomic scaffold	CH877869	6910	210	1	8
	Apis mellifera strain DH4 Amel_4.0_GroupUn genomic scaffold	CH877870	10369	332	0	0
	Apis mellifera strain DH4 Amel_4.0_GroupUn genomic scaffold	CH877871	11034	318	1	1
	Apis mellifera strain DH4 Amel_4.0_GroupUn genomic scaffold	CH877872	5958	212	0	0
	Apis mellifera strain DH4 Amel_4.0_GroupUn genomic scaffold	CH877873	19937	656	5	29
	Apis mellifera strain DH4 Amel_4.0_GroupUn genomic scaffold	CH877874	3353	56	0	0
	Apis mellifera strain DH4 Amel_4.0_GroupUn genomic scaffold	CH877875	3475	98	0	0
	Apis mellifera strain DH4 Amel_4.0_GroupUn genomic scaffold	CH877876	9109	312	0	0
	Apis mellifera strain DH4 Amel_4.0_GroupUn genomic scaffold	CH877877	4276	60	0	0
	Apis mellifera strain DH4 Amel_4.0_GroupUn genomic scaffold	CH877878	5996	134	0	0
	Apis mellifera strain DH4 Amel_4.0_GroupUn genomic scaffold	CH877879	17780	611	0	0
	Apis mellifera strain DH4 Amel_4.0_GroupUn genomic scaffold	CH877880	51933	1742	9	67
	Apis mellifera strain DH4 Amel_4.0_GroupUn genomic scaffold	CH877881	6560	211	0	0
	Apis mellifera strain DH4 Amel_4.0_GroupUn genomic scaffold	CH877882	13121	411	0	0
	Apis mellifera strain DH4 Amel_4.0_GroupUn genomic scaffold	CH877883	5917	71	0	0
	Apis mellifera strain DH4 Amel_4.0_GroupUn genomic scaffold	CH877884	3368	103	0	0
	Apis mellifera strain DH4 Amel_4.0_GroupUn genomic scaffold	CH877885	29084	1012	4	29
	Apis mellifera strain DH4 Amel_4.0_GroupUn genomic scaffold	CH877886	42698	1116	1	1
	Apis mellifera strain DH4 Amel_4.0_GroupUn genomic scaffold	CH877887	11352	382	0	0
	Apis mellifera strain DH4 Amel_4.0_GroupUn genomic scaffold	CH877888	32062	1087	2	2
	Apis mellifera strain DH4 Amel_4.0_GroupUn genomic scaffold	CH877889	19131	681	6	36
	Apis mellifera strain DH4 Amel_4.0_GroupUn genomic scaffold	CH877890	5730	176	1	3
	Apis mellifera strain DH4 Amel_4.0_GroupUn genomic scaffold	CH877891	2739	87	0	0
	Apis mellifera strain DH4 Amel_4.0_GroupUn genomic scaffold	CH877892	3935	88	0	0
	Apis mellifera strain DH4 Amel_4.0_GroupUn genomic scaffold	CH877893	5681	169	0	0
	Apis mellifera strain DH4 Amel_4.0_GroupUn genomic scaffold	CH877894	33811	420	0	0
	Apis mellifera strain DH4 Amel_4.0_GroupUn genomic scaffold	CH877895	4474	121	0	0
	Apis mellifera strain DH4 Amel_4.0_GroupUn genomic scaffold	CH877896	5016	141	0	0
	Apis mellifera strain DH4 Amel_4.0_GroupUn genomic scaffold	CH877897	4832	164	0	0
	Apis mellifera strain DH4 Amel_4.0_GroupUn genomic scaffold	CH877898	17773	533	0	0
	Apis mellifera strain DH4 Amel_4.0_GroupUn genomic scaffold	CH877899	10315	334	0	0
	Apis mellifera strain DH4 Amel_4.0_GroupUn genomic scaffold	CH877900	8370	289	1	1
	Apis mellifera strain DH4 Amel_4.0_GroupUn genomic scaffold	CH877901	13960	254	0	0
	Apis mellifera strain DH4 Amel_4.0_GroupUn genomic scaffold	CH877902	19809	696	0	0
	Apis mellifera strain DH4 Amel_4.0_GroupUn genomic scaffold	CH877903	5228	171	0	0
	Apis mellifera strain DH4 Amel_4.0_GroupUn genomic scaffold	CH877904	11642	90	0	0
	Apis mellifera strain DH4 Amel_4.0_GroupUn genomic scaffold	CH877905	19132	650	3	14
	Apis mellifera strain DH4 Amel_4.0_GroupUn genomic scaffold	CH877906	23124	706	2	24
	Apis mellifera strain DH4 Amel_4.0_GroupUn genomic scaffold	CH877907	15869	534	0	0
	Apis mellifera strain DH4 Amel_4.0_GroupUn genomic scaffold	CH877908	3958	120	0	0
	Apis mellifera strain DH4 Amel_4.0_GroupUn genomic scaffold	CH877909	5496	42	0	0
	Apis mellifera strain DH4 Amel_4.0_GroupUn genomic scaffold	CH877910	5413	26	0	0
	Apis mellifera strain DH4 Amel_4.0_GroupUn genomic scaffold	CH877911	6239	164	0	0
	Apis mellifera strain DH4 Amel_4.0_GroupUn genomic scaffold	CH877912	3922	39	0	0
	Apis mellifera strain DH4 Amel_4.0_GroupUn genomic scaffold	CH877913	18478	684	2	10
	Apis mellifera strain DH4 Amel_4.0_GroupUn genomic scaffold	CH877914	6744	196	0	0
	Apis mellifera strain DH4 Amel_4.0_GroupUn genomic scaffold	CH877915	3722	118	0	0
	Apis mellifera strain DH4 Amel_4.0_GroupUn genomic scaffold	CH877916	14541	229	0	0
	Apis mellifera strain DH4 Amel_4.0_GroupUn genomic scaffold	CH877917	5534	58	0	0
	Apis mellifera strain DH4 Amel_4.0_GroupUn genomic scaffold	CH877918	36301	1303	2	22
	Apis mellifera strain DH4 Amel_4.0_GroupUn genomic scaffold	CH877919	26426	989	1	17
	Apis mellifera strain DH4 Amel_4.0_GroupUn genomic scaffold	CH877920	8878	301	1	4
	Apis mellifera strain DH4 Amel_4.0_GroupUn genomic scaffold	CH877921	10469	73	0	0
	Apis mellifera strain DH4 Amel_4.0_GroupUn genomic scaffold	CH877922	29604	1009	0	0
	Apis mellifera strain DH4 Amel_4.0_GroupUn genomic scaffold	CH877923	6550	229	1	5
	Apis mellifera strain DH4 Amel_4.0_GroupUn genomic scaffold	CH877924	13923	469	2	19
	Apis mellifera strain DH4 Amel_4.0_GroupUn genomic scaffold	CH877925	23379	847	6	34
	Apis mellifera strain DH4 Amel_4.0_GroupUn genomic scaffold	CH877926	6255	217	0	0
	Apis mellifera strain DH4 Amel_4.0_GroupUn genomic scaffold	CH877927	16854	549	1	4
	Apis mellifera strain DH4 Amel_4.0_GroupUn genomic scaffold	CH877928	8242	25	0	0
	Apis mellifera strain DH4 Amel_4.0_GroupUn genomic scaffold	CH877929	37842	1238	0	0
	Apis mellifera strain DH4 Amel_4.0_GroupUn genomic scaffold	CH877930	4759	87	0	0
	Apis mellifera strain DH4 Amel_4.0_GroupUn genomic scaffold	CH877931	11749	406	2	9
	Apis mellifera strain DH4 Amel_4.0_GroupUn genomic scaffold	CH877932	4691	101	0	0
	Apis mellifera strain DH4 Amel_4.0_GroupUn genomic scaffold	CH877933	7562	41	0	0
	Apis mellifera strain DH4 Amel_4.0_GroupUn genomic scaffold	CH877934	13310	39	0	0
	Apis mellifera strain DH4 Amel_4.0_GroupUn genomic scaffold	CH877935	7326	63	0	0
	Apis mellifera strain DH4 Amel_4.0_GroupUn genomic scaffold	CH877936	10974	358	1	9
	Apis mellifera strain DH4 Amel_4.0_GroupUn genomic scaffold	CH877937	17620	620	2	17
	Apis mellifera strain DH4 Amel_4.0_GroupUn genomic scaffold	CH877938	5305	163	0	0
	Apis mellifera strain DH4 Amel_4.0_GroupUn genomic scaffold	CH877939	3720	123	0	0
	Apis mellifera strain DH4 Amel_4.0_GroupUn genomic scaffold	CH877940	11672	60	0	0
	Apis mellifera strain DH4 Amel_4.0_GroupUn genomic scaffold	CH877941	7988	218	0	0
	Apis mellifera strain DH4 Amel_4.0_GroupUn genomic scaffold	CH877942	28128	410	0	0
	Apis mellifera strain DH4 Amel_4.0_GroupUn genomic scaffold	CH877943	2873	93	0	0
	Apis mellifera strain DH4 Amel_4.0_GroupUn genomic scaffold	CH877944	10255	347	1	3
	Apis mellifera strain DH4 Amel_4.0_GroupUn genomic scaffold	CH877945	9030	78	0	0
	Apis mellifera strain DH4 Amel_4.0_GroupUn genomic scaffold	CH877946	10653	351	2	6
	Apis mellifera strain DH4 Amel_4.0_GroupUn genomic scaffold	CH877947	10943	390	0	0
	Apis mellifera strain DH4 Amel_4.0_GroupUn genomic scaffold	CH877948	15939	531	0	0
	Apis mellifera strain DH4 Amel_4.0_GroupUn genomic scaffold	CH877949	36128	1295	4	34
	Apis mellifera strain DH4 Amel_4.0_GroupUn genomic scaffold	CH877950	8742	307	0	0
	Apis mellifera strain DH4 Amel_4.0_GroupUn genomic scaffold	CH877951	4862	158	0	0
	Apis mellifera strain DH4 Amel_4.0_GroupUn genomic scaffold	CH877952	5419	183	0	0
	Apis mellifera strain DH4 Amel_4.0_GroupUn genomic scaffold	CH877953	4623	143	0	0
	Apis mellifera strain DH4 Amel_4.0_GroupUn genomic scaffold	CH877954	38187	175	0	0
	Apis mellifera strain DH4 Amel_4.0_GroupUn genomic scaffold	CH877955	29104	932	0	0
	Apis mellifera strain DH4 Amel_4.0_GroupUn genomic scaffold	CH877956	11892	68	0	0
	Apis mellifera strain DH4 Amel_4.0_GroupUn genomic scaffold	CH877957	3966	127	1	5
	Apis mellifera strain DH4 Amel_4.0_GroupUn genomic scaffold	CH877958	8482	305	0	0
	Apis mellifera strain DH4 Amel_4.0_GroupUn genomic scaffold	CH877959	36129	810	4	31
	Apis mellifera strain DH4 Amel_4.0_GroupUn genomic scaffold	CH877960	7120	232	0	0
	Apis mellifera strain DH4 Amel_4.0_GroupUn genomic scaffold	CH877961	5027	10	0	0
	Apis mellifera strain DH4 Amel_4.0_GroupUn genomic scaffold	CH877962	14753	379	0	0
	Apis mellifera strain DH4 Amel_4.0_GroupUn genomic scaffold	CH877963	9010	245	0	0
	Apis mellifera strain DH4 Amel_4.0_GroupUn genomic scaffold	CH877964	19397	697	6	36
	Apis mellifera strain DH4 Amel_4.0_GroupUn genomic scaffold	CH877965	9053	321	0	0
	Apis mellifera strain DH4 Amel_4.0_GroupUn genomic scaffold	CH877966	16300	562	0	0
	Apis mellifera strain DH4 Amel_4.0_GroupUn genomic scaffold	CH877967	5794	200	0	0
	Apis mellifera strain DH4 Amel_4.0_GroupUn genomic scaffold	CH877968	14272	466	0	0
	Apis mellifera strain DH4 Amel_4.0_GroupUn genomic scaffold	CH877969	3570	117	0	0
	Apis mellifera strain DH4 Amel_4.0_GroupUn genomic scaffold	CH877970	6996	232	0	0
	Apis mellifera strain DH4 Amel_4.0_GroupUn genomic scaffold	CH877971	8843	292	2	8
	Apis mellifera strain DH4 Amel_4.0_GroupUn genomic scaffold	CH877972	4783	127	0	0
	Apis mellifera strain DH4 Amel_4.0_GroupUn genomic scaffold	CH877973	14443	117	0	0
	Apis mellifera strain DH4 Amel_4.0_GroupUn genomic scaffold	CH877974	18506	602	1	2
	Apis mellifera strain DH4 Amel_4.0_GroupUn genomic scaffold	CH877975	63526	2297	9	72
	Apis mellifera strain DH4 Amel_4.0_GroupUn genomic scaffold	CH877976	29492	485	0	0
	Apis mellifera strain DH4 Amel_4.0_GroupUn genomic scaffold	CH877977	6229	162	0	0
	Apis mellifera strain DH4 Amel_4.0_GroupUn genomic scaffold	CH877978	20969	150	0	0
	Apis mellifera strain DH4 Amel_4.0_GroupUn genomic scaffold	CH877979	31346	1140	0	0
	Apis mellifera strain DH4 Amel_4.0_GroupUn genomic scaffold	CH877980	52733	1267	8	38
	Apis mellifera strain DH4 Amel_4.0_GroupUn genomic scaffold	CH877981	46258	1628	12	54
	Apis mellifera strain DH4 Amel_4.0_GroupUn genomic scaffold	CH877982	13220	337	0	0
	Apis mellifera strain DH4 Amel_4.0_GroupUn genomic scaffold	CH877983	12414	47	2	2
	Apis mellifera strain DH4 Amel_4.0_GroupUn genomic scaffold	CH877984	5979	217	0	0
	Apis mellifera strain DH4 Amel_4.0_GroupUn genomic scaffold	CH877985	6116	190	0	0
	Apis mellifera strain DH4 Amel_4.0_GroupUn genomic scaffold	CH877986	40807	52	0	0
	Apis mellifera strain DH4 Amel_4.0_GroupUn genomic scaffold	CH877987	4024	137	0	0
	Apis mellifera strain DH4 Amel_4.0_GroupUn genomic scaffold	CH877988	15202	535	0	0
	Apis mellifera strain DH4 Amel_4.0_GroupUn genomic scaffold	CH877989	4227	39	0	0
	Apis mellifera strain DH4 Amel_4.0_GroupUn genomic scaffold	CH877990	10777	361	3	12
	Apis mellifera strain DH4 Amel_4.0_GroupUn genomic scaffold	CH877991	2732	77	0	0
	Apis mellifera strain DH4 Amel_4.0_GroupUn genomic scaffold	CH877992	12454	389	1	3
	Apis mellifera strain DH4 Amel_4.0_GroupUn genomic scaffold	CH877993	4998	147	0	0
	Apis mellifera strain DH4 Amel_4.0_GroupUn genomic scaffold	CH877994	6188	2	0	0
	Apis mellifera strain DH4 Amel_4.0_GroupUn genomic scaffold	CH877995	5805	2	0	0
	Apis mellifera strain DH4 Amel_4.0_GroupUn genomic scaffold	CH877996	6153	189	0	0
	Apis mellifera strain DH4 Amel_4.0_GroupUn genomic scaffold	CH877997	4832	33	0	0
	Apis mellifera strain DH4 Amel_4.0_GroupUn genomic scaffold	CH877998	14319	456	1	2
	Apis mellifera strain DH4 Amel_4.0_GroupUn genomic scaffold	CH877999	5116	155	0	0
	Apis mellifera strain DH4 Amel_4.0_GroupUn genomic scaffold	CH878000	6041	36	0	0
	Apis mellifera strain DH4 Amel_4.0_GroupUn genomic scaffold	CH878001	18943	634	4	33
	Apis mellifera strain DH4 Amel_4.0_GroupUn genomic scaffold	CH878002	2317	38	0	0
	Apis mellifera strain DH4 Amel_4.0_GroupUn genomic scaffold	CH878003	3098	1	0	0
	Apis mellifera strain DH4 Amel_4.0_GroupUn genomic scaffold	CH878004	6228	192	0	0
	Apis mellifera strain DH4 Amel_4.0_GroupUn genomic scaffold	CH878005	4605	151	0	0
	Apis mellifera strain DH4 Amel_4.0_GroupUn genomic scaffold	CH878006	32157	851	16	85
	Apis mellifera strain DH4 Amel_4.0_GroupUn genomic scaffold	CH878007	5103	153	0	0
	Apis mellifera strain DH4 Amel_4.0_GroupUn genomic scaffold	CH878008	6383	213	0	0
	Apis mellifera strain DH4 Amel_4.0_GroupUn genomic scaffold	CH878009	5234	110	4	26
	Apis mellifera strain DH4 Amel_4.0_GroupUn genomic scaffold	CH878010	8348	218	0	0
	Apis mellifera strain DH4 Amel_4.0_GroupUn genomic scaffold	CH878011	13368	456	4	20
	Apis mellifera strain DH4 Amel_4.0_GroupUn genomic scaffold	CH878012	7818	251	1	4
	Apis mellifera strain DH4 Amel_4.0_GroupUn genomic scaffold	CH878013	9936	93	0	0
	Apis mellifera strain DH4 Amel_4.0_GroupUn genomic scaffold	CH878014	4895	143	0	0
	Apis mellifera strain DH4 Amel_4.0_GroupUn genomic scaffold	CH878015	62435	1609	0	0
	Apis mellifera strain DH4 Amel_4.0_GroupUn genomic scaffold	CH878016	4021	118	0	0
	Apis mellifera strain DH4 Amel_4.0_GroupUn genomic scaffold	CH878017	16588	532	0	0
	Apis mellifera strain DH4 Amel_4.0_GroupUn genomic scaffold	CH878018	13593	323	0	0
	Apis mellifera strain DH4 Amel_4.0_GroupUn genomic scaffold	CH878019	6838	205	0	0
	Apis mellifera strain DH4 Amel_4.0_GroupUn genomic scaffold	CH878020	9805	339	0	0
	Apis mellifera strain DH4 Amel_4.0_GroupUn genomic scaffold	CH878021	9338	320	1	10
	Apis mellifera strain DH4 Amel_4.0_GroupUn genomic scaffold	CH878022	8999	231	0	0
	Apis mellifera strain DH4 Amel_4.0_GroupUn genomic scaffold	CH878023	12084	406	2	13
	Apis mellifera strain DH4 Amel_4.0_GroupUn genomic scaffold	CH878024	20279	691	2	8
	Apis mellifera strain DH4 Amel_4.0_GroupUn genomic scaffold	CH878025	4573	134	2	5
	Apis mellifera strain DH4 Amel_4.0_GroupUn genomic scaffold	CH878026	15158	528	10	76
	Apis mellifera strain DH4 Amel_4.0_GroupUn genomic scaffold	CH878027	9670	319	0	0
	Apis mellifera strain DH4 Amel_4.0_GroupUn genomic scaffold	CH878028	31545	927	1	3
	Apis mellifera strain DH4 Amel_4.0_GroupUn genomic scaffold	CH878029	4340	63	0	0
	Apis mellifera strain DH4 Amel_4.0_GroupUn genomic scaffold	CH878030	17136	575	1	1
	Apis mellifera strain DH4 Amel_4.0_GroupUn genomic scaffold	CH878031	8490	237	1	4
	Apis mellifera strain DH4 Amel_4.0_GroupUn genomic scaffold	CH878032	12813	64	0	0
	Apis mellifera strain DH4 Amel_4.0_GroupUn genomic scaffold	CH878033	3154	97	0	0
	Apis mellifera strain DH4 Amel_4.0_GroupUn genomic scaffold	CH878034	24992	804	1	9
	Apis mellifera strain DH4 Amel_4.0_GroupUn genomic scaffold	CH878035	11456	362	1	15
	Apis mellifera strain DH4 Amel_4.0_GroupUn genomic scaffold	CH878036	4139	119	0	0
	Apis mellifera strain DH4 Amel_4.0_GroupUn genomic scaffold	CH878037	8530	234	2	18
	Apis mellifera strain DH4 Amel_4.0_GroupUn genomic scaffold	CH878038	4951	129	0	0
	Apis mellifera strain DH4 Amel_4.0_GroupUn genomic scaffold	CH878039	8939	298	0	0
	Apis mellifera strain DH4 Amel_4.0_GroupUn genomic scaffold	CH878040	18054	539	0	0
	Apis mellifera strain DH4 Amel_4.0_GroupUn genomic scaffold	CH878041	2714	85	0	0
	Apis mellifera strain DH4 Amel_4.0_GroupUn genomic scaffold	CH878042	6432	203	0	0
	Apis mellifera strain DH4 Amel_4.0_GroupUn genomic scaffold	CH878043	5059	12	0	0
	Apis mellifera strain DH4 Amel_4.0_GroupUn genomic scaffold	CH878044	10475	355	2	8
	Apis mellifera strain DH4 Amel_4.0_GroupUn genomic scaffold	CH878045	3707	35	0	0
	Apis mellifera strain DH4 Amel_4.0_GroupUn genomic scaffold	CH878046	5325	193	0	0
	Apis mellifera strain DH4 Amel_4.0_GroupUn genomic scaffold	CH878047	5796	36	0	0
	Apis mellifera strain DH4 Amel_4.0_GroupUn genomic scaffold	CH878048	24709	884	7	55
	Apis mellifera strain DH4 Amel_4.0_GroupUn genomic scaffold	CH878049	8171	246	2	13
	Apis mellifera strain DH4 Amel_4.0_GroupUn genomic scaffold	CH878050	25438	487	0	0
	Apis mellifera strain DH4 Amel_4.0_GroupUn genomic scaffold	CH878051	9218	319	1	6
	Apis mellifera strain DH4 Amel_4.0_GroupUn genomic scaffold	CH878052	6658	47	0	0
	Apis mellifera strain DH4 Amel_4.0_GroupUn genomic scaffold	CH878053	10463	311	0	0
	Apis mellifera strain DH4 Amel_4.0_GroupUn genomic scaffold	CH878054	7203	235	0	0
	Apis mellifera strain DH4 Amel_4.0_GroupUn genomic scaffold	CH878055	7743	249	0	0
	Apis mellifera strain DH4 Amel_4.0_GroupUn genomic scaffold	CH878056	11876	421	0	0
	Apis mellifera strain DH4 Amel_4.0_GroupUn genomic scaffold	CH878057	2115	79	0	0
	Apis mellifera strain DH4 Amel_4.0_GroupUn genomic scaffold	CH878058	21184	269	12	55
	Apis mellifera strain DH4 Amel_4.0_GroupUn genomic scaffold	CH878059	4223	19	0	0
	Apis mellifera strain DH4 Amel_4.0_GroupUn genomic scaffold	CH878060	16760	601	2	11
	Apis mellifera strain DH4 Amel_4.0_GroupUn genomic scaffold	CH878061	7208	207	0	0
	Apis mellifera strain DH4 Amel_4.0_GroupUn genomic scaffold	CH878062	13432	434	0	0
	Apis mellifera strain DH4 Amel_4.0_GroupUn genomic scaffold	CH878063	7615	72	0	0
	Apis mellifera strain DH4 Amel_4.0_GroupUn genomic scaffold	CH878064	7999	255	0	0
	Apis mellifera strain DH4 Amel_4.0_GroupUn genomic scaffold	CH878065	4425	115	0	0
	Apis mellifera strain DH4 Amel_4.0_GroupUn genomic scaffold	CH878066	10000	72	1	3
	Apis mellifera strain DH4 Amel_4.0_GroupUn genomic scaffold	CH878067	9693	10	0	0
	Apis mellifera strain DH4 Amel_4.0_GroupUn genomic scaffold	CH878068	2222	84	1	1
	Apis mellifera strain DH4 Amel_4.0_GroupUn genomic scaffold	CH878069	4849	163	0	0
	Apis mellifera strain DH4 Amel_4.0_GroupUn genomic scaffold	CH878070	5764	185	0	0
	Apis mellifera strain DH4 Amel_4.0_GroupUn genomic scaffold	CH878071	8864	284	1	4
	Apis mellifera strain DH4 Amel_4.0_GroupUn genomic scaffold	CH878072	4305	146	0	0
	Apis mellifera strain DH4 Amel_4.0_GroupUn genomic scaffold	CH878073	5755	181	1	4
	Apis mellifera strain DH4 Amel_4.0_GroupUn genomic scaffold	CH878074	36032	1277	1	7
	Apis mellifera strain DH4 Amel_4.0_GroupUn genomic scaffold	CH878075	26238	256	0	0
	Apis mellifera strain DH4 Amel_4.0_GroupUn genomic scaffold	CH878076	4549	143	0	0
	Apis mellifera strain DH4 Amel_4.0_GroupUn genomic scaffold	CH878077	6019	106	2	4
	Apis mellifera strain DH4 Amel_4.0_GroupUn genomic scaffold	CH878078	6283	3	0	0
	Apis mellifera strain DH4 Amel_4.0_GroupUn genomic scaffold	CH878079	18440	611	0	0
	Apis mellifera strain DH4 Amel_4.0_GroupUn genomic scaffold	CH878080	13234	461	1	3
	Apis mellifera strain DH4 Amel_4.0_GroupUn genomic scaffold	CH878081	4769	159	0	0
	Apis mellifera strain DH4 Amel_4.0_GroupUn genomic scaffold	CH878082	8308	268	0	0
	Apis mellifera strain DH4 Amel_4.0_GroupUn genomic scaffold	CH878083	4316	108	0	0
	Apis mellifera strain DH4 Amel_4.0_GroupUn genomic scaffold	CH878084	4251	152	0	0
	Apis mellifera strain DH4 Amel_4.0_GroupUn genomic scaffold	CH878085	23138	831	0	0
	Apis mellifera strain DH4 Amel_4.0_GroupUn genomic scaffold	CH878086	4426	146	0	0
	Apis mellifera strain DH4 Amel_4.0_GroupUn genomic scaffold	CH878087	9749	35	0	0
	Apis mellifera strain DH4 Amel_4.0_GroupUn genomic scaffold	CH878088	2905	64	0	0
	Apis mellifera strain DH4 Amel_4.0_GroupUn genomic scaffold	CH878089	2781	6	0	0
	Apis mellifera strain DH4 Amel_4.0_GroupUn genomic scaffold	CH878090	8289	256	0	0
	Apis mellifera strain DH4 Amel_4.0_GroupUn genomic scaffold	CH878091	3677	9	0	0
	Apis mellifera strain DH4 Amel_4.0_GroupUn genomic scaffold	CH878092	5886	206	0	0
	Apis mellifera strain DH4 Amel_4.0_GroupUn genomic scaffold	CH878093	21890	455	0	0
	Apis mellifera strain DH4 Amel_4.0_GroupUn genomic scaffold	CH878094	6878	88	0	0
	Apis mellifera strain DH4 Amel_4.0_GroupUn genomic scaffold	CH878095	14968	492	1	5
	Apis mellifera strain DH4 Amel_4.0_GroupUn genomic scaffold	CH878096	7118	218	2	4
	Apis mellifera strain DH4 Amel_4.0_GroupUn genomic scaffold	CH878097	2418	11	0	0
	Apis mellifera strain DH4 Amel_4.0_GroupUn genomic scaffold	CH878098	7894	290	0	0
	Apis mellifera strain DH4 Amel_4.0_GroupUn genomic scaffold	CH878099	6755	25	0	0
	Apis mellifera strain DH4 Amel_4.0_GroupUn genomic scaffold	CH878100	7665	76	0	0
	Apis mellifera strain DH4 Amel_4.0_GroupUn genomic scaffold	CH878101	15485	471	2	6
	Apis mellifera strain DH4 Amel_4.0_GroupUn genomic scaffold	CH878102	3201	96	0	0
	Apis mellifera strain DH4 Amel_4.0_GroupUn genomic scaffold	CH878103	8612	241	0	0
	Apis mellifera strain DH4 Amel_4.0_GroupUn genomic scaffold	CH878104	12663	63	0	0
	Apis mellifera strain DH4 Amel_4.0_GroupUn genomic scaffold	CH878105	11107	393	0	0
	Apis mellifera strain DH4 Amel_4.0_GroupUn genomic scaffold	CH878106	4513	75	0	0
	Apis mellifera strain DH4 Amel_4.0_GroupUn genomic scaffold	CH878107	10559	355	0	0
	Apis mellifera strain DH4 Amel_4.0_GroupUn genomic scaffold	CH878108	18978	646	3	25
	Apis mellifera strain DH4 Amel_4.0_GroupUn genomic scaffold	CH878109	11738	374	2	10
	Apis mellifera strain DH4 Amel_4.0_GroupUn genomic scaffold	CH878110	8063	265	0	0
	Apis mellifera strain DH4 Amel_4.0_GroupUn genomic scaffold	CH878111	37239	1027	6	53
	Apis mellifera strain DH4 Amel_4.0_GroupUn genomic scaffold	CH878112	2832	71	0	0
	Apis mellifera strain DH4 Amel_4.0_GroupUn genomic scaffold	CH878113	54752	1959	0	0
	Apis mellifera strain DH4 Amel_4.0_GroupUn genomic scaffold	CH878114	9315	318	1	3
	Apis mellifera strain DH4 Amel_4.0_GroupUn genomic scaffold	CH878115	10997	401	0	0
	Apis mellifera strain DH4 Amel_4.0_GroupUn genomic scaffold	CH878116	4592	119	0	0
	Apis mellifera strain DH4 Amel_4.0_GroupUn genomic scaffold	CH878117	17099	563	0	0
	Apis mellifera strain DH4 Amel_4.0_GroupUn genomic scaffold	CH878118	4998	149	0	0
	Apis mellifera strain DH4 Amel_4.0_GroupUn genomic scaffold	CH878119	7447	231	0	0
	Apis mellifera strain DH4 Amel_4.0_GroupUn genomic scaffold	CH878120	4568	125	0	0
	Apis mellifera strain DH4 Amel_4.0_GroupUn genomic scaffold	CH878121	8817	173	0	0
	Apis mellifera strain DH4 Amel_4.0_GroupUn genomic scaffold	CH878122	8752	301	0	0
	Apis mellifera strain DH4 Amel_4.0_GroupUn genomic scaffold	CH878123	19725	55	0	0
	Apis mellifera strain DH4 Amel_4.0_GroupUn genomic scaffold	CH878124	5836	115	0	0
	Apis mellifera strain DH4 Amel_4.0_GroupUn genomic scaffold	CH878125	4761	156	0	0
	Apis mellifera strain DH4 Amel_4.0_GroupUn genomic scaffold	CH878126	7780	23	2	2
	Apis mellifera strain DH4 Amel_4.0_GroupUn genomic scaffold	CH878127	6192	7	0	0
	Apis mellifera strain DH4 Amel_4.0_GroupUn genomic scaffold	CH878128	12032	172	0	0
	Apis mellifera strain DH4 Amel_4.0_GroupUn genomic scaffold	CH878129	15342	554	2	22
	Apis mellifera strain DH4 Amel_4.0_GroupUn genomic scaffold	CH878131	4857	114	0	0
	Apis mellifera strain DH4 Amel_4.0_GroupUn genomic scaffold	CH878132	29094	1022	5	74
	Apis mellifera strain DH4 Amel_4.0_GroupUn genomic scaffold	CH878133	8002	256	2	8
	Apis mellifera strain DH4 Amel_4.0_GroupUn genomic scaffold	CH878134	2821	67	0	0
	Apis mellifera strain DH4 Amel_4.0_GroupUn genomic scaffold	CH878135	7655	242	0	0
	Apis mellifera strain DH4 Amel_4.0_GroupUn genomic scaffold	CH878136	2371	73	0	0
	Apis mellifera strain DH4 Amel_4.0_GroupUn genomic scaffold	CH878137	9966	303	1	2
	Apis mellifera strain DH4 Amel_4.0_GroupUn genomic scaffold	CH878138	37426	1010	1	13
	Apis mellifera strain DH4 Amel_4.0_GroupUn genomic scaffold	CH878139	8862	288	4	13
	Apis mellifera strain DH4 Amel_4.0_GroupUn genomic scaffold	CH878140	6466	203	1	1
	Apis mellifera strain DH4 Amel_4.0_GroupUn genomic scaffold	CH878141	6528	9	0	0
	Apis mellifera strain DH4 Amel_4.0_GroupUn genomic scaffold	CH878142	6383	195	0	0
	Apis mellifera strain DH4 Amel_4.0_GroupUn genomic scaffold	CH878143	4750	168	2	10
	Apis mellifera strain DH4 Amel_4.0_GroupUn genomic scaffold	CH878144	15349	538	0	0
	Apis mellifera strain DH4 Amel_4.0_GroupUn genomic scaffold	CH878145	5707	34	0	0
	Apis mellifera strain DH4 Amel_4.0_GroupUn genomic scaffold	CH878146	5667	111	0	0
	Apis mellifera strain DH4 Amel_4.0_GroupUn genomic scaffold	CH878147	6219	58	0	0
	Apis mellifera strain DH4 Amel_4.0_GroupUn genomic scaffold	CH878148	3841	129	0	0
	Apis mellifera strain DH4 Amel_4.0_GroupUn genomic scaffold	CH878149	6187	151	0	0
	Apis mellifera strain DH4 Amel_4.0_GroupUn genomic scaffold	CH878150	4464	142	0	0
	Apis mellifera strain DH4 Amel_4.0_GroupUn genomic scaffold	CH878151	4172	2	0	0
	Apis mellifera strain DH4 Amel_4.0_GroupUn genomic scaffold	CH878152	4774	166	0	0
	Apis mellifera strain DH4 Amel_4.0_GroupUn genomic scaffold	CH878153	15024	475	0	0
	Apis mellifera strain DH4 Amel_4.0_GroupUn genomic scaffold	CH878154	7022	232	2	6
	Apis mellifera strain DH4 Amel_4.0_GroupUn genomic scaffold	CH878155	11820	126	0	0
	Apis mellifera strain DH4 Amel_4.0_GroupUn genomic scaffold	CH878156	9036	296	0	0
	Apis mellifera strain DH4 Amel_4.0_GroupUn genomic scaffold	CH878157	10848	347	0	0
	Apis mellifera strain DH4 Amel_4.0_GroupUn genomic scaffold	CH878158	9086	306	2	6
	Apis mellifera strain DH4 Amel_4.0_GroupUn genomic scaffold	CH878159	4057	107	0	0
	Apis mellifera strain DH4 Amel_4.0_GroupUn genomic scaffold	CH878160	2999	32	0	0
	Apis mellifera strain DH4 Amel_4.0_GroupUn genomic scaffold	CH878161	9990	347	0	0
	Apis mellifera strain DH4 Amel_4.0_GroupUn genomic scaffold	CH878162	16220	404	0	0
	Apis mellifera strain DH4 Amel_4.0_GroupUn genomic scaffold	CH878163	26339	766	0	0
	Apis mellifera strain DH4 Amel_4.0_GroupUn genomic scaffold	CH878164	2452	31	0	0
	Apis mellifera strain DH4 Amel_4.0_GroupUn genomic scaffold	CH878165	11570	237	2	7
	Apis mellifera strain DH4 Amel_4.0_GroupUn genomic scaffold	CH878166	6229	163	0	0
	Apis mellifera strain DH4 Amel_4.0_GroupUn genomic scaffold	CH878167	6057	210	0	0
	Apis mellifera strain DH4 Amel_4.0_GroupUn genomic scaffold	CH878168	5397	176	0	0
	Apis mellifera strain DH4 Amel_4.0_GroupUn genomic scaffold	CH878169	12691	51	0	0
	Apis mellifera strain DH4 Amel_4.0_GroupUn genomic scaffold	CH878170	16635	541	0	0
	Apis mellifera strain DH4 Amel_4.0_GroupUn genomic scaffold	CH878171	10943	347	1	2
	Apis mellifera strain DH4 Amel_4.0_GroupUn genomic scaffold	CH878172	6519	37	0	0
	Apis mellifera strain DH4 Amel_4.0_GroupUn genomic scaffold	CH878173	7811	146	0	0
	Apis mellifera strain DH4 Amel_4.0_GroupUn genomic scaffold	CH878174	14503	471	3	14
	Apis mellifera strain DH4 Amel_4.0_GroupUn genomic scaffold	CH878175	10342	45	0	0
	Apis mellifera strain DH4 Amel_4.0_GroupUn genomic scaffold	CH878176	5725	204	0	0
	Apis mellifera strain DH4 Amel_4.0_GroupUn genomic scaffold	CH878177	5173	141	0	0
	Apis mellifera strain DH4 Amel_4.0_GroupUn genomic scaffold	CH878178	17384	561	0	0
	Apis mellifera strain DH4 Amel_4.0_GroupUn genomic scaffold	CH878179	4149	36	0	0
	Apis mellifera strain DH4 Amel_4.0_GroupUn genomic scaffold	CH878180	7617	248	0	0
	Apis mellifera strain DH4 Amel_4.0_GroupUn genomic scaffold	CH878181	3957	117	0	0
	Apis mellifera strain DH4 Amel_4.0_GroupUn genomic scaffold	CH878182	2975	27	0	0
	Apis mellifera strain DH4 Amel_4.0_GroupUn genomic scaffold	CH878183	5004	59	0	0
	Apis mellifera strain DH4 Amel_4.0_GroupUn genomic scaffold	CH878184	16904	554	0	0
	Apis mellifera strain DH4 Amel_4.0_GroupUn genomic scaffold	CH878185	44635	73	0	0
	Apis mellifera strain DH4 Amel_4.0_GroupUn genomic scaffold	CH878186	6369	173	0	0
	Apis mellifera strain DH4 Amel_4.0_GroupUn genomic scaffold	CH878187	8653	276	0	0
	Apis mellifera strain DH4 Amel_4.0_GroupUn genomic scaffold	CH878188	30582	875	4	14
	Apis mellifera strain DH4 Amel_4.0_GroupUn genomic scaffold	CH878189	11658	360	0	0
	Apis mellifera strain DH4 Amel_4.0_GroupUn genomic scaffold	CH878190	4606	150	0	0
	Apis mellifera strain DH4 Amel_4.0_GroupUn genomic scaffold	CH878191	11137	362	0	0
	Apis mellifera strain DH4 Amel_4.0_GroupUn genomic scaffold	CH878192	6169	36	0	0
	Apis mellifera strain DH4 Amel_4.0_GroupUn genomic scaffold	CH878193	4090	73	0	0
	Apis mellifera strain DH4 Amel_4.0_GroupUn genomic scaffold	CH878194	36919	258	0	0
	Apis mellifera strain DH4 Amel_4.0_GroupUn genomic scaffold	CH878195	21208	739	3	31
	Apis mellifera strain DH4 Amel_4.0_GroupUn genomic scaffold	CH878196	14245	507	0	0
	Apis mellifera strain DH4 Amel_4.0_GroupUn genomic scaffold	CH878197	7791	253	2	6
	Apis mellifera strain DH4 Amel_4.0_GroupUn genomic scaffold	CH878198	10496	338	0	0
	Apis mellifera strain DH4 Amel_4.0_GroupUn genomic scaffold	CH878199	12842	419	5	33
	Apis mellifera strain DH4 Amel_4.0_GroupUn genomic scaffold	CH878200	3878	93	0	0
	Apis mellifera strain DH4 Amel_4.0_GroupUn genomic scaffold	CH878201	12412	425	0	0
	Apis mellifera strain DH4 Amel_4.0_GroupUn genomic scaffold	CH878202	4126	73	0	0
	Apis mellifera strain DH4 Amel_4.0_GroupUn genomic scaffold	CH878203	10430	73	0	0
	Apis mellifera strain DH4 Amel_4.0_GroupUn genomic scaffold	CH878204	22908	788	0	0
	Apis mellifera strain DH4 Amel_4.0_GroupUn genomic scaffold	CH878205	13932	64	0	0
	Apis mellifera strain DH4 Amel_4.0_GroupUn genomic scaffold	CH878206	13397	394	2	18
	Apis mellifera strain DH4 Amel_4.0_GroupUn genomic scaffold	CH878207	7103	252	0	0
	Apis mellifera strain DH4 Amel_4.0_GroupUn genomic scaffold	CH878208	6569	69	0	0
	Apis mellifera strain DH4 Amel_4.0_GroupUn genomic scaffold	CH878209	5426	175	2	8
	Apis mellifera strain DH4 Amel_4.0_GroupUn genomic scaffold	CH878210	10874	358	0	0
	Apis mellifera strain DH4 Amel_4.0_GroupUn genomic scaffold	CH878211	17277	603	0	0
	Apis mellifera strain DH4 Amel_4.0_GroupUn genomic scaffold	CH878212	7276	40	0	0
	Apis mellifera strain DH4 Amel_4.0_GroupUn genomic scaffold	CH878213	3723	108	0	0
	Apis mellifera strain DH4 Amel_4.0_GroupUn genomic scaffold	CH878214	18903	612	1	4
	Apis mellifera strain DH4 Amel_4.0_GroupUn genomic scaffold	CH878215	3988	119	0	0
	Apis mellifera strain DH4 Amel_4.0_GroupUn genomic scaffold	CH878216	4150	5	0	0
	Apis mellifera strain DH4 Amel_4.0_GroupUn genomic scaffold	CH878217	5380	164	0	0
	Apis mellifera strain DH4 Amel_4.0_GroupUn genomic scaffold	CH878218	4164	148	0	0
	Apis mellifera strain DH4 Amel_4.0_GroupUn genomic scaffold	CH878219	8081	285	2	12
	Apis mellifera strain DH4 Amel_4.0_GroupUn genomic scaffold	CH878220	3264	38	0	0
	Apis mellifera strain DH4 Amel_4.0_GroupUn genomic scaffold	CH878221	2685	54	0	0
	Apis mellifera strain DH4 Amel_4.0_GroupUn genomic scaffold	CH878222	7293	170	0	0
	Apis mellifera strain DH4 Amel_4.0_GroupUn genomic scaffold	CH878223	13678	463	0	0
	Apis mellifera strain DH4 Amel_4.0_GroupUn genomic scaffold	CH878224	8985	294	1	2
	Apis mellifera strain DH4 Amel_4.0_GroupUn genomic scaffold	CH878225	5741	196	0	0
	Apis mellifera strain DH4 Amel_4.0_GroupUn genomic scaffold	CH878226	33343	959	0	0
	Apis mellifera strain DH4 Amel_4.0_GroupUn genomic scaffold	CH878227	10046	344	0	0
	Apis mellifera strain DH4 Amel_4.0_GroupUn genomic scaffold	CH878228	8987	202	0	0
	Apis mellifera strain DH4 Amel_4.0_GroupUn genomic scaffold	CH878229	8313	285	2	20
	Apis mellifera strain DH4 Amel_4.0_GroupUn genomic scaffold	CH878230	11548	233	1	3
	Apis mellifera strain DH4 Amel_4.0_GroupUn genomic scaffold	CH878231	11146	65	0	0
	Apis mellifera strain DH4 Amel_4.0_GroupUn genomic scaffold	CH878232	44763	1604	1	3
	Apis mellifera strain DH4 Amel_4.0_GroupUn genomic scaffold	CH878233	18551	625	0	0
	Apis mellifera strain DH4 Amel_4.0_GroupUn genomic scaffold	CH878234	4820	154	0	0
	Apis mellifera strain DH4 Amel_4.0_GroupUn genomic scaffold	CH878235	44557	841	0	0
	Apis mellifera strain DH4 Amel_4.0_GroupUn genomic scaffold	CH878236	5069	164	0	0
	Apis mellifera strain DH4 Amel_4.0_GroupUn genomic scaffold	CH878237	12588	437	0	0
	Apis mellifera strain DH4 Amel_4.0_GroupUn genomic scaffold	CH878238	21378	742	3	13
	Apis mellifera strain DH4 Amel_4.0_GroupUn genomic scaffold	CH878239	4184	14	0	0
	Apis mellifera strain DH4 Amel_4.0_GroupUn genomic scaffold	CH878240	8530	25	0	0
	Apis mellifera strain DH4 Amel_4.0_GroupUn genomic scaffold	CH878241	6095	45	0	0
	PREDICTED: Apis mellifera similar to CG7488-PA (LOC726385), mRNA	XM_001122128	1629	2	1	1
	Paenibacillus larvae subsp. larvae BRL-230010	AARF01000001	883	15	2	2
	Paenibacillus larvae subsp. larvae BRL-230010	AARF01000002	1480	39	3	3
	Paenibacillus larvae subsp. larvae BRL-230010	AARF01000003	1461	47	3	3
	Paenibacillus larvae subsp. larvae BRL-230010	AARF01000004	1134	4	1	1
	Paenibacillus larvae subsp. larvae BRL-230010	AARF01000006	1288	6	1	1
	Paenibacillus larvae subsp. larvae BRL-230010	AARF01000007	761	2	1	1
	Paenibacillus larvae subsp. larvae BRL-230010	AARF01000009	1292	29	2	2
	Paenibacillus larvae subsp. larvae BRL-230010	AARF01000011	1589	59	2	2
	Paenibacillus larvae subsp. larvae BRL-230010	AARF01000012	683	15	1	1
	Paenibacillus larvae subsp. larvae BRL-230010	AARF01000013	714	15	1	1
	Paenibacillus larvae subsp. larvae BRL-230010	AARF01000014	1703	6	1	1
	Paenibacillus larvae subsp. larvae BRL-230010	AARF01000015	858	3	1	1
	Paenibacillus larvae subsp. larvae BRL-230010	AARF01000016	1493	53	2	2
	Paenibacillus larvae subsp. larvae BRL-230010	AARF01000017	1065	20	2	2
	Paenibacillus larvae subsp. larvae BRL-230010	AARF01000019	1565	15	0	0
	Paenibacillus larvae subsp. larvae BRL-230010	AARF01000020	1316	18	2	2
	Paenibacillus larvae subsp. larvae BRL-230010	AARF01000021	2028	4	1	1
	Paenibacillus larvae subsp. larvae BRL-230010	AARF01000022	1540	2	2	2
	Paenibacillus larvae subsp. larvae BRL-230010	AARF01000023	1492	3	2	2
	Paenibacillus larvae subsp. larvae BRL-230010	AARF01000024	675	5	1	1
	Paenibacillus larvae subsp. larvae BRL-230010	AARF01000025	788	30	2	2
	Paenibacillus larvae subsp. larvae BRL-230010	AARF01000026	1266	3	1	1
	Paenibacillus larvae subsp. larvae BRL-230010	AARF01000027	1727	53	3	3
	Paenibacillus larvae subsp. larvae BRL-230010	AARF01000028	1159	33	2	2
	Paenibacillus larvae subsp. larvae BRL-230010	AARF01000029	1624	19	2	2
	Paenibacillus larvae subsp. larvae BRL-230010	AARF01000030	1169	14	2	2
	Paenibacillus larvae subsp. larvae BRL-230010	AARF01000031	1351	5	1	1
	Paenibacillus larvae subsp. larvae BRL-230010	AARF01000032	1783	33	2	2
	Paenibacillus larvae subsp. larvae BRL-230010	AARF01000033	1569	61	2	2
	Paenibacillus larvae subsp. larvae BRL-230010	AARF01000034	930	29	1	1
	Paenibacillus larvae subsp. larvae BRL-230010	AARF01000035	2173	59	3	3
	Paenibacillus larvae subsp. larvae BRL-230010	AARF01000036	246	2	0	0
	Paenibacillus larvae subsp. larvae BRL-230010	AARF01000037	1319	6	1	1
	Paenibacillus larvae subsp. larvae BRL-230010	AARF01000038	981	14	2	2
	Paenibacillus larvae subsp. larvae BRL-230010	AARF01000039	1409	14	1	1
	Paenibacillus larvae subsp. larvae BRL-230010	AARF01000040	2924	68	7	7
	Paenibacillus larvae subsp. larvae BRL-230010	AARF01000041	956	36	1	1
	Paenibacillus larvae subsp. larvae BRL-230010	AARF01000042	1966	21	3	3
	Paenibacillus larvae subsp. larvae BRL-230010	AARF01000043	2365	7	2	2
	Paenibacillus larvae subsp. larvae BRL-230010	AARF01000044	2222	55	1	1
	Paenibacillus larvae subsp. larvae BRL-230010	AARF01000045	9792	388	8	8
	Paenibacillus larvae subsp. larvae BRL-230010	AARF01000046	2503	77	4	4
	Paenibacillus larvae subsp. larvae BRL-230010	AARF01000047	13750	521	12	12
	Paenibacillus larvae subsp. larvae BRL-230010	AARF01000048	18639	723	17	17
	Paenibacillus larvae subsp. larvae BRL-230010	AARF01000049	49416	1954	53	53
	Paenibacillus larvae subsp. larvae BRL-230010	AARF01000050	12491	494	20	20
	Paenibacillus larvae subsp. larvae BRL-230010	AARF01000051	2287	50	2	2
	Paenibacillus larvae subsp. larvae BRL-230010	AARF01000052	7801	194	8	8
	Paenibacillus larvae subsp. larvae BRL-230010	AARF01000053	44723	1709	40	40
	Paenibacillus larvae subsp. larvae BRL-230010	AARF01000054	16044	636	16	16
	Paenibacillus larvae subsp. larvae BRL-230010	AARF01000055	1867	68	4	4
	Paenibacillus larvae subsp. larvae BRL-230010	AARF01000056	8573	316	4	4
	Paenibacillus larvae subsp. larvae BRL-230010	AARF01000057	6661	239	9	9
	Paenibacillus larvae subsp. larvae BRL-230010	AARF01000058	54119	2124	59	59
	Paenibacillus larvae subsp. larvae BRL-230010	AARF01000059	10360	399	12	12
	Paenibacillus larvae subsp. larvae BRL-230010	AARF01000060	9686	378	10	10
	Paenibacillus larvae subsp. larvae BRL-230010	AARF01000061	10894	429	15	15
	Paenibacillus larvae subsp. larvae BRL-230010	AARF01000062	4614	112	5	5
	Paenibacillus larvae subsp. larvae BRL-230010	AARF01000063	8165	288	7	7
	Paenibacillus larvae subsp. larvae BRL-230010	AARF01000064	10460	365	17	17
	Paenibacillus larvae subsp. larvae BRL-230010	AARF01000065	3461	113	5	5
	Paenibacillus larvae subsp. larvae BRL-230010	AARF01000066	15932	489	17	17
	Paenibacillus larvae subsp. larvae BRL-230010	AARF01000067	18100	567	24	24
	Paenibacillus larvae subsp. larvae BRL-230010	AARF01000068	25862	923	30	30
	Paenibacillus larvae subsp. larvae BRL-230010	AARF01000069	26031	962	35	35
	Paenibacillus larvae subsp. larvae BRL-230010	AARF01000070	30924	1040	39	39
	Paenibacillus larvae subsp. larvae BRL-230010	AARF01000071	8761	343	7	7
	Paenibacillus larvae subsp. larvae BRL-230010	AARF01000072	20321	811	13	13
	Paenibacillus larvae subsp. larvae BRL-230010	AARF01000073	19032	715	24	24
	Paenibacillus larvae subsp. larvae BRL-230010	AARF01000074	28001	1061	25	25
	Paenibacillus larvae subsp. larvae BRL-230010	AARF01000075	1824	71	3	3
	Paenibacillus larvae subsp. larvae BRL-230010	AARF01000076	9007	331	14	14
	Paenibacillus larvae subsp. larvae BRL-230010	AARF01000077	18389	717	25	25
	Paenibacillus larvae subsp. larvae BRL-230010	AARF01000078	10433	382	12	12
	Paenibacillus larvae subsp. larvae BRL-230010	AARF01000079	9554	365	13	13
	Paenibacillus larvae subsp. larvae BRL-230010	AARF01000080	15674	592	14	14
	Paenibacillus larvae subsp. larvae BRL-230010	AARF01000081	1343	52	1	1
	Paenibacillus larvae subsp. larvae BRL-230010	AARF01000082	4202	69	10	10
	Paenibacillus larvae subsp. larvae BRL-230010	AARF01000083	4656	66	6	6
	Paenibacillus larvae subsp. larvae BRL-230010	AARF01000084	7134	85	7	7
	Paenibacillus larvae subsp. larvae BRL-230010	AARF01000085	6204	78	8	8
	Paenibacillus larvae subsp. larvae BRL-230010	AARF01000086	30165	1203	25	25
	Paenibacillus larvae subsp. larvae BRL-230010	AARF01000087	28613	1078	27	27
	Paenibacillus larvae subsp. larvae BRL-230010	AARF01000088	42095	1672	38	38
	Paenibacillus larvae subsp. larvae BRL-230010	AARF01000089	27497	1095	31	31
	Paenibacillus larvae subsp. larvae BRL-230010	AARF01000090	8889	324	10	10
	Paenibacillus larvae subsp. larvae BRL-230010	AARF01000091	21200	833	27	27
	Paenibacillus larvae subsp. larvae BRL-230010	AARF01000092	1609	62	2	2
	Paenibacillus larvae subsp. larvae BRL-230010	AARF01000093	14583	551	14	14
	Paenibacillus larvae subsp. larvae BRL-230010	AARF01000094	10995	437	11	11
	Paenibacillus larvae subsp. larvae BRL-230010	AARF01000095	12137	474	10	10
	Paenibacillus larvae subsp. larvae BRL-230010	AARF01000096	24263	959	28	28
	Paenibacillus larvae subsp. larvae BRL-230010	AARF01000097	3752	110	6	6
	Paenibacillus larvae subsp. larvae BRL-230010	AARF01000098	11650	414	16	16
	Paenibacillus larvae subsp. larvae BRL-230010	AARF01000099	19594	763	29	29
	Paenibacillus larvae subsp. larvae BRL-230010	AARF01000100	25997	1017	17	17
	Paenibacillus larvae subsp. larvae BRL-230010	AARF01000101	7244	285	8	8
	Paenibacillus larvae subsp. larvae BRL-230010	AARF01000102	3068	100	2	2
	Paenibacillus larvae subsp. larvae BRL-230010	AARF01000103	5674	225	7	7
	Paenibacillus larvae subsp. larvae BRL-230010	AARF01000104	8989	303	9	9
	Paenibacillus larvae subsp. larvae BRL-230010	AARF01000105	2299	52	3	3
	Paenibacillus larvae subsp. larvae BRL-230010	AARF01000106	12457	410	13	13
	Paenibacillus larvae subsp. larvae BRL-230010	AARF01000107	30690	1216	30	30
	Paenibacillus larvae subsp. larvae BRL-230010	AARF01000108	7596	215	21	21
	Paenibacillus larvae subsp. larvae BRL-230010	AARF01000109	9658	288	10	10
	Paenibacillus larvae subsp. larvae BRL-230010	AARF01000110	17313	617	37	37
	Paenibacillus larvae subsp. larvae BRL-230010	AARF01000111	33399	1306	26	26
	Paenibacillus larvae subsp. larvae BRL-230010	AARF01000112	11804	470	11	11
	Paenibacillus larvae subsp. larvae BRL-230010	AARF01000113	6394	234	7	7
	Paenibacillus larvae subsp. larvae BRL-230010	AARF01000114	10959	436	12	12
	Paenibacillus larvae subsp. larvae BRL-230010	AARF01000115	6689	264	9	9
	Paenibacillus larvae subsp. larvae BRL-230010	AARF01000116	3685	131	2	2
	Paenibacillus larvae subsp. larvae BRL-230010	AARF01000117	2338	88	3	3
	Paenibacillus larvae subsp. larvae BRL-230010	AARF01000118	4915	139	4	4
	Paenibacillus larvae subsp. larvae BRL-230010	AARF01000119	23797	862	36	36
	Paenibacillus larvae subsp. larvae BRL-230010	AARF01000120	5637	207	9	9
	Paenibacillus larvae subsp. larvae BRL-230010	AARF01000121	12608	501	14	14
	Paenibacillus larvae subsp. larvae BRL-230010	AARF01000122	12818	503	16	16
	Paenibacillus larvae subsp. larvae BRL-230010	AARF01000123	16102	616	26	26
	Paenibacillus larvae subsp. larvae BRL-230010	AARF01000124	14973	576	16	16
	Paenibacillus larvae subsp. larvae BRL-230010	AARF01000125	6539	231	11	11
	Paenibacillus larvae subsp. larvae BRL-230010	AARF01000126	3153	106	3	3
	Paenibacillus larvae subsp. larvae BRL-230010	AARF01000127	2046	80	4	4
	Paenibacillus larvae subsp. larvae BRL-230010	AARF01000128	14110	555	25	25
	Paenibacillus larvae subsp. larvae BRL-230010	AARF01000129	5931	232	8	8
	Paenibacillus larvae subsp. larvae BRL-230010	AARF01000130	13900	553	10	10
	Paenibacillus larvae subsp. larvae BRL-230010	AARF01000131	12052	479	16	16
	Paenibacillus larvae subsp. larvae BRL-230010	AARF01000132	25503	941	7	7
	Paenibacillus larvae subsp. larvae BRL-230010	AARF01000133	17761	681	16	16
	Paenibacillus larvae subsp. larvae BRL-230010	AARF01000134	58621	2225	60	60
	Paenibacillus larvae subsp. larvae BRL-230010	AARF01000135	23516	936	30	30
	Paenibacillus larvae subsp. larvae BRL-230010	AARF01000136	14125	479	17	17
	Paenibacillus larvae subsp. larvae BRL-230010	AARF01000137	20706	778	4	4
	Paenibacillus larvae subsp. larvae BRL-230010	AARF01000138	15588	611	14	14
	Paenibacillus larvae subsp. larvae BRL-230010	AARF01000139	12587	483	10	10
	Paenibacillus larvae subsp. larvae BRL-230010	AARF01000140	3399	128	4	4
	Paenibacillus larvae subsp. larvae BRL-230010	AARF01000141	10234	372	14	14
	Paenibacillus larvae subsp. larvae BRL-230010	AARF01000142	14517	453	20	20
	Paenibacillus larvae subsp. larvae BRL-230010	AARF01000143	15316	516	17	17
	Paenibacillus larvae subsp. larvae BRL-230010	AARF01000144	3192	126	4	4
	Paenibacillus larvae subsp. larvae BRL-230010	AARF01000145	2671	104	3	3
	Paenibacillus larvae subsp. larvae BRL-230010	AARF01000146	3086	87	4	4
	Paenibacillus larvae subsp. larvae BRL-230010	AARF01000147	11866	470	14	14
	Paenibacillus larvae subsp. larvae BRL-230010	AARF01000148	6470	212	16	16
	Paenibacillus larvae subsp. larvae BRL-230010	AARF01000149	17614	637	38	38
	Paenibacillus larvae subsp. larvae BRL-230010	AARF01000150	11003	423	16	16
	Paenibacillus larvae subsp. larvae BRL-230010	AARF01000151	13581	541	16	16
	Paenibacillus larvae subsp. larvae BRL-230010	AARF01000152	7349	291	11	11
	Paenibacillus larvae subsp. larvae BRL-230010	AARF01000153	13684	545	16	16
	Paenibacillus larvae subsp. larvae BRL-230010	AARF01000154	16561	660	15	15
	Paenibacillus larvae subsp. larvae BRL-230010	AARF01000155	8760	333	14	14
	Paenibacillus larvae subsp. larvae BRL-230010	AARF01000156	10711	418	17	17
	Paenibacillus larvae subsp. larvae BRL-230010	AARF01000157	11632	436	20	20
	Paenibacillus larvae subsp. larvae BRL-230010	AARF01000158	4757	181	5	5
	Paenibacillus larvae subsp. larvae BRL-230010	AARF01000159	12890	417	21	21
	Paenibacillus larvae subsp. larvae BRL-230010	AARF01000160	2512	98	3	3
	Paenibacillus larvae subsp. larvae BRL-230010	AARF01000161	10888	434	17	17
	Paenibacillus larvae subsp. larvae BRL-230010	AARF01000162	5880	179	13	13
	Paenibacillus larvae subsp. larvae BRL-230010	AARF01000163	14983	558	19	19
	Paenibacillus larvae subsp. larvae BRL-230010	AARF01000164	8702	309	7	7
	Paenibacillus larvae subsp. larvae BRL-230010	AARF01000165	3052	75	6	6
	Paenibacillus larvae subsp. larvae BRL-230010	AARF01000166	51408	1967	45	45
	Paenibacillus larvae subsp. larvae BRL-230010	AARF01000167	2990	118	4	4
	Paenibacillus larvae subsp. larvae BRL-230010	AARF01000168	24683	966	18	18
	Paenibacillus larvae subsp. larvae BRL-230010	AARF01000169	6865	187	7	7
	Paenibacillus larvae subsp. larvae BRL-230010	AARF01000170	8183	254	10	10
	Paenibacillus larvae subsp. larvae BRL-230010	AARF01000171	11797	418	12	12
	Paenibacillus larvae subsp. larvae BRL-230010	AARF01000172	7002	260	11	11
	Paenibacillus larvae subsp. larvae BRL-230010	AARF01000173	6172	245	7	7
	Paenibacillus larvae subsp. larvae BRL-230010	AARF01000174	6605	224	7	7
	Paenibacillus larvae subsp. larvae BRL-230010	AARF01000175	9689	372	13	13
	Paenibacillus larvae subsp. larvae BRL-230010	AARF01000176	30725	1225	37	37
	Paenibacillus larvae subsp. larvae BRL-230010	AARF01000177	6377	234	6	6
	Paenibacillus larvae subsp. larvae BRL-230010	AARF01000178	8257	297	9	9
	Paenibacillus larvae subsp. larvae BRL-230010	AARF01000179	4208	141	6	6
	Paenibacillus larvae subsp. larvae BRL-230010	AARF01000180	36938	1454	23	23
	Paenibacillus larvae subsp. larvae BRL-230010	AARF01000181	2300	90	3	3
	Paenibacillus larvae subsp. larvae BRL-230010	AARF01000182	17301	647	22	22
	Paenibacillus larvae subsp. larvae BRL-230010	AARF01000183	31921	1205	23	23
	Paenibacillus larvae subsp. larvae BRL-230010	AARF01000184	5298	178	7	7
	Paenibacillus larvae subsp. larvae BRL-230010	AARF01000185	11260	448	17	17
	Paenibacillus larvae subsp. larvae BRL-230010	AARF01000186	17115	650	23	23
	Paenibacillus larvae subsp. larvae BRL-230010	AARF01000187	3449	66	7	7
	Paenibacillus larvae subsp. larvae BRL-230010	AARF01000188	12452	437	17	17
	Paenibacillus larvae subsp. larvae BRL-230010	AARF01000189	15998	570	18	18
	Paenibacillus larvae subsp. larvae BRL-230010	AARF01000190	38558	1531	39	39
	Paenibacillus larvae subsp. larvae BRL-230010	AARF01000191	11048	439	10	10
	Paenibacillus larvae subsp. larvae BRL-230010	AARF01000192	5143	187	6	6
	Paenibacillus larvae subsp. larvae BRL-230010	AARF01000193	2771	86	2	2
	Paenibacillus larvae subsp. larvae BRL-230010	AARF01000194	6070	200	4	4
	Paenibacillus larvae subsp. larvae BRL-230010	AARF01000195	4436	176	4	4
	Paenibacillus larvae subsp. larvae BRL-230010	AARF01000196	8649	325	10	10
	Paenibacillus larvae subsp. larvae BRL-230010	AARF01000197	12610	502	13	13
	Paenibacillus larvae subsp. larvae BRL-230010	AARF01000198	14834	591	17	17
	Paenibacillus larvae subsp. larvae BRL-230010	AARF01000199	11774	449	8	8
	Paenibacillus larvae subsp. larvae BRL-230010	AARF01000200	2639	71	3	3
	Paenibacillus larvae subsp. larvae BRL-230010	AARF01000201	4050	100	3	3
	Paenibacillus larvae subsp. larvae BRL-230010	AARF01000202	22145	776	28	28
	Paenibacillus larvae subsp. larvae BRL-230010	AARF01000203	26929	936	35	35
	Paenibacillus larvae subsp. larvae BRL-230010	AARF01000204	3850	129	5	5
	Paenibacillus larvae subsp. larvae BRL-230010	AARF01000205	3441	113	6	6
	Paenibacillus larvae subsp. larvae BRL-230010	AARF01000206	24042	944	23	23
	Paenibacillus larvae subsp. larvae BRL-230010	AARF01000207	1668	50	1	1
	Paenibacillus larvae subsp. larvae BRL-230010	AARF01000208	5661	224	5	5
	Paenibacillus larvae subsp. larvae BRL-230010	AARF01000209	3255	128	6	6
	Paenibacillus larvae subsp. larvae BRL-230010	AARF01000210	14101	548	13	13
	Paenibacillus larvae subsp. larvae BRL-230010	AARF01000211	8354	332	12	12
	Paenibacillus larvae subsp. larvae BRL-230010	AARF01000212	10996	404	10	10
	Paenibacillus larvae subsp. larvae BRL-230010	AARF01000213	2047	80	4	4
	Paenibacillus larvae subsp. larvae BRL-230010	AARF01000214	1490	58	2	2
	Paenibacillus larvae subsp. larvae BRL-230010	AARF01000215	10880	431	15	15
	Paenibacillus larvae subsp. larvae BRL-230010	AARF01000216	6773	216	6	6
	Paenibacillus larvae subsp. larvae BRL-230010	AARF01000217	10860	424	12	12
	Paenibacillus larvae subsp. larvae BRL-230010	AARF01000218	3070	121	6	6
	Paenibacillus larvae subsp. larvae BRL-230010	AARF01000219	5050	190	8	8
	Paenibacillus larvae subsp. larvae BRL-230010	AARF01000220	7061	280	6	6
	Paenibacillus larvae subsp. larvae BRL-230010	AARF01000221	1312	50	3	3
	Paenibacillus larvae subsp. larvae BRL-230010	AARF01000222	19244	683	31	31
	Paenibacillus larvae subsp. larvae BRL-230010	AARF01000223	2029	79	4	4
	Paenibacillus larvae subsp. larvae BRL-230010	AARF01000224	11625	415	22	22
	Paenibacillus larvae subsp. larvae BRL-230010	AARF01000225	3574	130	5	5
	Paenibacillus larvae subsp. larvae BRL-230010	AARF01000226	8336	272	15	15
	Paenibacillus larvae subsp. larvae BRL-230010	AARF01000227	2108	82	4	4
	Paenibacillus larvae subsp. larvae BRL-230010	AARF01000228	6350	200	12	12
	Paenibacillus larvae subsp. larvae BRL-230010	AARF01000229	16161	563	28	28
	Paenibacillus larvae subsp. larvae BRL-230010	AARF01000230	4235	164	7	7
	Paenibacillus larvae subsp. larvae BRL-230010	AARF01000231	2801	110	3	3
	Paenibacillus larvae subsp. larvae BRL-230010	AARF01000232	18527	687	26	26
	Paenibacillus larvae subsp. larvae BRL-230010	AARF01000233	3047	113	4	4
	Paenibacillus larvae subsp. larvae BRL-230010	AARF01000234	3053	114	3	3
	Paenibacillus larvae subsp. larvae BRL-230010	AARF01000235	2190	67	2	2
	Paenibacillus larvae subsp. larvae BRL-230010	AARF01000236	4741	112	6	6
	Paenibacillus larvae subsp. larvae BRL-230010	AARF01000237	8344	321	6	6
	Paenibacillus larvae subsp. larvae BRL-230010	AARF01000238	9093	362	7	7
	Paenibacillus larvae subsp. larvae BRL-230010	AARF01000239	9852	363	6	6
	Paenibacillus larvae subsp. larvae BRL-230010	AARF01000240	8470	310	11	11
	Paenibacillus larvae subsp. larvae BRL-230010	AARF01000241	2069	81	3	3
	Paenibacillus larvae subsp. larvae BRL-230010	AARF01000242	2011	75	5	5
	Paenibacillus larvae subsp. larvae BRL-230010	AARF01000243	3901	145	6	6
	Paenibacillus larvae subsp. larvae BRL-230010	AARF01000244	11019	438	12	12
	Paenibacillus larvae subsp. larvae BRL-230010	AARF01000245	1964	77	2	2
	Paenibacillus larvae subsp. larvae BRL-230010	AARF01000246	10344	397	12	12
	Paenibacillus larvae subsp. larvae BRL-230010	AARF01000247	9380	308	11	11
	Paenibacillus larvae subsp. larvae BRL-230010	AARF01000248	3736	137	2	2
	Paenibacillus larvae subsp. larvae BRL-230010	AARF01000249	3561	100	5	5
	Paenibacillus larvae subsp. larvae BRL-230010	AARF01000250	10918	407	12	12
	Paenibacillus larvae subsp. larvae BRL-230010	AARF01000251	5785	211	6	6
	Paenibacillus larvae subsp. larvae BRL-230010	AARF01000252	2544	99	3	3
	Paenibacillus larvae subsp. larvae BRL-230010	AARF01000253	2313	91	4	4
	Paenibacillus larvae subsp. larvae BRL-230010	AARF01000254	991	2	1	1
	Paenibacillus larvae subsp. larvae BRL-230010	AARF01000255	10676	404	8	8
	Paenibacillus larvae subsp. larvae BRL-230010	AARF01000256	3259	128	4	4
	Paenibacillus larvae subsp. larvae BRL-230010	AARF01000257	2285	88	3	3
	Paenibacillus larvae subsp. larvae BRL-230010	AARF01000258	5308	197	5	5
	Paenibacillus larvae subsp. larvae BRL-230010	AARF01000259	1320	30	4	4
	Paenibacillus larvae subsp. larvae BRL-230010	AARF01000260	11147	350	14	14
	Paenibacillus larvae subsp. larvae BRL-230010	AARF01000261	14398	398	18	18
	Paenibacillus larvae subsp. larvae BRL-230010	AARF01000262	2434	91	5	5
	Paenibacillus larvae subsp. larvae BRL-230010	AARF01000263	8922	331	11	11
	Paenibacillus larvae subsp. larvae BRL-230010	AARF01000264	2632	98	2	2
	Paenibacillus larvae subsp. larvae BRL-230010	AARF01000265	10626	390	14	14
	Paenibacillus larvae subsp. larvae BRL-230010	AARF01000266	3181	125	6	6
	Paenibacillus larvae subsp. larvae BRL-230010	AARF01000267	26154	982	23	23
	Paenibacillus larvae subsp. larvae BRL-230010	AARF01000268	1317	37	3	3
	Paenibacillus larvae subsp. larvae BRL-230010	AARF01000269	9947	340	17	17
	Paenibacillus larvae subsp. larvae BRL-230010	AARF01000270	8063	321	8	8
	Paenibacillus larvae subsp. larvae BRL-230010	AARF01000271	29072	1140	35	35
	Paenibacillus larvae subsp. larvae BRL-230010	AARF01000272	2673	63	1	1
	Paenibacillus larvae subsp. larvae BRL-230010	AARF01000273	6313	218	6	6
	Paenibacillus larvae subsp. larvae BRL-230010	AARF01000274	18585	703	15	15
	Paenibacillus larvae subsp. larvae BRL-230010	AARF01000275	7973	316	13	13
	Paenibacillus larvae subsp. larvae BRL-230010	AARF01000276	5801	220	7	7
	Paenibacillus larvae subsp. larvae BRL-230010	AARF01000277	12289	439	15	15
	Paenibacillus larvae subsp. larvae BRL-230010	AARF01000278	8233	317	10	10
	Paenibacillus larvae subsp. larvae BRL-230010	AARF01000279	1431	46	2	2
	Paenibacillus larvae subsp. larvae BRL-230010	AARF01000280	11218	434	19	19
	Paenibacillus larvae subsp. larvae BRL-230010	AARF01000281	3824	143	4	4
	Paenibacillus larvae subsp. larvae BRL-230010	AARF01000282	4495	178	5	5
	Paenibacillus larvae subsp. larvae BRL-230010	AARF01000283	1623	37	2	2
	Paenibacillus larvae subsp. larvae BRL-230010	AARF01000284	9952	396	14	14
	Paenibacillus larvae subsp. larvae BRL-230010	AARF01000285	7685	292	6	6
	Paenibacillus larvae subsp. larvae BRL-230010	AARF01000286	9286	347	13	13
	Paenibacillus larvae subsp. larvae BRL-230010	AARF01000287	8958	356	13	13
	Paenibacillus larvae subsp. larvae BRL-230010	AARF01000288	5223	207	5	5
	Paenibacillus larvae subsp. larvae BRL-230010	AARF01000289	4499	178	5	5
	Paenibacillus larvae subsp. larvae BRL-230010	AARF01000290	5781	229	4	4
	Paenibacillus larvae subsp. larvae BRL-230010	AARF01000291	11767	424	14	14
	Paenibacillus larvae subsp. larvae BRL-230010	AARF01000292	3284	128	3	3
	Paenibacillus larvae subsp. larvae BRL-230010	AARF01000293	8472	337	11	11
	Paenibacillus larvae subsp. larvae BRL-230010	AARF01000294	4041	150	4	4
	Paenibacillus larvae subsp. larvae BRL-230010	AARF01000295	1610	37	2	2
	Paenibacillus larvae subsp. larvae BRL-230010	AARF01000296	2469	74	1	1
	Paenibacillus larvae subsp. larvae BRL-230010	AARF01000297	3584	135	2	2
	Paenibacillus larvae subsp. larvae BRL-230010	AARF01000298	10086	401	7	7
	Paenibacillus larvae subsp. larvae BRL-230010	AARF01000299	2474	93	2	2
	Paenibacillus larvae subsp. larvae BRL-230010	AARF01000300	3647	144	4	4
	Paenibacillus larvae subsp. larvae BRL-230010	AARF01000301	2889	112	4	4
	Paenibacillus larvae subsp. larvae BRL-230010	AARF01000302	9051	348	11	11
	Paenibacillus larvae subsp. larvae BRL-230010	AARF01000303	3359	91	3	3
	Paenibacillus larvae subsp. larvae BRL-230010	AARF01000304	5646	212	5	5
	Paenibacillus larvae subsp. larvae BRL-230010	AARF01000305	3936	141	3	3
	Paenibacillus larvae subsp. larvae BRL-230010	AARF01000306	6780	250	7	7
	Paenibacillus larvae subsp. larvae BRL-230010	AARF01000307	5151	182	6	6
	Paenibacillus larvae subsp. larvae BRL-230010	AARF01000308	5292	203	8	8
	Paenibacillus larvae subsp. larvae BRL-230010	AARF01000309	6995	273	8	8
	Paenibacillus larvae subsp. larvae BRL-230010	AARF01000310	1338	50	2	2
	Paenibacillus larvae subsp. larvae BRL-230010	AARF01000311	2798	84	5	5
	Paenibacillus larvae subsp. larvae BRL-230010	AARF01000312	3081	117	3	3
	Paenibacillus larvae subsp. larvae BRL-230010	AARF01000313	3513	139	2	2
	Paenibacillus larvae subsp. larvae BRL-230010	AARF01000314	3374	96	3	3
	Paenibacillus larvae subsp. larvae BRL-230010	AARF01000315	1597	45	3	3
	Paenibacillus larvae subsp. larvae BRL-230010	AARF01000316	8104	322	12	12
	Paenibacillus larvae subsp. larvae BRL-230010	AARF01000317	2172	85	2	2
	Paenibacillus larvae subsp. larvae BRL-230010	AARF01000318	3004	114	7	7
	Paenibacillus larvae subsp. larvae BRL-230010	AARF01000319	3809	150	6	6
	Paenibacillus larvae subsp. larvae BRL-230010	AARF01000320	3247	113	5	5
	Paenibacillus larvae subsp. larvae BRL-230010	AARF01000321	2240	88	4	4
	Paenibacillus larvae subsp. larvae BRL-230010	AARF01000322	11234	444	12	12
	Paenibacillus larvae subsp. larvae BRL-230010	AARF01000323	3560	117	2	2
	Paenibacillus larvae subsp. larvae BRL-230010	AARF01000324	6626	262	11	11
	Paenibacillus larvae subsp. larvae BRL-230010	AARF01000325	15283	585	22	22
	Paenibacillus larvae subsp. larvae BRL-230010	AARF01000326	7452	295	12	12
	Paenibacillus larvae subsp. larvae BRL-230010	AARF01000327	3224	105	1	1
	Paenibacillus larvae subsp. larvae BRL-230010	AARF01000328	15549	620	14	14
	Paenibacillus larvae subsp. larvae BRL-230010	AARF01000329	4338	172	5	5
	Paenibacillus larvae subsp. larvae BRL-230010	AARF01000330	3006	95	3	3
	Paenibacillus larvae subsp. larvae BRL-230010	AARF01000331	3373	122	4	4
	Paenibacillus larvae subsp. larvae BRL-230010	AARF01000332	3101	103	2	2
	Paenibacillus larvae subsp. larvae BRL-230010	AARF01000333	1798	63	2	2
	Paenibacillus larvae subsp. larvae BRL-230010	AARF01000334	1772	69	1	1
	Paenibacillus larvae subsp. larvae BRL-230010	AARF01000335	7586	276	7	7
	Paenibacillus larvae subsp. larvae BRL-230010	AARF01000336	3800	143	4	4
	Paenibacillus larvae subsp. larvae BRL-230010	AARF01000337	2672	82	3	3
	Paenibacillus larvae subsp. larvae BRL-230010	AARF01000338	2519	98	3	3
	Paenibacillus larvae subsp. larvae BRL-230010	AARF01000339	6457	244	5	5
	Paenibacillus larvae subsp. larvae BRL-230010	AARF01000340	3499	122	3	3
	Paenibacillus larvae subsp. larvae BRL-230010	AARF01000341	1192	46	2	2
	Paenibacillus larvae subsp. larvae BRL-230010	AARF01000342	4858	166	7	7
	Paenibacillus larvae subsp. larvae BRL-230010	AARF01000343	2953	103	2	2
	Paenibacillus larvae subsp. larvae BRL-230010	AARF01000344	4581	162	4	4
	Paenibacillus larvae subsp. larvae BRL-230010	AARF01000345	3039	107	5	5
	Paenibacillus larvae subsp. larvae BRL-230010	AARF01000346	2489	98	3	3
	Paenibacillus larvae subsp. larvae BRL-230010	AARF01000347	1438	56	2	2
	Paenibacillus larvae subsp. larvae BRL-230010	AARF01000348	2150	84	3	3
	Paenibacillus larvae subsp. larvae BRL-230010	AARF01000349	2696	69	7	7
	Paenibacillus larvae subsp. larvae BRL-230010	AARF01000350	7154	165	9	9
	Paenibacillus larvae subsp. larvae BRL-230010	AARF01000351	7171	150	9	9
	Paenibacillus larvae subsp. larvae BRL-230010	AARF01000352	1754	62	4	4
	Paenibacillus larvae subsp. larvae BRL-230010	AARF01000353	1007	26	1	1
	Paenibacillus larvae subsp. larvae BRL-230010	AARF01000354	3085	121	4	4
	Paenibacillus larvae subsp. larvae BRL-230010	AARF01000355	2605	102	7	7
	Paenibacillus larvae subsp. larvae BRL-230010	AARF01000356	2221	87	2	2
	Paenibacillus larvae subsp. larvae BRL-230010	AARF01000357	4008	145	4	4
	Paenibacillus larvae subsp. larvae BRL-230010	AARF01000358	3818	141	8	8
	Paenibacillus larvae subsp. larvae BRL-230010	AARF01000359	10118	375	19	19
	Paenibacillus larvae subsp. larvae BRL-230010	AARF01000360	12143	476	12	12
	Paenibacillus larvae subsp. larvae BRL-230010	AARF01000361	9429	355	9	9
	Paenibacillus larvae subsp. larvae BRL-230010	AARF01000362	4936	195	5	5
	Paenibacillus larvae subsp. larvae BRL-230010	AARF01000363	2276	75	2	2
	Paenibacillus larvae subsp. larvae BRL-230010	AARF01000364	6742	245	9	9
	Paenibacillus larvae subsp. larvae BRL-230010	AARF01000365	8058	320	13	13
	Paenibacillus larvae subsp. larvae BRL-230010	AARF01000366	4330	171	6	6
	Paenibacillus larvae subsp. larvae BRL-230010	AARF01000367	11301	450	16	16
	Paenibacillus larvae subsp. larvae BRL-230010	AARF01000368	2949	116	2	2
	Paenibacillus larvae subsp. larvae BRL-230010	AARF01000369	5608	203	6	6
	Paenibacillus larvae subsp. larvae BRL-230010	AARF01000370	1382	53	3	3
	Paenibacillus larvae subsp. larvae BRL-230010	AARF01000371	4063	146	5	5
	Paenibacillus larvae subsp. larvae BRL-230010	AARF01000372	1679	65	2	2
	Paenibacillus larvae subsp. larvae BRL-230010	AARF01000373	1855	72	3	3
	Paenibacillus larvae subsp. larvae BRL-230010	AARF01000374	1849	68	2	2
	Paenibacillus larvae subsp. larvae BRL-230010	AARF01000375	1829	71	1	1
	Paenibacillus larvae subsp. larvae BRL-230010	AARF01000376	2616	93	3	3
	Paenibacillus larvae subsp. larvae BRL-230010	AARF01000377	7412	282	7	7
	Paenibacillus larvae subsp. larvae BRL-230010	AARF01000378	1402	25	0	0
	Paenibacillus larvae subsp. larvae BRL-230010	AARF01000379	5480	215	5	5
	Paenibacillus larvae subsp. larvae BRL-230010	AARF01000380	14791	588	20	20
	Paenibacillus larvae subsp. larvae BRL-230010	AARF01000381	2460	92	3	3
	Paenibacillus larvae subsp. larvae BRL-230010	AARF01000382	3268	120	5	5
	Paenibacillus larvae subsp. larvae BRL-230010	AARF01000383	7484	296	10	10
	Paenibacillus larvae subsp. larvae BRL-230010	AARF01000384	1391	52	3	3
	Paenibacillus larvae subsp. larvae BRL-230010	AARF01000385	12652	486	15	15
	Paenibacillus larvae subsp. larvae BRL-230010	AARF01000386	13506	538	12	12
	Paenibacillus larvae subsp. larvae BRL-230010	AARF01000387	2074	67	2	2
	Paenibacillus larvae subsp. larvae BRL-230010	AARF01000388	7448	285	7	7
	Paenibacillus larvae subsp. larvae BRL-230010	AARF01000389	4866	193	4	4
	Paenibacillus larvae subsp. larvae BRL-230010	AARF01000390	3463	125	6	6
	Paenibacillus larvae subsp. larvae BRL-230010	AARF01000391	2471	97	2	2
	Paenibacillus larvae subsp. larvae BRL-230010	AARF01000392	2233	87	2	2
	Paenibacillus larvae subsp. larvae BRL-230010	AARF01000393	9901	373	10	10
	Paenibacillus larvae subsp. larvae BRL-230010	AARF01000394	8323	329	9	9
	Paenibacillus larvae subsp. larvae BRL-230010	AARF01000395	4197	163	4	4
	Paenibacillus larvae subsp. larvae BRL-230010	AARF01000396	2973	116	3	3
	Paenibacillus larvae subsp. larvae BRL-230010	AARF01000397	4726	144	8	8
	Paenibacillus larvae subsp. larvae BRL-230010	AARF01000398	4396	173	4	4
	Paenibacillus larvae subsp. larvae BRL-230010	AARF01000399	3086	109	5	5
	Paenibacillus larvae subsp. larvae BRL-230010	AARF01000400	1666	28	3	3
	Paenibacillus larvae subsp. larvae BRL-230010	AARF01000401	2828	111	4	4
	Paenibacillus larvae subsp. larvae BRL-230010	AARF01000402	4534	179	9	9
	Paenibacillus larvae subsp. larvae BRL-230010	AARF01000403	3670	145	5	5
	Paenibacillus larvae subsp. larvae BRL-230010	AARF01000404	4797	172	7	7
	Paenibacillus larvae subsp. larvae BRL-230010	AARF01000405	4853	192	4	4
	Paenibacillus larvae subsp. larvae BRL-230010	AARF01000406	1214	46	2	2
	Paenibacillus larvae subsp. larvae BRL-230010	AARF01000407	7202	273	6	6
	Paenibacillus larvae subsp. larvae BRL-230010	AARF01000408	1435	55	2	2
	Paenibacillus larvae subsp. larvae BRL-230010	AARF01000409	2225	87	2	2
	Paenibacillus larvae subsp. larvae BRL-230010	AARF01000410	2938	115	2	2
	Paenibacillus larvae subsp. larvae BRL-230010	AARF01000411	6109	242	4	4
	Paenibacillus larvae subsp. larvae BRL-230010	AARF01000412	3400	134	5	5
	Paenibacillus larvae subsp. larvae BRL-230010	AARF01000413	2400	94	4	4
	Paenibacillus larvae subsp. larvae BRL-230010	AARF01000414	8430	273	12	12
	Paenibacillus larvae subsp. larvae BRL-230010	AARF01000415	2642	86	1	1
	Paenibacillus larvae subsp. larvae BRL-230010	AARF01000416	7462	286	7	7
	Paenibacillus larvae subsp. larvae BRL-230010	AARF01000417	4477	156	5	5
	Paenibacillus larvae subsp. larvae BRL-230010	AARF01000418	1324	18	1	1
	Paenibacillus larvae subsp. larvae BRL-230010	AARF01000419	3828	129	3	3
	Paenibacillus larvae subsp. larvae BRL-230010	AARF01000420	4696	117	12	12
	Paenibacillus larvae subsp. larvae BRL-230010	AARF01000421	1344	37	2	2
	Paenibacillus larvae subsp. larvae BRL-230010	AARF01000422	1625	58	2	2
	Paenibacillus larvae subsp. larvae BRL-230010	AARF01000423	1076	23	1	1
	Paenibacillus larvae subsp. larvae BRL-230010	AARF01000424	8124	323	11	11
	Paenibacillus larvae subsp. larvae BRL-230010	AARF01000425	3612	141	4	4
	Paenibacillus larvae subsp. larvae BRL-230010	AARF01000426	2561	81	3	3
	Paenibacillus larvae subsp. larvae BRL-230010	AARF01000427	8760	348	8	8
	Paenibacillus larvae subsp. larvae BRL-230010	AARF01000428	3620	134	2	2
	Paenibacillus larvae subsp. larvae BRL-230010	AARF01000429	3568	133	5	5
	Paenibacillus larvae subsp. larvae BRL-230010	AARF01000430	2776	109	2	2
	Paenibacillus larvae subsp. larvae BRL-230010	AARF01000431	6342	244	5	5
	Paenibacillus larvae subsp. larvae BRL-230010	AARF01000432	2191	73	1	1
	Paenibacillus larvae subsp. larvae BRL-230010	AARF01000433	5230	187	5	5
	Paenibacillus larvae subsp. larvae BRL-230010	AARF01000434	2724	94	4	4
	Paenibacillus larvae subsp. larvae BRL-230010	AARF01000435	1591	27	1	1
	Paenibacillus larvae subsp. larvae BRL-230010	AARF01000436	6201	246	9	9
	Paenibacillus larvae subsp. larvae BRL-230010	AARF01000437	5043	199	3	3
	Paenibacillus larvae subsp. larvae BRL-230010	AARF01000438	11668	465	15	15
	Paenibacillus larvae subsp. larvae BRL-230010	AARF01000439	1694	46	2	2
	Paenibacillus larvae subsp. larvae BRL-230010	AARF01000440	3192	104	2	2
	Paenibacillus larvae subsp. larvae BRL-230010	AARF01000441	5962	214	7	7
	Paenibacillus larvae subsp. larvae BRL-230010	AARF01000442	1928	74	6	6
	Paenibacillus larvae subsp. larvae BRL-230010	AARF01000443	4073	143	6	6
	Paenibacillus larvae subsp. larvae BRL-230010	AARF01000444	2821	111	3	3
	Paenibacillus larvae subsp. larvae BRL-230010	AARF01000445	2427	95	3	3
	Paenibacillus larvae subsp. larvae BRL-230010	AARF01000446	3159	124	3	3
	Paenibacillus larvae subsp. larvae BRL-230010	AARF01000447	2883	90	3	3
	Paenibacillus larvae subsp. larvae BRL-230010	AARF01000448	1538	60	3	3
	Paenibacillus larvae subsp. larvae BRL-230010	AARF01000449	4122	148	5	5
	Paenibacillus larvae subsp. larvae BRL-230010	AARF01000450	4760	184	4	4
	Paenibacillus larvae subsp. larvae BRL-230010	AARF01000451	3276	129	2	2
	Paenibacillus larvae subsp. larvae BRL-230010	AARF01000452	1967	74	2	2
	Paenibacillus larvae subsp. larvae BRL-230010	AARF01000453	2325	79	4	4
	Paenibacillus larvae subsp. larvae BRL-230010	AARF01000454	4401	129	5	5
	Paenibacillus larvae subsp. larvae BRL-230010	AARF01000455	1837	56	2	2
	Paenibacillus larvae subsp. larvae BRL-230010	AARF01000456	2064	62	3	3
	Paenibacillus larvae subsp. larvae BRL-230010	AARF01000457	3120	82	7	7
	Paenibacillus larvae subsp. larvae BRL-230010	AARF01000458	4431	136	13	13
	Paenibacillus larvae subsp. larvae BRL-230010	AARF01000459	4249	154	8	8
	Paenibacillus larvae subsp. larvae BRL-230010	AARF01000460	6420	234	9	9
	Paenibacillus larvae subsp. larvae BRL-230010	AARF01000461	1871	73	3	3
	Paenibacillus larvae subsp. larvae BRL-230010	AARF01000462	2096	82	3	3
	Paenibacillus larvae subsp. larvae BRL-230010	AARF01000463	2477	94	4	4
	Paenibacillus larvae subsp. larvae BRL-230010	AARF01000464	2191	80	4	4
	Paenibacillus larvae subsp. larvae BRL-230010	AARF01000465	4765	163	4	4
	Paenibacillus larvae subsp. larvae BRL-230010	AARF01000466	3855	134	6	6
	Paenibacillus larvae subsp. larvae BRL-230010	AARF01000467	1900	74	3	3
	Paenibacillus larvae subsp. larvae BRL-230010	AARF01000468	2014	50	1	1
	Paenibacillus larvae subsp. larvae BRL-230010	AARF01000469	1481	52	0	0
	Paenibacillus larvae subsp. larvae BRL-230010	AARF01000470	2265	73	4	4
	Paenibacillus larvae subsp. larvae BRL-230010	AARF01000471	2193	85	4	4
	Paenibacillus larvae subsp. larvae BRL-230010	AARF01000472	1787	70	1	1
	Paenibacillus larvae subsp. larvae BRL-230010	AARF01000473	2100	81	2	2
	Paenibacillus larvae subsp. larvae BRL-230010	AARF01000474	3078	104	2	2
	Paenibacillus larvae subsp. larvae BRL-230010	AARF01000475	2920	115	3	3
	Paenibacillus larvae subsp. larvae BRL-230010	AARF01000476	4707	185	6	6
	Paenibacillus larvae subsp. larvae BRL-230010	AARF01000477	8391	305	7	7
	Paenibacillus larvae subsp. larvae BRL-230010	AARF01000478	1178	43	2	2
	Paenibacillus larvae subsp. larvae BRL-230010	AARF01000479	4600	181	7	7
	Paenibacillus larvae subsp. larvae BRL-230010	AARF01000480	1207	40	2	2
	Paenibacillus larvae subsp. larvae BRL-230010	AARF01000481	2963	116	3	3
	Paenibacillus larvae subsp. larvae BRL-230010	AARF01000482	1438	56	2	2
	Paenibacillus larvae subsp. larvae BRL-230010	AARF01000483	5568	220	6	6
	Paenibacillus larvae subsp. larvae BRL-230010	AARF01000484	3464	137	5	5
	Paenibacillus larvae subsp. larvae BRL-230010	AARF01000485	2288	84	5	5
	Paenibacillus larvae subsp. larvae BRL-230010	AARF01000486	3122	88	2	2
	Paenibacillus larvae subsp. larvae BRL-230010	AARF01000487	2811	91	5	5
	Paenibacillus larvae subsp. larvae BRL-230010	AARF01000488	4175	152	4	4
	Paenibacillus larvae subsp. larvae BRL-230010	AARF01000489	1463	34	1	1
	Paenibacillus larvae subsp. larvae BRL-230010	AARF01000490	4558	142	12	12
	Paenibacillus larvae subsp. larvae BRL-230010	AARF01000491	6139	244	5	5
	Paenibacillus larvae subsp. larvae BRL-230010	AARF01000492	3330	130	3	3
	Paenibacillus larvae subsp. larvae BRL-230010	AARF01000493	3802	141	4	4
	Paenibacillus larvae subsp. larvae BRL-230010	AARF01000494	1551	58	2	2
	Paenibacillus larvae subsp. larvae BRL-230010	AARF01000495	3241	128	4	4
	Paenibacillus larvae subsp. larvae BRL-230010	AARF01000496	2403	82	4	4
	Paenibacillus larvae subsp. larvae BRL-230010	AARF01000497	3530	139	4	4
	Paenibacillus larvae subsp. larvae BRL-230010	AARF01000498	2021	67	3	3
	Paenibacillus larvae subsp. larvae BRL-230010	AARF01000499	1645	50	1	1
	Paenibacillus larvae subsp. larvae BRL-230010	AARF01000500	2686	58	1	1
	Paenibacillus larvae subsp. larvae BRL-230010	AARF01000501	3579	104	4	4
	Paenibacillus larvae subsp. larvae BRL-230010	AARF01000502	1145	44	1	1
	Paenibacillus larvae subsp. larvae BRL-230010	AARF01000503	2621	103	4	4
	Paenibacillus larvae subsp. larvae BRL-230010	AARF01000504	2114	83	2	2
	Paenibacillus larvae subsp. larvae BRL-230010	AARF01000505	2361	93	4	4
	Paenibacillus larvae subsp. larvae BRL-230010	AARF01000506	1203	40	3	3
	Paenibacillus larvae subsp. larvae BRL-230010	AARF01000507	1186	37	5	5
	Paenibacillus larvae subsp. larvae BRL-230010	AARF01000508	2118	83	2	2
	Paenibacillus larvae subsp. larvae BRL-230010	AARF01000509	2140	51	1	1
	Paenibacillus larvae subsp. larvae BRL-230010	AARF01000510	2864	112	3	3
	Paenibacillus larvae subsp. larvae BRL-230010	AARF01000511	1909	73	5	5
	Paenibacillus larvae subsp. larvae BRL-230010	AARF01000512	2428	95	3	3
	Paenibacillus larvae subsp. larvae BRL-230010	AARF01000513	981	37	1	1
	Paenibacillus larvae subsp. larvae BRL-230010	AARF01000514	2251	54	2	2
	Paenibacillus larvae subsp. larvae BRL-230010	AARF01000515	2512	48	7	7
	Paenibacillus larvae subsp. larvae BRL-230010	AARF01000516	2531	81	3	3
	Paenibacillus larvae subsp. larvae BRL-230010	AARF01000517	1414	55	1	1
	Paenibacillus larvae subsp. larvae BRL-230010	AARF01000518	2582	83	2	2
	Paenibacillus larvae subsp. larvae BRL-230010	AARF01000519	2712	95	3	3
	Paenibacillus larvae subsp. larvae BRL-230010	AARF01000520	1750	57	2	2
	Paenibacillus larvae subsp. larvae BRL-230010	AARF01000521	1501	32	2	2
	Paenibacillus larvae subsp. larvae BRL-230010	AARF01000522	5016	193	5	5
	Paenibacillus larvae subsp. larvae BRL-230010	AARF01000523	1184	45	3	3
	Paenibacillus larvae subsp. larvae BRL-230010	AARF01000524	3507	138	4	4
	Paenibacillus larvae subsp. larvae BRL-230010	AARF01000525	1370	34	1	1
	Paenibacillus larvae subsp. larvae BRL-230010	AARF01000526	3101	99	8	8
	Paenibacillus larvae subsp. larvae BRL-230010	AARF01000527	2103	64	2	2
	Paenibacillus larvae subsp. larvae BRL-230010	AARF01000528	2283	89	3	3
	Paenibacillus larvae subsp. larvae BRL-230010	AARF01000529	1932	72	3	3
	Paenibacillus larvae subsp. larvae BRL-230010	AARF01000530	1952	76	2	2
	Paenibacillus larvae subsp. larvae BRL-230010	AARF01000531	4182	165	5	5
	Paenibacillus larvae subsp. larvae BRL-230010	AARF01000532	2509	98	2	2
	Paenibacillus larvae subsp. larvae BRL-230010	AARF01000533	2414	74	3	3
	Paenibacillus larvae subsp. larvae BRL-230010	AARF01000534	6687	245	15	15
	Paenibacillus larvae subsp. larvae BRL-230010	AARF01000535	3109	122	5	5
	Paenibacillus larvae subsp. larvae BRL-230010	AARF01000536	1893	74	5	5
	Paenibacillus larvae subsp. larvae BRL-230010	AARF01000537	1750	49	2	2
	Paenibacillus larvae subsp. larvae BRL-230010	AARF01000538	3018	118	5	5
	Paenibacillus larvae subsp. larvae BRL-230010	AARF01000539	1881	53	2	2
	Paenibacillus larvae subsp. larvae BRL-230010	AARF01000540	3862	138	3	3
	Paenibacillus larvae subsp. larvae BRL-230010	AARF01000541	3010	105	6	6
	Paenibacillus larvae subsp. larvae BRL-230010	AARF01000542	3858	152	6	6
	Paenibacillus larvae subsp. larvae BRL-230010	AARF01000543	2058	80	4	4
	Paenibacillus larvae subsp. larvae BRL-230010	AARF01000544	2133	78	3	3
	Paenibacillus larvae subsp. larvae BRL-230010	AARF01000545	2388	93	3	3
	Paenibacillus larvae subsp. larvae BRL-230010	AARF01000546	3261	128	2	2
	Paenibacillus larvae subsp. larvae BRL-230010	AARF01000547	2572	100	3	3
	Paenibacillus larvae subsp. larvae BRL-230010	AARF01000548	1987	42	4	4
	Paenibacillus larvae subsp. larvae BRL-230010	AARF01000549	2237	76	3	3
	Paenibacillus larvae subsp. larvae BRL-230010	AARF01000550	1862	72	2	2
	Paenibacillus larvae subsp. larvae BRL-230010	AARF01000551	3861	144	7	7
	Paenibacillus larvae subsp. larvae BRL-230010	AARF01000552	1528	47	2	2
	Paenibacillus larvae subsp. larvae BRL-230010	AARF01000553	1922	75	5	5
	Paenibacillus larvae subsp. larvae BRL-230010	AARF01000554	1768	44	2	2
	Paenibacillus larvae subsp. larvae BRL-230010	AARF01000555	1485	57	1	1
	Paenibacillus larvae subsp. larvae BRL-230010	AARF01000556	2903	114	4	4
	Paenibacillus larvae subsp. larvae BRL-230010	AARF01000557	3237	128	5	5
	Paenibacillus larvae subsp. larvae BRL-230010	AARF01000558	1673	43	2	2
	Paenibacillus larvae subsp. larvae BRL-230010	AARF01000559	1306	50	1	1
	Paenibacillus larvae subsp. larvae BRL-230010	AARF01000560	2464	97	3	3
	Paenibacillus larvae subsp. larvae BRL-230010	AARF01000561	2240	61	1	1
	Paenibacillus larvae subsp. larvae BRL-230010	AARF01000562	8725	305	8	8
	Paenibacillus larvae subsp. larvae BRL-230010	AARF01000563	2006	73	2	2
	Paenibacillus larvae subsp. larvae BRL-230010	AARF01000564	1460	20	1	1
	Paenibacillus larvae subsp. larvae BRL-230010	AARF01000565	2595	96	3	3
	Paenibacillus larvae subsp. larvae BRL-230010	AARF01000566	1081	41	2	2
	Paenibacillus larvae subsp. larvae BRL-230010	AARF01000567	1974	73	2	2
	Paenibacillus larvae subsp. larvae BRL-230010	AARF01000568	1338	36	1	1
	Paenibacillus larvae subsp. larvae BRL-230010	AARF01000569	2896	112	3	3
	Paenibacillus larvae subsp. larvae BRL-230010	AARF01000570	2120	83	2	2
	Paenibacillus larvae subsp. larvae BRL-230010	AARF01000571	2866	108	4	4
	Paenibacillus larvae subsp. larvae BRL-230010	AARF01000572	2135	81	3	3
	Paenibacillus larvae subsp. larvae BRL-230010	AARF01000573	1146	44	1	1
	Paenibacillus larvae subsp. larvae BRL-230010	AARF01000574	1874	69	4	4
	Paenibacillus larvae subsp. larvae BRL-230010	AARF01000575	3228	127	6	6
	Paenibacillus larvae subsp. larvae BRL-230010	AARF01000576	5134	203	8	8
	Paenibacillus larvae subsp. larvae BRL-230010	AARF01000577	1345	28	1	1
	Paenibacillus larvae subsp. larvae BRL-230010	AARF01000578	1498	58	4	4
	Paenibacillus larvae subsp. larvae BRL-230010	AARF01000579	1179	45	2	2
	Paenibacillus larvae subsp. larvae BRL-230010	AARF01000580	1742	55	1	1
	Paenibacillus larvae subsp. larvae BRL-230010	AARF01000581	3907	142	5	5
	Paenibacillus larvae subsp. larvae BRL-230010	AARF01000582	2014	60	2	2
	Paenibacillus larvae subsp. larvae BRL-230010	AARF01000583	1723	51	1	1
	Paenibacillus larvae subsp. larvae BRL-230010	AARF01000584	1478	57	2	2
	Paenibacillus larvae subsp. larvae BRL-230010	AARF01000585	1219	46	1	1
	Paenibacillus larvae subsp. larvae BRL-230010	AARF01000586	1176	45	0	0
	Paenibacillus larvae subsp. larvae BRL-230010	AARF01000587	2142	84	2	2
	Paenibacillus larvae subsp. larvae BRL-230010	AARF01000588	2284	89	3	3
	Paenibacillus larvae subsp. larvae BRL-230010	AARF01000589	2576	101	3	3
	Paenibacillus larvae subsp. larvae BRL-230010	AARF01000590	3530	131	8	8
	Paenibacillus larvae subsp. larvae BRL-230010	AARF01000591	2180	84	2	2
	Paenibacillus larvae subsp. larvae BRL-230010	AARF01000592	1685	65	2	2
	Paenibacillus larvae subsp. larvae BRL-230010	AARF01000593	1796	70	3	3
	Paenibacillus larvae subsp. larvae BRL-230010	AARF01000594	3142	124	4	4
	Paenibacillus larvae subsp. larvae BRL-230010	AARF01000595	1696	66	2	2
	Paenibacillus larvae subsp. larvae BRL-230010	AARF01000596	1532	58	4	4
	Paenibacillus larvae subsp. larvae BRL-230010	AARF01000597	1833	71	3	3
	Paenibacillus larvae subsp. larvae BRL-230010	AARF01000598	1976	77	3	3
	Paenibacillus larvae subsp. larvae BRL-230010	AARF01000599	1989	77	5	5
	Paenibacillus larvae subsp. larvae BRL-230010	AARF01000600	1902	74	3	3
	Paenibacillus larvae subsp. larvae BRL-230010	AARF01000601	1664	65	3	3
	Paenibacillus larvae subsp. larvae BRL-230010	AARF01000602	1586	61	4	4
	Paenibacillus larvae subsp. larvae BRL-230010	AARF01000603	1929	75	3	3
	Paenibacillus larvae subsp. larvae BRL-230010	AARF01000604	1178	45	2	2
	Paenibacillus larvae subsp. larvae BRL-230010	AARF01000605	2019	64	2	2
	Paenibacillus larvae subsp. larvae BRL-230010	AARF01000606	1868	73	2	2
	Paenibacillus larvae subsp. larvae BRL-230010	AARF01000607	1741	32	3	3
	Paenibacillus larvae subsp. larvae BRL-230010	AARF01000608	2082	81	1	1
	Paenibacillus larvae subsp. larvae BRL-230010	AARF01000609	1421	55	3	3
	Paenibacillus larvae subsp. larvae BRL-230010	AARF01000610	1896	73	1	1
	Paenibacillus larvae subsp. larvae BRL-230010	AARF01000611	1609	62	4	4
	Paenibacillus larvae subsp. larvae BRL-230010	AARF01000612	1352	52	2	2
	Paenibacillus larvae subsp. larvae BRL-230010	AARF01000613	1224	40	3	3
	Paenibacillus larvae subsp. larvae BRL-230010	AARF01000614	1766	69	2	2
	Paenibacillus larvae subsp. larvae BRL-230010	AARF01000615	1338	52	2	2
	Paenibacillus larvae subsp. larvae BRL-230010	AARF01000616	1470	57	2	2
	Paenibacillus larvae subsp. larvae BRL-230010	AARF01000617	1600	62	2	2
	Paenibacillus larvae subsp. larvae BRL-230010	AARF01000618	1568	61	3	3
	Paenibacillus larvae subsp. larvae BRL-230010	AARF01000619	2265	88	4	4
	Paenibacillus larvae subsp. larvae BRL-230010	AARF01000620	1860	71	1	1
	Paenibacillus larvae subsp. larvae BRL-230010	AARF01000621	2384	80	3	3
	Paenibacillus larvae subsp. larvae BRL-230010	AARF01000622	2403	92	3	3
	Paenibacillus larvae subsp. larvae BRL-230010	AARF01000623	1569	48	2	2
	Paenibacillus larvae subsp. larvae BRL-230010	AARF01000624	1712	66	3	3
	Paenibacillus larvae subsp. larvae BRL-230010	AARF01000625	2015	74	3	3
	Paenibacillus larvae subsp. larvae BRL-230010	AARF01000626	2110	65	3	3
	Paenibacillus larvae subsp. larvae BRL-230010	AARF01000627	1473	57	1	1
	Paenibacillus larvae subsp. larvae BRL-230010	AARF01000628	982	37	3	3
	Paenibacillus larvae subsp. larvae BRL-230010	AARF01000629	1334	51	1	1
	Paenibacillus larvae subsp. larvae BRL-230010	AARF01000630	1380	42	2	2
	Paenibacillus larvae subsp. larvae BRL-230010	AARF01000631	1745	67	4	4
	Paenibacillus larvae subsp. larvae BRL-230010	AARF01000632	1520	36	1	1
	Paenibacillus larvae subsp. larvae BRL-230010	AARF01000633	1190	44	3	3
	Paenibacillus larvae subsp. larvae BRL-230010	AARF01000634	1345	52	1	1
	Paenibacillus larvae subsp. larvae BRL-230010	AARF01000635	1824	64	4	4
	Paenibacillus larvae subsp. larvae BRL-230010	AARF01000636	1567	22	1	1
	Paenibacillus larvae subsp. larvae BRL-230010	AARF01000637	1655	64	2	2
[truncated: 5,798 more rows]
